# Supplementary material for: Understanding the Bacterial Response to Mycotoxins: The Transcriptomic Analysis of Deoxynivalenol-Induced Changes in Devosia mutans 17-2-E-8
Source: Front Pharmacol. 2019 Nov 14;10:1098. doi: 10.3389/fphar.2019.01098 (PMC6868067; doi:10.3389/fphar.2019.01098)
Supplement: Supplementary Table 1 — A comprehensive list of Devosia mutans 17-2-E-8 transcripts that have been modulated (up or down-regulated) in response to deoxynivalenol (50 µg/ml) inclusion in bacterial growth media. [file Table_1.xlsx]

## Sheet: Con. Vs. DON (1h)
	RNA transcripts that have changed due to deoxynivalenol (50 ug/mL) inclusion in Devosia mutans 17-2-E-8 growth media (1 hour).
	#	Transcript	Chromosome	Fold Change
	1	JP74_01440	JQGB01000002	∞
	2	JP74_09070	JQGB01000015	∞
	3	JP74_09365	JQGB01000015	∞
	4	JP74_11900	JQGB01000020	∞
	5	JP74_15975	JQGB01000027	∞
	6	JP74_18215	JQGB01000034	∞
	7	JP74_20885	JQGB01000047	∞
	8	JP74_21985	JQGB01000052	∞
	9	JP74_01845	JQGB01000002	15
	10	JP74_09595	JQGB01000015	14.55
	11	JP74_13050	JQGB01000021	14.04
	12	JP74_22535	JQGB01000057	12.23
	13	JP74_21935	JQGB01000052	11.95
	14	JP74_22490	JQGB01000056	10.71
	15	groEL	JQGB01000010	8.55
	16	JP74_03410	JQGB01000004	7.46
	17	clpA	JQGB01000002	7.38
	18	JP74_17325	JQGB01000032	7.33
	19	JP74_10055	JQGB01000016	6.93
	20	JP74_15595	JQGB01000027	6.24
	21	JP74_21360	JQGB01000048	6.24
	22	JP74_09965	JQGB01000016	5.98
	23	dnaK	JQGB01000009	5.91
	24	JP74_12615	JQGB01000021	5.64
	25	JP74_12045	JQGB01000020	5.54
	26	JP74_22435	JQGB01000055	5.37
	27	JP74_09570	JQGB01000015	5.2
	28	JP74_11585	JQGB01000020	5.2
	29	JP74_14215	JQGB01000023	5.2
	30	JP74_19600	JQGB01000038	5.2
	31	JP74_19940	JQGB01000040	5.2
	32	JP74_05320	JQGB01000009	5.16
	33	JP74_22495	JQGB01000056	5.07
	34	JP74_05215	JQGB01000009	4.99
	35	JP74_11650	JQGB01000020	4.99
	36	JP74_01995	JQGB01000002	4.94
	37	JP74_06575	JQGB01000010	4.85
	38	JP74_22385	JQGB01000055	4.85
	39	JP74_01750	JQGB01000002	4.68
	40	JP74_16575	JQGB01000028	4.57
	41	JP74_16240	JQGB01000027	4.5
	42	JP74_01345	JQGB01000002	4.5
	43	JP74_20775	JQGB01000045	4.5
	44	JP74_21375	JQGB01000048	4.45
	45	JP74_11705	JQGB01000020	4.42
	46	JP74_14850	JQGB01000025	4.4
	47	JP74_05880	JQGB01000009	4.37
	48	JP74_07055	JQGB01000012	4.16
	49	JP74_17445	JQGB01000033	4.16
	50	JP74_22320	JQGB01000054	4.16
	51	JP74_17605	JQGB01000033	4.1
	52	JP74_18455	JQGB01000035	4.08
	53	JP74_10580	JQGB01000018	4.04
	54	JP74_21300	JQGB01000048	4.03
	55	JP74_08010	JQGB01000012	4
	56	JP74_20835	JQGB01000046	3.96
	57	JP74_07935	JQGB01000012	3.93
	58	JP74_06425	JQGB01000010	3.9
	59	JP74_15550	JQGB01000026	3.86
	60	JP74_15355	JQGB01000026	3.83
	61	JP74_14770	JQGB01000025	3.82
	62	JP74_03835	JQGB01000005	3.81
	63	JP74_07645	JQGB01000012	3.81
	64	JP74_19055	JQGB01000036	3.81
	65	JP74_14995	JQGB01000025	3.8
	66	JP74_04860	JQGB01000008	3.79
	67	JP74_22595	JQGB01000060	3.76
	68	JP74_14305	JQGB01000024	3.73
	69	JP74_21630	JQGB01000049	3.72
	70	JP74_21725	JQGB01000050	3.71
	71	JP74_08565	JQGB01000014	3.7
	72	JP74_11825	JQGB01000020	3.67
	73	JP74_05095	JQGB01000009	3.67
	74	JP74_00365	JQGB01000001	3.66
	75	JP74_00690	JQGB01000001	3.64
	76	JP74_01870	JQGB01000002	3.64
	77	JP74_02540	JQGB01000002	3.64
	78	JP74_03245	JQGB01000004	3.64
	79	JP74_03395	JQGB01000004	3.64
	80	JP74_08215	JQGB01000012	3.64
	81	JP74_14990	JQGB01000025	3.64
	82	JP74_16660	JQGB01000028	3.64
	83	JP74_14210	JQGB01000023	3.63
	84	JP74_07370	JQGB01000012	3.61
	85	JP74_22155	JQGB01000052	3.59
	86	JP74_12820	JQGB01000021	3.56
	87	JP74_22375	JQGB01000055	3.54
	88	JP74_01470	JQGB01000002	3.53
	89	JP74_13055	JQGB01000021	3.53
	90	JP74_05025	JQGB01000009	3.53
	91	JP74_04165	JQGB01000006	3.51
	92	JP74_20685	JQGB01000045	3.51
	93	JP74_07220	JQGB01000012	3.5
	94	JP74_12575	JQGB01000021	3.49
	95	JP74_16710	JQGB01000029	3.48
	96	JP74_01245	JQGB01000002	3.46
	97	JP74_14680	JQGB01000025	3.46
	98	JP74_15260	JQGB01000026	3.46
	99	JP74_05100	JQGB01000009	3.45
	100	JP74_10215	JQGB01000016	3.45
	101	JP74_06815	JQGB01000011	3.45
	102	JP74_17640	JQGB01000034	3.44
	103	JP74_22275	JQGB01000054	3.42
	104	JP74_02975	JQGB01000004	3.42
	105	JP74_01475	JQGB01000002	3.4
	106	JP74_08560	JQGB01000014	3.4
	107	JP74_08035	JQGB01000012	3.39
	108	JP74_01350	JQGB01000002	3.38
	109	JP74_11540	JQGB01000020	3.38
	110	JP74_14040	JQGB01000022	3.38
	111	JP74_16745	JQGB01000029	3.38
	112	JP74_22600	JQGB01000060	3.38
	113	JP74_08315	JQGB01000013	3.38
	114	JP74_18075	JQGB01000034	3.38
	115	JP74_14225	JQGB01000023	3.37
	116	JP74_13775	JQGB01000022	3.35
	117	JP74_18965	JQGB01000036	3.34
	118	JP74_09580	JQGB01000015	3.34
	119	JP74_20290	JQGB01000042	3.33
	120	JP74_21030	JQGB01000047	3.33
	121	JP74_08585	JQGB01000014	3.33
	122	JP74_08695	JQGB01000014	3.33
	123	JP74_09460	JQGB01000015	3.33
	124	JP74_19520	JQGB01000037	3.33
	125	JP74_18935	JQGB01000036	3.31
	126	JP74_11670	JQGB01000020	3.31
	127	JP74_05670	JQGB01000009	3.27
	128	JP74_02925	JQGB01000004	3.27
	129	JP74_10385	JQGB01000017	3.26
	130	JP74_21500	JQGB01000049	3.26
	131	JP74_10930	JQGB01000018	3.25
	132	JP74_21270	JQGB01000048	3.25
	133	JP74_19360	JQGB01000036	3.25
	134	JP74_15375	JQGB01000026	3.24
	135	JP74_03550	JQGB01000004	3.23
	136	JP74_00230	JQGB01000001	3.23
	137	JP74_20840	JQGB01000046	3.23
	138	JP74_15265	JQGB01000026	3.23
	139	JP74_09865	JQGB01000015	3.23
	140	JP74_06885	JQGB01000011	3.22
	141	JP74_22210	JQGB01000054	3.22
	142	JP74_07860	JQGB01000012	3.21
	143	JP74_20780	JQGB01000045	3.2
	144	JP74_14870	JQGB01000025	3.2
	145	JP74_22150	JQGB01000052	3.2
	146	JP74_07665	JQGB01000012	3.2
	147	JP74_19390	JQGB01000036	3.2
	148	JP74_14700	JQGB01000025	3.2
	149	JP74_05935	JQGB01000009	3.19
	150	JP74_15045	JQGB01000025	3.18
	151	JP74_17120	JQGB01000030	3.18
	152	JP74_00345	JQGB01000001	3.17
	153	JP74_12230	JQGB01000021	3.17
	154	JP74_22190	JQGB01000053	3.16
	155	JP74_17580	JQGB01000033	3.16
	156	JP74_16765	JQGB01000029	3.15
	157	JP74_09765	JQGB01000015	3.15
	158	JP74_17410	JQGB01000033	3.14
	159	JP74_21490	JQGB01000049	3.14
	160	JP74_19785	JQGB01000038	3.13
	161	JP74_02570	JQGB01000002	3.12
	162	JP74_04010	JQGB01000005	3.12
	163	JP74_08115	JQGB01000012	3.12
	164	JP74_09560	JQGB01000015	3.12
	165	JP74_11240	JQGB01000020	3.12
	166	JP74_22335	JQGB01000054	3.12
	167	JP74_22450	JQGB01000056	3.12
	168	JP74_02045	JQGB01000002	3.12
	169	JP74_04505	JQGB01000006	3.12
	170	JP74_05940	JQGB01000009	3.12
	171	JP74_08950	JQGB01000014	3.12
	172	JP74_10855	JQGB01000018	3.12
	173	JP74_11310	JQGB01000020	3.12
	174	JP74_12065	JQGB01000020	3.12
	175	JP74_12800	JQGB01000021	3.12
	176	JP74_15110	JQGB01000026	3.12
	177	JP74_16270	JQGB01000027	3.12
	178	JP74_16630	JQGB01000028	3.12
	179	JP74_21125	JQGB01000047	3.12
	180	JP74_21945	JQGB01000052	3.12
	181	JP74_04020	JQGB01000005	3.12
	182	JP74_18925	JQGB01000036	3.12
	183	JP74_07865	JQGB01000012	3.11
	184	JP74_06650	JQGB01000011	3.1
	185	JP74_08265	JQGB01000013	3.1
	186	JP74_22960	JQGB01000072	3.09
	187	rocD	JQGB01000038	3.09
	188	JP74_16620	JQGB01000028	3.09
	189	JP74_16750	JQGB01000029	3.09
	190	JP74_14100	JQGB01000023	3.08
	191	JP74_07140	JQGB01000012	3.08
	192	JP74_19700	JQGB01000038	3.07
	193	JP74_22135	JQGB01000052	3.07
	194	JP74_06110	JQGB01000010	3.07
	195	JP74_19665	JQGB01000038	3.07
	196	JP74_07310	JQGB01000012	3.06
	197	JP74_12315	JQGB01000021	3.06
	198	JP74_00490	JQGB01000001	3.06
	199	JP74_09740	JQGB01000015	3.05
	200	JP74_19680	JQGB01000038	3.05
	201	JP74_21430	JQGB01000049	3.05
	202	JP74_17025	JQGB01000029	3.05
	203	JP74_09855	JQGB01000015	3.04
	204	JP74_02625	JQGB01000003	3.04
	205	JP74_14715	JQGB01000025	3.04
	206	JP74_09575	JQGB01000015	3.03
	207	JP74_10195	JQGB01000016	3.03
	208	JP74_17515	JQGB01000033	3.03
	209	JP74_19630	JQGB01000038	3.02
	210	JP74_21610	JQGB01000049	3.02
	211	JP74_09710	JQGB01000015	3.02
	212	JP74_14695	JQGB01000025	3.01
	213	JP74_20155	JQGB01000041	3.01
	214	JP74_10735	JQGB01000018	3.01
	215	JP74_05630	JQGB01000009	3
	216	JP74_03255	JQGB01000004	3
	217	JP74_14120	JQGB01000023	3
	218	JP74_15005	JQGB01000025	2.99
	219	JP74_16785	JQGB01000029	2.99
	220	JP74_18300	JQGB01000034	2.99
	221	JP74_08810	JQGB01000014	2.98
	222	JP74_01875	JQGB01000002	2.98
	223	JP74_09280	JQGB01000015	2.97
	224	JP74_18430	JQGB01000035	2.97
	225	JP74_14160	JQGB01000023	2.97
	226	JP74_08260	JQGB01000013	2.97
	227	JP74_05840	JQGB01000009	2.97
	228	JP74_05445	JQGB01000009	2.97
	229	JP74_16255	JQGB01000027	2.96
	230	ispG	JQGB01000036	2.96
	231	JP74_08320	JQGB01000013	2.96
	232	JP74_11475	JQGB01000020	2.96
	233	JP74_01760	JQGB01000002	2.95
	234	JP74_06240	JQGB01000010	2.95
	235	JP74_21365	JQGB01000048	2.95
	236	JP74_04620	JQGB01000006	2.95
	237	JP74_05610	JQGB01000009	2.95
	238	JP74_20175	JQGB01000041	2.95
	239	JP74_21520	JQGB01000049	2.94
	240	JP74_08570	JQGB01000014	2.94
	241	JP74_04900	JQGB01000008	2.93
	242	JP74_00285	JQGB01000001	2.93
	243	JP74_07180	JQGB01000012	2.93
	244	JP74_21995	JQGB01000052	2.93
	245	JP74_01395	JQGB01000002	2.93
	246	JP74_00115	JQGB01000001	2.93
	247	JP74_06700	JQGB01000011	2.93
	248	JP74_05800	JQGB01000009	2.92
	249	JP74_17785	JQGB01000034	2.92
	250	JP74_08305	JQGB01000013	2.91
	251	JP74_02915	JQGB01000004	2.91
	252	JP74_18600	JQGB01000035	2.91
	253	JP74_20790	JQGB01000045	2.91
	254	JP74_00095	JQGB01000001	2.91
	255	JP74_01975	JQGB01000002	2.91
	256	JP74_02330	JQGB01000002	2.91
	257	JP74_07770	JQGB01000012	2.91
	258	JP74_07830	JQGB01000012	2.91
	259	JP74_05810	JQGB01000009	2.91
	260	JP74_01955	JQGB01000002	2.9
	261	JP74_15065	JQGB01000025	2.9
	262	JP74_22965	JQGB01000072	2.9
	263	JP74_08710	JQGB01000014	2.9
	264	JP74_13075	JQGB01000021	2.9
	265	JP74_17400	JQGB01000033	2.9
	266	JP74_11205	JQGB01000019	2.9
	267	JP74_21260	JQGB01000048	2.9
	268	JP74_10635	JQGB01000018	2.9
	269	JP74_20140	JQGB01000041	2.89
	270	JP74_17125	JQGB01000030	2.89
	271	JP74_22975	JQGB01000072	2.89
	272	JP74_08310	JQGB01000013	2.89
	273	JP74_17770	JQGB01000034	2.89
	274	JP74_23045	JQGB01000076	2.89
	275	JP74_11890	JQGB01000020	2.88
	276	JP74_08605	JQGB01000014	2.88
	277	JP74_03465	JQGB01000004	2.88
	278	JP74_06235	JQGB01000010	2.88
	279	JP74_23130	JQGB01000081	2.88
	280	JP74_09150	JQGB01000015	2.87
	281	JP74_16960	JQGB01000029	2.87
	282	JP74_10965	JQGB01000018	2.87
	283	JP74_06630	JQGB01000011	2.86
	284	JP74_20435	JQGB01000043	2.86
	285	JP74_21080	JQGB01000047	2.86
	286	JP74_22350	JQGB01000054	2.86
	287	JP74_12570	JQGB01000021	2.86
	288	JP74_14575	JQGB01000024	2.86
	289	JP74_17610	JQGB01000033	2.86
	290	JP74_22355	JQGB01000054	2.86
	291	JP74_10605	JQGB01000018	2.86
	292	JP74_15915	JQGB01000027	2.86
	293	JP74_13105	JQGB01000021	2.85
	294	JP74_04740	JQGB01000007	2.85
	295	JP74_18090	JQGB01000034	2.85
	296	JP74_17775	JQGB01000034	2.85
	297	JP74_20595	JQGB01000045	2.85
	298	JP74_05030	JQGB01000009	2.84
	299	JP74_17865	JQGB01000034	2.84
	300	JP74_08775	JQGB01000014	2.84
	301	JP74_08650	JQGB01000014	2.84
	302	JP74_11450	JQGB01000020	2.84
	303	JP74_06225	JQGB01000010	2.84
	304	JP74_07520	JQGB01000012	2.84
	305	JP74_16095	JQGB01000027	2.84
	306	JP74_20665	JQGB01000045	2.84
	307	JP74_15570	JQGB01000027	2.84
	308	JP74_12465	JQGB01000021	2.83
	309	JP74_05355	JQGB01000009	2.83
	310	JP74_17750	JQGB01000034	2.83
	311	JP74_20065	JQGB01000040	2.83
	312	JP74_01805	JQGB01000002	2.83
	313	JP74_17530	JQGB01000033	2.83
	314	JP74_06095	JQGB01000010	2.83
	315	JP74_18980	JQGB01000036	2.83
	316	JP74_20830	JQGB01000046	2.82
	317	JP74_12710	JQGB01000021	2.82
	318	JP74_15275	JQGB01000026	2.82
	319	JP74_14890	JQGB01000025	2.82
	320	JP74_18220	JQGB01000034	2.82
	321	JP74_06745	JQGB01000011	2.82
	322	JP74_03590	JQGB01000004	2.81
	323	JP74_20690	JQGB01000045	2.81
	324	JP74_05685	JQGB01000009	2.81
	325	JP74_09875	JQGB01000015	2.81
	326	JP74_21040	JQGB01000047	2.81
	327	JP74_17550	JQGB01000033	2.81
	328	JP74_10130	JQGB01000016	2.8
	329	JP74_12345	JQGB01000021	2.8
	330	JP74_02285	JQGB01000002	2.8
	331	JP74_05975	JQGB01000009	2.79
	332	JP74_19490	JQGB01000037	2.79
	333	JP74_20625	JQGB01000045	2.79
	334	JP74_11210	JQGB01000019	2.79
	335	JP74_08615	JQGB01000014	2.79
	336	JP74_02810	JQGB01000003	2.79
	337	JP74_19495	JQGB01000037	2.79
	338	JP74_17340	JQGB01000033	2.79
	339	JP74_00975	JQGB01000002	2.78
	340	JP74_22395	JQGB01000055	2.78
	341	JP74_01450	JQGB01000002	2.78
	342	JP74_19450	JQGB01000037	2.77
	343	JP74_01200	JQGB01000002	2.77
	344	JP74_02670	JQGB01000003	2.77
	345	JP74_04515	JQGB01000006	2.77
	346	JP74_05195	JQGB01000009	2.77
	347	JP74_10025	JQGB01000016	2.77
	348	JP74_12310	JQGB01000021	2.77
	349	JP74_12485	JQGB01000021	2.77
	350	JP74_19415	JQGB01000036	2.77
	351	JP74_21920	JQGB01000052	2.77
	352	tdh	JQGB01000005	2.77
	353	JP74_09920	JQGB01000015	2.77
	354	JP74_12080	JQGB01000021	2.77
	355	JP74_21415	JQGB01000049	2.77
	356	JP74_19460	JQGB01000037	2.76
	357	JP74_21560	JQGB01000049	2.76
	358	JP74_05815	JQGB01000009	2.76
	359	JP74_02845	JQGB01000003	2.76
	360	JP74_22920	JQGB01000070	2.76
	361	JP74_19205	JQGB01000036	2.75
	362	JP74_22065	JQGB01000052	2.75
	363	JP74_15700	JQGB01000027	2.75
	364	JP74_22220	JQGB01000054	2.75
	365	JP74_01425	JQGB01000002	2.75
	366	JP74_02720	JQGB01000003	2.75
	367	dppD (JQGB01000033 31242..32268)	JQGB01000033	2.75
	368	JP74_16990	JQGB01000029	2.75
	369	JP74_21930	JQGB01000052	2.75
	370	JP74_07020	JQGB01000012	2.75
	371	JP74_08300	JQGB01000013	2.74
	372	JP74_07350	JQGB01000012	2.74
	373	JP74_13675	JQGB01000022	2.74
	374	JP74_03530	JQGB01000004	2.74
	375	JP74_08670	JQGB01000014	2.74
	376	JP74_15505	JQGB01000026	2.74
	377	JP74_22195	JQGB01000053	2.74
	378	JP74_00480	JQGB01000001	2.74
	379	JP74_16615	JQGB01000028	2.73
	380	JP74_17000	JQGB01000029	2.73
	381	JP74_22050	JQGB01000052	2.73
	382	JP74_17360	JQGB01000033	2.73
	383	JP74_17395	JQGB01000033	2.73
	384	JP74_17915	JQGB01000034	2.73
	385	JP74_01800	JQGB01000002	2.73
	386	JP74_14690	JQGB01000025	2.72
	387	JP74_19170	JQGB01000036	2.72
	388	JP74_20130	JQGB01000041	2.72
	389	JP74_15890	JQGB01000027	2.72
	390	JP74_00825	JQGB01000002	2.72
	391	JP74_00845	JQGB01000002	2.72
	392	JP74_02015	JQGB01000002	2.72
	393	JP74_09495	JQGB01000015	2.72
	394	JP74_15245	JQGB01000026	2.72
	395	JP74_20660	JQGB01000045	2.72
	396	JP74_17845	JQGB01000034	2.72
	397	JP74_22295	JQGB01000054	2.71
	398	JP74_21590	JQGB01000049	2.71
	399	JP74_05565	JQGB01000009	2.71
	400	JP74_22080	JQGB01000052	2.71
	401	JP74_21110	JQGB01000047	2.71
	402	JP74_08900	JQGB01000014	2.71
	403	JP74_19355	JQGB01000036	2.71
	404	JP74_10135	JQGB01000016	2.7
	405	JP74_19335	JQGB01000036	2.7
	406	JP74_04680	JQGB01000007	2.7
	407	JP74_15350	JQGB01000026	2.7
	408	JP74_17940	JQGB01000034	2.7
	409	JP74_23020	JQGB01000074	2.7
	410	JP74_09395	JQGB01000015	2.7
	411	JP74_12225	JQGB01000021	2.69
	412	JP74_21750	JQGB01000050	2.69
	413	JP74_19385	JQGB01000036	2.69
	414	JP74_08895	JQGB01000014	2.69
	415	JP74_00105	JQGB01000001	2.69
	416	JP74_11850	JQGB01000020	2.69
	417	JP74_08780	JQGB01000014	2.69
	418	JP74_14200	JQGB01000023	2.69
	419	JP74_03815	JQGB01000004	2.69
	420	JP74_07970	JQGB01000012	2.69
	421	JP74_14085	JQGB01000023	2.69
	422	JP74_21955	JQGB01000052	2.69
	423	JP74_03140	JQGB01000004	2.68
	424	JP74_12005	JQGB01000020	2.68
	425	JP74_12815	JQGB01000021	2.68
	426	JP74_10090	JQGB01000016	2.68
	427	JP74_01815	JQGB01000002	2.68
	428	JP74_00595	JQGB01000001	2.67
	429	JP74_05180	JQGB01000009	2.67
	430	JP74_11365	JQGB01000020	2.67
	431	JP74_21695	JQGB01000049	2.67
	432	JP74_21795	JQGB01000050	2.67
	433	JP74_22890	JQGB01000068	2.67
	434	JP74_04380	JQGB01000006	2.67
	435	JP74_19705	JQGB01000038	2.67
	436	JP74_18285	JQGB01000034	2.67
	437	JP74_04755	JQGB01000007	2.67
	438	JP74_17495	JQGB01000033	2.67
	439	JP74_20180	JQGB01000041	2.67
	440	JP74_10990	JQGB01000018	2.67
	441	JP74_00880	JQGB01000002	2.66
	442	JP74_14705	JQGB01000025	2.66
	443	JP74_06730	JQGB01000011	2.66
	444	cpdB	JQGB01000020	2.66
	445	JP74_12770	JQGB01000021	2.66
	446	JP74_17055	JQGB01000029	2.66
	447	JP74_19625	JQGB01000038	2.65
	448	JP74_17705	JQGB01000034	2.65
	449	JP74_17840	JQGB01000034	2.65
	450	JP74_09205	JQGB01000015	2.65
	451	JP74_20730	JQGB01000045	2.65
	452	phnK (JQGB01000012 10518..11295)	JQGB01000012	2.65
	453	JP74_06620	JQGB01000011	2.65
	454	JP74_16775	JQGB01000029	2.65
	455	JP74_19730	JQGB01000038	2.65
	456	JP74_08340	JQGB01000013	2.65
	457	JP74_11175	JQGB01000019	2.65
	458	JP74_13650	JQGB01000022	2.65
	459	JP74_07585	JQGB01000012	2.65
	460	JP74_07105	JQGB01000012	2.64
	461	JP74_07505	JQGB01000012	2.64
	462	JP74_07815	JQGB01000012	2.64
	463	JP74_00610	JQGB01000001	2.64
	464	JP74_09790	JQGB01000015	2.64
	465	JP74_06910	JQGB01000011	2.64
	466	JP74_10125	JQGB01000016	2.63
	467	JP74_19375	JQGB01000036	2.63
	468	JP74_17855	JQGB01000034	2.63
	469	JP74_01360	JQGB01000002	2.63
	470	JP74_02850	JQGB01000003	2.63
	471	JP74_09725	JQGB01000015	2.62
	472	JP74_12350	JQGB01000021	2.62
	473	JP74_20605	JQGB01000045	2.62
	474	JP74_04700	JQGB01000007	2.62
	475	JP74_16965	JQGB01000029	2.62
	476	JP74_13295	JQGB01000022	2.62
	477	JP74_21255	JQGB01000048	2.62
	478	JP74_15040	JQGB01000025	2.62
	479	JP74_22540	JQGB01000058	2.62
	480	JP74_00025	JQGB01000001	2.62
	481	JP74_09850	JQGB01000015	2.61
	482	JP74_10890	JQGB01000018	2.61
	483	JP74_04215	JQGB01000006	2.61
	484	JP74_14015	JQGB01000022	2.61
	485	JP74_08285	JQGB01000013	2.61
	486	JP74_16285	JQGB01000027	2.61
	487	JP74_17210	JQGB01000031	2.61
	488	JP74_04595	JQGB01000006	2.61
	489	JP74_02620	JQGB01000002	2.61
	490	JP74_15930	JQGB01000027	2.61
	491	JP74_00710	JQGB01000001	2.6
	492	JP74_01415	JQGB01000002	2.6
	493	JP74_08995	JQGB01000015	2.6
	494	JP74_14325	JQGB01000024	2.6
	495	JP74_14865	JQGB01000025	2.6
	496	JP74_19470	JQGB01000037	2.6
	497	JP74_20675	JQGB01000045	2.6
	498	JP74_21280	JQGB01000048	2.6
	499	JP74_22015	JQGB01000052	2.6
	500	JP74_00225	JQGB01000001	2.6
	501	JP74_01410	JQGB01000002	2.6
	502	JP74_02410	JQGB01000002	2.6
	503	JP74_02520	JQGB01000002	2.6
	504	JP74_02970	JQGB01000004	2.6
	505	JP74_04385	JQGB01000006	2.6
	506	JP74_06615	JQGB01000011	2.6
	507	JP74_11620	JQGB01000020	2.6
	508	JP74_12725	JQGB01000021	2.6
	509	JP74_14505	JQGB01000024	2.6
	510	JP74_16685	JQGB01000029	2.6
	511	JP74_17035	JQGB01000029	2.6
	512	JP74_17595	JQGB01000033	2.6
	513	JP74_17960	JQGB01000034	2.59
	514	JP74_04500	JQGB01000006	2.59
	515	JP74_17540	JQGB01000033	2.59
	516	JP74_13875	JQGB01000022	2.59
	517	JP74_03700	JQGB01000004	2.59
	518	JP74_19950	JQGB01000040	2.59
	519	JP74_21075	JQGB01000047	2.59
	520	JP74_17740	JQGB01000034	2.59
	521	JP74_21790	JQGB01000050	2.59
	522	JP74_06690	JQGB01000011	2.59
	523	JP74_17425	JQGB01000033	2.59
	524	JP74_08450	JQGB01000013	2.59
	525	JP74_02795	JQGB01000003	2.59
	526	JP74_06995	JQGB01000012	2.59
	527	JP74_01885	JQGB01000002	2.58
	528	JP74_05895	JQGB01000009	2.58
	529	JP74_01530	JQGB01000002	2.58
	530	JP74_06665	JQGB01000011	2.58
	531	JP74_09220	JQGB01000015	2.58
	532	JP74_16550	JQGB01000027	2.58
	533	JP74_12830	JQGB01000021	2.58
	534	JP74_22850	JQGB01000067	2.58
	535	JP74_21875	JQGB01000050	2.58
	536	JP74_21975	JQGB01000052	2.58
	537	JP74_10080	JQGB01000016	2.58
	538	JP74_11945	JQGB01000020	2.57
	539	JP74_00125	JQGB01000001	2.57
	540	JP74_08765	JQGB01000014	2.57
	541	JP74_22105	JQGB01000052	2.57
	542	JP74_22380	JQGB01000055	2.57
	543	JP74_09030	JQGB01000015	2.57
	544	JP74_11470	JQGB01000020	2.57
	545	JP74_21055	JQGB01000047	2.57
	546	JP74_21310	JQGB01000048	2.57
	547	JP74_01890	JQGB01000002	2.57
	548	JP74_16985	JQGB01000029	2.57
	549	JP74_07375	JQGB01000012	2.57
	550	JP74_19650	JQGB01000038	2.56
	551	JP74_06565	JQGB01000010	2.56
	552	JP74_00255	JQGB01000001	2.56
	553	JP74_16900	JQGB01000029	2.56
	554	JP74_05325	JQGB01000009	2.56
	555	JP74_17205	JQGB01000031	2.56
	556	JP74_22500	JQGB01000056	2.56
	557	JP74_13080	JQGB01000021	2.56
	558	JP74_23035	JQGB01000076	2.56
	559	JP74_23040	JQGB01000076	2.56
	560	JP74_09835	JQGB01000015	2.56
	561	JP74_16980	JQGB01000029	2.56
	562	JP74_04265	JQGB01000006	2.56
	563	JP74_14825	JQGB01000025	2.56
	564	JP74_22085	JQGB01000052	2.55
	565	JP74_20705	JQGB01000045	2.55
	566	JP74_16945	JQGB01000029	2.55
	567	JP74_18795	JQGB01000035	2.55
	568	JP74_08975	JQGB01000015	2.55
	569	JP74_18995	JQGB01000036	2.55
	570	JP74_06370	JQGB01000010	2.55
	571	JP74_03200	JQGB01000004	2.54
	572	JP74_18445	JQGB01000035	2.54
	573	JP74_16090	JQGB01000027	2.54
	574	JP74_07940	JQGB01000012	2.54
	575	JP74_18130	JQGB01000034	2.54
	576	JP74_17830	JQGB01000034	2.54
	577	JP74_22225	JQGB01000054	2.54
	578	JP74_04330	JQGB01000006	2.54
	579	JP74_08785	JQGB01000014	2.54
	580	JP74_15145	JQGB01000026	2.54
	581	JP74_15825	JQGB01000027	2.54
	582	JP74_18190	JQGB01000034	2.54
	583	JP74_22755	JQGB01000063	2.54
	584	JP74_15580	JQGB01000027	2.54
	585	JP74_05305	JQGB01000009	2.54
	586	JP74_18255	JQGB01000034	2.54
	587	JP74_17970	JQGB01000034	2.54
	588	JP74_19835	JQGB01000039	2.54
	589	JP74_05545	JQGB01000009	2.54
	590	JP74_12590	JQGB01000021	2.54
	591	JP74_21620	JQGB01000049	2.53
	592	JP74_12300	JQGB01000021	2.53
	593	JP74_15210	JQGB01000026	2.53
	594	JP74_10180	JQGB01000016	2.53
	595	JP74_14500	JQGB01000024	2.53
	596	JP74_08985	JQGB01000015	2.53
	597	JP74_18320	JQGB01000034	2.53
	598	JP74_11535	JQGB01000020	2.53
	599	JP74_08425	JQGB01000013	2.53
	600	JP74_12660	JQGB01000021	2.53
	601	JP74_08405	JQGB01000013	2.52
	602	JP74_17355	JQGB01000033	2.52
	603	JP74_17820	JQGB01000034	2.52
	604	JP74_21330	JQGB01000048	2.52
	605	JP74_21830	JQGB01000050	2.52
	606	JP74_00535	JQGB01000001	2.52
	607	JP74_05595	JQGB01000009	2.52
	608	JP74_08335	JQGB01000013	2.52
	609	JP74_22460	JQGB01000056	2.52
	610	JP74_21020	JQGB01000047	2.52
	611	JP74_12510	JQGB01000021	2.52
	612	JP74_19350	JQGB01000036	2.52
	613	JP74_03820	JQGB01000004	2.52
	614	JP74_20795	JQGB01000045	2.52
	615	JP74_00370	JQGB01000001	2.52
	616	JP74_02815	JQGB01000003	2.52
	617	JP74_20670	JQGB01000045	2.52
	618	JP74_03445	JQGB01000004	2.52
	619	JP74_10630	JQGB01000018	2.52
	620	JP74_13140	JQGB01000022	2.52
	621	JP74_05515	JQGB01000009	2.52
	622	JP74_15765	JQGB01000027	2.51
	623	JP74_15465	JQGB01000026	2.51
	624	JP74_07280	JQGB01000012	2.51
	625	JP74_08550	JQGB01000014	2.51
	626	JP74_10045	JQGB01000016	2.51
	627	JP74_10095	JQGB01000016	2.51
	628	JP74_15335	JQGB01000026	2.51
	629	JP74_20035	JQGB01000040	2.51
	630	JP74_19420	JQGB01000036	2.51
	631	JP74_19755	JQGB01000038	2.51
	632	JP74_20620	JQGB01000045	2.51
	633	JP74_06280	JQGB01000010	2.51
	634	JP74_05240	JQGB01000009	2.51
	635	JP74_08435	JQGB01000013	2.51
	636	JP74_15025	JQGB01000025	2.51
	637	JP74_16595	JQGB01000028	2.51
	638	JP74_09270	JQGB01000015	2.51
	639	JP74_02645	JQGB01000003	2.5
	640	JP74_05945	JQGB01000009	2.5
	641	JP74_08095	JQGB01000012	2.5
	642	JP74_14855	JQGB01000025	2.5
	643	JP74_12700	JQGB01000021	2.5
	644	JP74_19545	JQGB01000037	2.5
	645	JP74_21105	JQGB01000047	2.5
	646	JP74_19345	JQGB01000036	2.5
	647	JP74_00750	JQGB01000002	2.5
	648	JP74_08370	JQGB01000013	2.5
	649	JP74_18280	JQGB01000034	2.5
	650	JP74_00190	JQGB01000001	2.5
	651	JP74_02725	JQGB01000003	2.49
	652	JP74_03595	JQGB01000004	2.49
	653	JP74_04485	JQGB01000006	2.49
	654	JP74_13815	JQGB01000022	2.49
	655	JP74_15515	JQGB01000026	2.49
	656	JP74_17010	JQGB01000029	2.49
	657	JP74_21115	JQGB01000047	2.49
	658	JP74_21390	JQGB01000048	2.49
	659	JP74_22875	JQGB01000067	2.49
	660	JP74_13065	JQGB01000021	2.49
	661	JP74_23135	JQGB01000081	2.49
	662	JP74_14440	JQGB01000024	2.49
	663	JP74_13220	JQGB01000022	2.49
	664	JP74_05640	JQGB01000009	2.49
	665	JP74_03115	JQGB01000004	2.49
	666	JP74_18970	JQGB01000036	2.49
	667	JP74_05330	JQGB01000009	2.49
	668	JP74_11080	JQGB01000019	2.49
	669	JP74_01400	JQGB01000002	2.49
	670	JP74_12580	JQGB01000021	2.49
	671	JP74_21805	JQGB01000050	2.49
	672	JP74_05115	JQGB01000009	2.49
	673	JP74_16780	JQGB01000029	2.49
	674	JP74_00590	JQGB01000001	2.49
	675	JP74_01925	JQGB01000002	2.48
	676	JP74_02390	JQGB01000002	2.48
	677	JP74_09700	JQGB01000015	2.48
	678	JP74_09880	JQGB01000015	2.48
	679	JP74_04340	JQGB01000006	2.48
	680	JP74_05785	JQGB01000009	2.48
	681	JP74_10440	JQGB01000017	2.48
	682	JP74_01820	JQGB01000002	2.48
	683	JP74_17510	JQGB01000033	2.48
	684	JP74_21580	JQGB01000049	2.48
	685	JP74_10150	JQGB01000016	2.48
	686	JP74_03785	JQGB01000004	2.48
	687	JP74_22125	JQGB01000052	2.48
	688	JP74_03740	JQGB01000004	2.48
	689	JP74_16970	JQGB01000029	2.48
	690	JP74_05920	JQGB01000009	2.47
	691	JP74_02760	JQGB01000003	2.47
	692	JP74_06750	JQGB01000011	2.47
	693	JP74_19320	JQGB01000036	2.47
	694	JP74_17950	JQGB01000034	2.47
	695	JP74_14540	JQGB01000024	2.47
	696	JP74_18035	JQGB01000034	2.47
	697	JP74_14550	JQGB01000024	2.47
	698	JP74_15070	JQGB01000025	2.47
	699	JP74_20165	JQGB01000041	2.47
	700	JP74_06660	JQGB01000011	2.47
	701	JP74_14095	JQGB01000023	2.47
	702	JP74_15600	JQGB01000027	2.47
	703	JP74_20350	JQGB01000043	2.47
	704	JP74_06285	JQGB01000010	2.47
	705	JP74_19180	JQGB01000036	2.47
	706	JP74_19765	JQGB01000038	2.47
	707	JP74_04045	JQGB01000005	2.47
	708	JP74_05870	JQGB01000009	2.47
	709	JP74_05535	JQGB01000009	2.46
	710	JP74_17005	JQGB01000029	2.46
	711	JP74_11430	JQGB01000020	2.46
	712	JP74_15745	JQGB01000027	2.46
	713	JP74_20635	JQGB01000045	2.46
	714	JP74_12565	JQGB01000021	2.46
	715	JP74_09185	JQGB01000015	2.46
	716	JP74_04785	JQGB01000007	2.46
	717	JP74_08100	JQGB01000012	2.46
	718	JP74_12670	JQGB01000021	2.46
	719	JP74_17110	JQGB01000030	2.46
	720	JP74_13260	JQGB01000022	2.46
	721	JP74_11460	JQGB01000020	2.46
	722	JP74_00085	JQGB01000001	2.46
	723	JP74_00340	JQGB01000001	2.46
	724	JP74_21510	JQGB01000049	2.46
	725	JP74_02560	JQGB01000002	2.46
	726	JP74_22690	JQGB01000062	2.46
	727	JP74_03790	JQGB01000004	2.46
	728	JP74_23305	JQGB01000093	2.46
	729	JP74_21370	JQGB01000048	2.45
	730	JP74_05205	JQGB01000009	2.45
	731	JP74_21615	JQGB01000049	2.45
	732	JP74_09330	JQGB01000015	2.45
	733	JP74_10710	JQGB01000018	2.45
	734	JP74_12305	JQGB01000021	2.45
	735	JP74_16915	JQGB01000029	2.45
	736	JP74_15175	JQGB01000026	2.45
	737	JP74_03470	JQGB01000004	2.45
	738	JP74_03665	JQGB01000004	2.45
	739	JP74_03950	JQGB01000005	2.45
	740	JP74_12470	JQGB01000021	2.45
	741	JP74_21000	JQGB01000047	2.45
	742	JP74_08820	JQGB01000014	2.45
	743	JP74_22230	JQGB01000054	2.45
	744	JP74_07990	JQGB01000012	2.45
	745	JP74_04790	JQGB01000007	2.44
	746	JP74_21230	JQGB01000047	2.44
	747	JP74_18380	JQGB01000035	2.44
	748	JP74_08080	JQGB01000012	2.44
	749	JP74_18135	JQGB01000034	2.44
	750	JP74_00930	JQGB01000002	2.44
	751	JP74_16100	JQGB01000027	2.44
	752	JP74_08970	JQGB01000015	2.44
	753	JP74_11120	JQGB01000019	2.44
	754	JP74_17715	JQGB01000034	2.44
	755	JP74_03585	JQGB01000004	2.44
	756	JP74_16055	JQGB01000027	2.44
	757	JP74_20710	JQGB01000045	2.44
	758	JP74_22840	JQGB01000067	2.44
	759	JP74_21845	JQGB01000050	2.43
	760	JP74_07530	JQGB01000012	2.43
	761	JP74_12995	JQGB01000021	2.43
	762	JP74_09660	JQGB01000015	2.43
	763	JP74_14370	JQGB01000024	2.43
	764	JP74_04195	JQGB01000006	2.43
	765	JP74_19595	JQGB01000038	2.43
	766	JP74_12290	JQGB01000021	2.43
	767	JP74_22070	JQGB01000052	2.43
	768	JP74_18435	JQGB01000035	2.43
	769	JP74_00310	JQGB01000001	2.43
	770	JP74_00360	JQGB01000001	2.43
	771	JP74_02130	JQGB01000002	2.43
	772	JP74_05510	JQGB01000009	2.43
	773	JP74_06765	JQGB01000011	2.43
	774	JP74_08360	JQGB01000013	2.43
	775	JP74_09735	JQGB01000015	2.43
	776	JP74_15495	JQGB01000026	2.43
	777	JP74_16770	JQGB01000029	2.43
	778	JP74_16885	JQGB01000029	2.43
	779	JP74_19310	JQGB01000036	2.43
	780	JP74_19710	JQGB01000038	2.43
	781	JP74_07910	JQGB01000012	2.43
	782	JP74_17600	JQGB01000033	2.43
	783	JP74_21555	JQGB01000049	2.43
	784	JP74_22695	JQGB01000062	2.43
	785	JP74_12795	JQGB01000021	2.42
	786	JP74_08735	JQGB01000014	2.42
	787	JP74_08660	JQGB01000014	2.42
	788	JP74_08790	JQGB01000014	2.42
	789	JP74_06185	JQGB01000010	2.42
	790	JP74_20865	JQGB01000047	2.42
	791	JP74_05590	JQGB01000009	2.42
	792	JP74_02805	JQGB01000003	2.42
	793	JP74_17825	JQGB01000034	2.42
	794	JP74_17040	JQGB01000029	2.42
	795	JP74_16920	JQGB01000029	2.42
	796	JP74_17765	JQGB01000034	2.42
	797	JP74_01270	JQGB01000002	2.42
	798	JP74_12640	JQGB01000021	2.42
	799	JP74_09905	JQGB01000015	2.42
	800	JP74_22160	JQGB01000052	2.41
	801	JP74_07305	JQGB01000012	2.41
	802	JP74_16260	JQGB01000027	2.41
	803	JP74_19775	JQGB01000038	2.41
	804	JP74_06795	JQGB01000011	2.41
	805	JP74_03945	JQGB01000005	2.41
	806	JP74_08635	JQGB01000014	2.41
	807	JP74_06300	JQGB01000010	2.41
	808	JP74_10975	JQGB01000018	2.41
	809	JP74_11605	JQGB01000020	2.41
	810	JP74_04050	JQGB01000005	2.41
	811	JP74_15185	JQGB01000026	2.41
	812	JP74_14115	JQGB01000023	2.41
	813	JP74_11350	JQGB01000020	2.41
	814	JP74_22940	JQGB01000072	2.41
	815	JP74_00305	JQGB01000001	2.41
	816	JP74_21625	JQGB01000049	2.41
	817	JP74_07515	JQGB01000012	2.41
	818	JP74_08250	JQGB01000012	2.41
	819	JP74_12085	JQGB01000021	2.41
	820	JP74_19610	JQGB01000038	2.4
	821	JP74_09685	JQGB01000015	2.4
	822	JP74_10070	JQGB01000016	2.4
	823	JP74_17335	JQGB01000033	2.4
	824	JP74_17645	JQGB01000034	2.4
	825	JP74_10320	JQGB01000017	2.4
	826	JP74_22585	JQGB01000059	2.4
	827	JP74_11055	JQGB01000019	2.4
	828	JP74_16025	JQGB01000027	2.4
	829	JP74_02030	JQGB01000002	2.4
	830	JP74_06430	JQGB01000010	2.4
	831	JP74_17555	JQGB01000033	2.4
	832	JP74_19430	JQGB01000036	2.4
	833	JP74_03500	JQGB01000004	2.4
	834	JP74_06760	JQGB01000011	2.4
	835	JP74_11885	JQGB01000020	2.4
	836	JP74_21605	JQGB01000049	2.4
	837	JP74_21325	JQGB01000048	2.4
	838	JP74_20565	JQGB01000045	2.4
	839	JP74_14125	JQGB01000023	2.4
	840	JP74_19550	JQGB01000037	2.4
	841	JP74_11335	JQGB01000020	2.4
	842	JP74_11165	JQGB01000019	2.39
	843	JP74_02140	JQGB01000002	2.39
	844	JP74_18275	JQGB01000034	2.39
	845	JP74_00530	JQGB01000001	2.39
	846	JP74_12965	JQGB01000021	2.39
	847	JP74_15230	JQGB01000026	2.39
	848	JP74_06600	JQGB01000011	2.39
	849	JP74_10310	JQGB01000017	2.39
	850	JP74_12685	JQGB01000021	2.39
	851	JP74_18370	JQGB01000035	2.39
	852	JP74_22480	JQGB01000056	2.39
	853	JP74_22075	JQGB01000052	2.39
	854	JP74_23260	JQGB01000091	2.39
	855	JP74_14790	JQGB01000025	2.39
	856	JP74_15445	JQGB01000026	2.39
	857	JP74_05190	JQGB01000009	2.39
	858	JP74_18940	JQGB01000036	2.39
	859	JP74_07165	JQGB01000012	2.39
	860	JP74_12990	JQGB01000021	2.39
	861	JP74_23025	JQGB01000074	2.39
	862	JP74_08400	JQGB01000013	2.39
	863	JP74_04310	JQGB01000006	2.39
	864	JP74_17375	JQGB01000033	2.39
	865	JP74_01535	JQGB01000002	2.38
	866	JP74_15305	JQGB01000026	2.38
	867	JP74_23085	JQGB01000079	2.38
	868	JP74_00985	JQGB01000002	2.38
	869	JP74_05600	JQGB01000009	2.38
	870	JP74_22815	JQGB01000067	2.38
	871	JP74_12705	JQGB01000021	2.38
	872	JP74_08210	JQGB01000012	2.38
	873	JP74_04810	JQGB01000007	2.38
	874	JP74_12295	JQGB01000021	2.38
	875	JP74_07155	JQGB01000012	2.38
	876	JP74_17615	JQGB01000033	2.38
	877	JP74_14365	JQGB01000024	2.38
	878	JP74_00295	JQGB01000001	2.38
	879	JP74_13685	JQGB01000022	2.38
	880	JP74_03930	JQGB01000005	2.38
	881	JP74_15990	JQGB01000027	2.38
	882	JP74_17710	JQGB01000034	2.38
	883	JP74_19760	JQGB01000038	2.38
	884	JP74_20020	JQGB01000040	2.38
	885	JP74_21505	JQGB01000049	2.38
	886	JP74_05540	JQGB01000009	2.37
	887	JP74_22605	JQGB01000060	2.37
	888	JP74_14475	JQGB01000024	2.37
	889	pdxA	JQGB01000018	2.37
	890	JP74_01480	JQGB01000002	2.37
	891	JP74_11655	JQGB01000020	2.37
	892	JP74_09295	JQGB01000015	2.37
	893	JP74_11865	JQGB01000020	2.37
	894	JP74_03375	JQGB01000004	2.37
	895	JP74_21685	JQGB01000049	2.37
	896	JP74_08330	JQGB01000013	2.37
	897	JP74_11485	JQGB01000020	2.37
	898	JP74_15470	JQGB01000026	2.37
	899	JP74_18210	JQGB01000034	2.37
	900	JP74_01325	JQGB01000002	2.37
	901	JP74_19825	JQGB01000039	2.37
	902	JP74_18265	JQGB01000034	2.37
	903	JP74_12980	JQGB01000021	2.36
	904	JP74_19075	JQGB01000036	2.36
	905	JP74_06560	JQGB01000010	2.36
	906	JP74_06355	JQGB01000010	2.36
	907	JP74_14915	JQGB01000025	2.36
	908	JP74_21515	JQGB01000049	2.36
	909	JP74_00070	JQGB01000001	2.36
	910	JP74_06190	JQGB01000010	2.36
	911	JP74_08390	JQGB01000013	2.36
	912	JP74_10050	JQGB01000016	2.36
	913	JP74_20945	JQGB01000047	2.36
	914	JP74_18605	JQGB01000035	2.36
	915	tbpA	JQGB01000001	2.36
	916	JP74_06010	JQGB01000010	2.36
	917	JP74_08025	JQGB01000012	2.36
	918	JP74_02860	JQGB01000003	2.36
	919	JP74_13005	JQGB01000021	2.36
	920	JP74_22030	JQGB01000052	2.35
	921	JP74_18140	JQGB01000034	2.35
	922	JP74_13525	JQGB01000022	2.35
	923	JP74_00350	JQGB01000001	2.35
	924	JP74_21635	JQGB01000049	2.35
	925	JP74_04230	JQGB01000006	2.35
	926	JP74_21035	JQGB01000047	2.35
	927	JP74_23005	JQGB01000073	2.35
	928	JP74_14755	JQGB01000025	2.35
	929	JP74_00050	JQGB01000001	2.35
	930	JP74_21535	JQGB01000049	2.35
	931	JP74_21740	JQGB01000050	2.35
	932	JP74_04405	JQGB01000006	2.35
	933	JP74_11940	JQGB01000020	2.35
	934	JP74_20655	JQGB01000045	2.35
	935	JP74_03070	JQGB01000004	2.35
	936	JP74_06570	JQGB01000010	2.35
	937	JP74_04855	JQGB01000008	2.34
	938	JP74_07545	JQGB01000012	2.34
	939	JP74_12390	JQGB01000021	2.34
	940	JP74_03795	JQGB01000004	2.34
	941	JP74_08890	JQGB01000014	2.34
	942	JP74_12400	JQGB01000021	2.34
	943	JP74_23140	JQGB01000081	2.34
	944	JP74_05145	JQGB01000009	2.34
	945	JP74_08835	JQGB01000014	2.34
	946	JP74_18315	JQGB01000034	2.34
	947	JP74_14750	JQGB01000025	2.34
	948	JP74_00685	JQGB01000001	2.34
	949	JP74_00335	JQGB01000001	2.34
	950	JP74_12355	JQGB01000021	2.34
	951	JP74_13250	JQGB01000022	2.34
	952	JP74_19770	JQGB01000038	2.34
	953	JP74_02565	JQGB01000002	2.34
	954	JP74_04970	JQGB01000009	2.34
	955	JP74_05980	JQGB01000009	2.34
	956	JP74_07120	JQGB01000012	2.34
	957	JP74_08015	JQGB01000012	2.34
	958	JP74_16760	JQGB01000029	2.34
	959	JP74_17990	JQGB01000034	2.34
	960	JP74_18930	JQGB01000036	2.34
	961	JP74_19130	JQGB01000036	2.34
	962	JP74_19235	JQGB01000036	2.34
	963	JP74_20880	JQGB01000047	2.34
	964	JP74_21760	JQGB01000050	2.34
	965	JP74_05555	JQGB01000009	2.34
	966	gabD (JQGB01000004 165925..167383)	JQGB01000004	2.34
	967	JP74_18805	JQGB01000035	2.34
	968	flhA	JQGB01000001	2.34
	969	JP74_03425	JQGB01000004	2.34
	970	JP74_22140	JQGB01000052	2.33
	971	JP74_07025	JQGB01000012	2.33
	972	JP74_18565	JQGB01000035	2.33
	973	JP74_18880	JQGB01000035	2.33
	974	JP74_20615	JQGB01000045	2.33
	975	JP74_08675	JQGB01000014	2.33
	976	JP74_12865	JQGB01000021	2.33
	977	JP74_04105	JQGB01000006	2.33
	978	JP74_14190	JQGB01000023	2.33
	979	JP74_14430	JQGB01000024	2.33
	980	JP74_02755	JQGB01000003	2.33
	981	JP74_16940	JQGB01000029	2.33
	982	JP74_01195	JQGB01000002	2.33
	983	JP74_04035	JQGB01000005	2.33
	984	JP74_08910	JQGB01000014	2.33
	985	JP74_09715	JQGB01000015	2.33
	986	JP74_11520	JQGB01000020	2.33
	987	JP74_15195	JQGB01000026	2.33
	988	JP74_21315	JQGB01000048	2.33
	989	JP74_11345	JQGB01000020	2.33
	990	JP74_17490	JQGB01000033	2.32
	991	JP74_04100	JQGB01000006	2.32
	992	JP74_09275	JQGB01000015	2.32
	993	JP74_12395	JQGB01000021	2.32
	994	JP74_15225	JQGB01000026	2.32
	995	JP74_16880	JQGB01000029	2.32
	996	JP74_22090	JQGB01000052	2.32
	997	JP74_00440	JQGB01000001	2.32
	998	JP74_14555	JQGB01000024	2.32
	999	JP74_20680	JQGB01000045	2.32
	1000	JP74_05570	JQGB01000009	2.32
	1001	JP74_19135	JQGB01000036	2.32
	1002	JP74_09255	JQGB01000015	2.32
	1003	JP74_18160	JQGB01000034	2.32
	1004	JP74_16245	JQGB01000027	2.32
	1005	JP74_01520	JQGB01000002	2.32
	1006	JP74_05135	JQGB01000009	2.32
	1007	JP74_05875	JQGB01000009	2.32
	1008	JP74_13475	JQGB01000022	2.32
	1009	JP74_21870	JQGB01000050	2.32
	1010	JP74_22625	JQGB01000060	2.32
	1011	JP74_20645	JQGB01000045	2.32
	1012	clpP	JQGB01000040	2.32
	1013	JP74_07540	JQGB01000012	2.32
	1014	JP74_12970	JQGB01000021	2.32
	1015	JP74_18755	JQGB01000035	2.32
	1016	JP74_20585	JQGB01000045	2.32
	1017	JP74_21025	JQGB01000047	2.32
	1018	JP74_22550	JQGB01000059	2.32
	1019	JP74_22040	JQGB01000052	2.32
	1020	JP74_06965	JQGB01000012	2.31
	1021	JP74_06465	JQGB01000010	2.31
	1022	JP74_06550	JQGB01000010	2.31
	1023	JP74_16910	JQGB01000029	2.31
	1024	JP74_12425	JQGB01000021	2.31
	1025	JP74_10335	JQGB01000017	2.31
	1026	JP74_09090	JQGB01000015	2.31
	1027	JP74_11935	JQGB01000020	2.31
	1028	JP74_12495	JQGB01000021	2.31
	1029	JP74_05635	JQGB01000009	2.31
	1030	JP74_07660	JQGB01000012	2.31
	1031	JP74_08520	JQGB01000014	2.31
	1032	JP74_15560	JQGB01000026	2.31
	1033	JP74_18945	JQGB01000036	2.31
	1034	JP74_20395	JQGB01000043	2.31
	1035	JP74_15240	JQGB01000026	2.31
	1036	JP74_09885	JQGB01000015	2.31
	1037	JP74_17535	JQGB01000033	2.31
	1038	JP74_00375	JQGB01000001	2.31
	1039	JP74_02660	JQGB01000003	2.31
	1040	JP74_08225	JQGB01000012	2.31
	1041	JP74_00730	JQGB01000002	2.31
	1042	JP74_01405	JQGB01000002	2.3
	1043	JP74_04975	JQGB01000009	2.3
	1044	JP74_09515	JQGB01000015	2.3
	1045	JP74_06705	JQGB01000011	2.3
	1046	JP74_00250	JQGB01000001	2.3
	1047	JP74_12975	JQGB01000021	2.3
	1048	JP74_17910	JQGB01000034	2.3
	1049	JP74_06870	JQGB01000011	2.3
	1050	JP74_08020	JQGB01000012	2.3
	1051	JP74_14445	JQGB01000024	2.3
	1052	JP74_00555	JQGB01000001	2.3
	1053	JP74_16265	JQGB01000027	2.3
	1054	JP74_04545	JQGB01000006	2.3
	1055	JP74_05400	JQGB01000009	2.3
	1056	JP74_11280	JQGB01000020	2.3
	1057	JP74_02455	JQGB01000002	2.3
	1058	JP74_09140	JQGB01000015	2.3
	1059	JP74_19240	JQGB01000036	2.3
	1060	JP74_20630	JQGB01000045	2.3
	1061	JP74_09305	JQGB01000015	2.3
	1062	JP74_22100	JQGB01000052	2.3
	1063	JP74_10355	JQGB01000017	2.3
	1064	JP74_06920	JQGB01000011	2.3
	1065	JP74_17045	JQGB01000029	2.3
	1066	JP74_22095	JQGB01000052	2.3
	1067	flbT	JQGB01000002	2.3
	1068	JP74_09550	JQGB01000015	2.29
	1069	JP74_11800	JQGB01000020	2.29
	1070	JP74_18525	JQGB01000035	2.29
	1071	JP74_04205	JQGB01000006	2.29
	1072	JP74_21585	JQGB01000049	2.29
	1073	JP74_05440	JQGB01000009	2.29
	1074	JP74_06180	JQGB01000010	2.29
	1075	JP74_19065	JQGB01000036	2.29
	1076	JP74_22060	JQGB01000052	2.29
	1077	JP74_00325	JQGB01000001	2.29
	1078	JP74_12595	JQGB01000021	2.29
	1079	JP74_02090	JQGB01000002	2.29
	1080	JP74_21345	JQGB01000048	2.29
	1081	JP74_21600	JQGB01000049	2.29
	1082	JP74_21835	JQGB01000050	2.29
	1083	JP74_04655	JQGB01000006	2.29
	1084	JP74_05780	JQGB01000009	2.29
	1085	JP74_16875	JQGB01000029	2.29
	1086	JP74_17365	JQGB01000033	2.29
	1087	JP74_17525	JQGB01000033	2.29
	1088	JP74_21825	JQGB01000050	2.29
	1089	JP74_23145	JQGB01000081	2.29
	1090	eno	JQGB01000027	2.29
	1091	JP74_18950	JQGB01000036	2.28
	1092	JP74_03940	JQGB01000005	2.28
	1093	sucC	JQGB01000009	2.28
	1094	JP74_03800	JQGB01000004	2.28
	1095	JP74_13730	JQGB01000022	2.28
	1096	JP74_11675	JQGB01000020	2.28
	1097	JP74_02350	JQGB01000002	2.28
	1098	JP74_01045	JQGB01000002	2.28
	1099	JP74_02655	JQGB01000003	2.28
	1100	JP74_19405	JQGB01000036	2.28
	1101	JP74_02270	JQGB01000002	2.28
	1102	JP74_09845	JQGB01000015	2.28
	1103	JP74_13270	JQGB01000022	2.28
	1104	JP74_11580	JQGB01000020	2.28
	1105	JP74_17570	JQGB01000033	2.28
	1106	JP74_18205	JQGB01000034	2.28
	1107	JP74_21340	JQGB01000048	2.28
	1108	JP74_17370	JQGB01000033	2.28
	1109	JP74_05005	JQGB01000009	2.28
	1110	JP74_10290	JQGB01000017	2.28
	1111	JP74_07390	JQGB01000012	2.28
	1112	JP74_16865	JQGB01000029	2.28
	1113	JP74_19685	JQGB01000038	2.28
	1114	JP74_08430	JQGB01000013	2.28
	1115	JP74_07695	JQGB01000012	2.27
	1116	JP74_12125	JQGB01000021	2.27
	1117	JP74_08830	JQGB01000014	2.27
	1118	JP74_13025	JQGB01000021	2.27
	1119	JP74_10620	JQGB01000018	2.27
	1120	JP74_05120	JQGB01000009	2.27
	1121	JP74_12490	JQGB01000021	2.27
	1122	JP74_06075	JQGB01000010	2.27
	1123	JP74_19530	JQGB01000037	2.27
	1124	JP74_18760	JQGB01000035	2.27
	1125	JP74_00060	JQGB01000001	2.27
	1126	JP74_11355	JQGB01000020	2.27
	1127	JP74_12775	JQGB01000021	2.27
	1128	JP74_00120	JQGB01000001	2.27
	1129	JP74_05805	JQGB01000009	2.27
	1130	JP74_15020	JQGB01000025	2.27
	1131	JP74_06720	JQGB01000011	2.27
	1132	JP74_04990	JQGB01000009	2.27
	1133	JP74_12605	JQGB01000021	2.27
	1134	JP74_13665	JQGB01000022	2.27
	1135	JP74_23070	JQGB01000079	2.27
	1136	JP74_13355	JQGB01000022	2.27
	1137	JP74_18855	JQGB01000035	2.27
	1138	JP74_22630	JQGB01000060	2.27
	1139	JP74_11930	JQGB01000020	2.27
	1140	JP74_21800	JQGB01000050	2.27
	1141	JP74_05680	JQGB01000009	2.26
	1142	JP74_22035	JQGB01000052	2.26
	1143	JP74_22265	JQGB01000054	2.26
	1144	JP74_19805	JQGB01000038	2.26
	1145	JP74_04870	JQGB01000008	2.26
	1146	JP74_15585	JQGB01000027	2.26
	1147	JP74_22795	JQGB01000066	2.26
	1148	JP74_17890	JQGB01000034	2.26
	1149	JP74_16515	JQGB01000027	2.26
	1150	JP74_16605	JQGB01000028	2.26
	1151	JP74_04690	JQGB01000007	2.26
	1152	JP74_23220	JQGB01000088	2.26
	1153	JP74_02855	JQGB01000003	2.26
	1154	JP74_08700	JQGB01000014	2.26
	1155	JP74_02295	JQGB01000002	2.26
	1156	JP74_05720	JQGB01000009	2.26
	1157	JP74_17800	JQGB01000034	2.26
	1158	JP74_15140	JQGB01000026	2.26
	1159	JP74_04745	JQGB01000007	2.26
	1160	JP74_20160	JQGB01000041	2.26
	1161	JP74_04180	JQGB01000006	2.25
	1162	JP74_15440	JQGB01000026	2.25
	1163	JP74_07010	JQGB01000012	2.25
	1164	JP74_03130	JQGB01000004	2.25
	1165	JP74_08485	JQGB01000013	2.25
	1166	JP74_10695	JQGB01000018	2.25
	1167	JP74_13330	JQGB01000022	2.25
	1168	JP74_16695	JQGB01000029	2.25
	1169	JP74_16925	JQGB01000029	2.25
	1170	JP74_18240	JQGB01000034	2.25
	1171	JP74_11610	JQGB01000020	2.25
	1172	JP74_18150	JQGB01000034	2.25
	1173	JP74_04365	JQGB01000006	2.25
	1174	JP74_05370	JQGB01000009	2.25
	1175	JP74_20280	JQGB01000042	2.25
	1176	JP74_06830	JQGB01000011	2.25
	1177	JP74_07135	JQGB01000012	2.25
	1178	JP74_15510	JQGB01000026	2.25
	1179	JP74_01030	JQGB01000002	2.25
	1180	JP74_00615	JQGB01000001	2.25
	1181	JP74_15345	JQGB01000026	2.25
	1182	JP74_10260	JQGB01000017	2.24
	1183	JP74_01250	JQGB01000002	2.24
	1184	JP74_12450	JQGB01000021	2.24
	1185	JP74_06395	JQGB01000010	2.24
	1186	JP74_04320	JQGB01000006	2.24
	1187	JP74_01905	JQGB01000002	2.24
	1188	JP74_13285	JQGB01000022	2.24
	1189	JP74_05915	JQGB01000009	2.24
	1190	JP74_07850	JQGB01000012	2.24
	1191	JP74_09445	JQGB01000015	2.24
	1192	JP74_13000	JQGB01000021	2.24
	1193	JP74_17160	JQGB01000030	2.24
	1194	JP74_00140	JQGB01000001	2.24
	1195	JP74_13090	JQGB01000021	2.24
	1196	JP74_09345	JQGB01000015	2.24
	1197	JP74_13275	JQGB01000022	2.24
	1198	JP74_19615	JQGB01000038	2.24
	1199	hppA	JQGB01000037	2.23
	1200	JP74_17310	JQGB01000031	2.23
	1201	JP74_03275	JQGB01000004	2.23
	1202	fliM	JQGB01000002	2.23
	1203	JP74_04735	JQGB01000007	2.23
	1204	JP74_01335	JQGB01000002	2.23
	1205	JP74_01810	JQGB01000002	2.23
	1206	JP74_08655	JQGB01000014	2.23
	1207	JP74_18270	JQGB01000034	2.23
	1208	JP74_22175	JQGB01000052	2.23
	1209	JP74_03350	JQGB01000004	2.23
	1210	JP74_14595	JQGB01000024	2.23
	1211	JP74_20055	JQGB01000040	2.23
	1212	JP74_20380	JQGB01000043	2.23
	1213	JP74_15695	JQGB01000027	2.23
	1214	JP74_18675	JQGB01000035	2.23
	1215	JP74_04615	JQGB01000006	2.23
	1216	JP74_00090	JQGB01000001	2.23
	1217	JP74_00260	JQGB01000001	2.23
	1218	JP74_04840	JQGB01000008	2.23
	1219	JP74_09240	JQGB01000015	2.23
	1220	JP74_10255	JQGB01000017	2.23
	1221	JP74_10725	JQGB01000018	2.23
	1222	JP74_14240	JQGB01000023	2.23
	1223	JP74_17155	JQGB01000030	2.23
	1224	JP74_19750	JQGB01000038	2.23
	1225	JP74_21675	JQGB01000049	2.23
	1226	clpS	JQGB01000035	2.23
	1227	JP74_05010	JQGB01000009	2.23
	1228	JP74_10415	JQGB01000017	2.23
	1229	JP74_11035	JQGB01000019	2.23
	1230	JP74_09665	JQGB01000015	2.23
	1231	JP74_09720	JQGB01000015	2.23
	1232	JP74_19690	JQGB01000038	2.22
	1233	JP74_16635	JQGB01000028	2.22
	1234	JP74_16565	JQGB01000028	2.22
	1235	JP74_12515	JQGB01000021	2.22
	1236	JP74_14975	JQGB01000025	2.22
	1237	JP74_12890	JQGB01000021	2.22
	1238	JP74_03695	JQGB01000004	2.22
	1239	JP74_07460	JQGB01000012	2.22
	1240	JP74_02550	JQGB01000002	2.22
	1241	JP74_15455	JQGB01000026	2.22
	1242	JP74_19070	JQGB01000036	2.22
	1243	JP74_02820	JQGB01000003	2.22
	1244	JP74_10785	JQGB01000018	2.22
	1245	JP74_00775	JQGB01000002	2.22
	1246	JP74_05200	JQGB01000009	2.22
	1247	JP74_04815	JQGB01000007	2.22
	1248	JP74_09830	JQGB01000015	2.22
	1249	JP74_15555	JQGB01000026	2.22
	1250	JP74_17675	JQGB01000034	2.22
	1251	JP74_06695	JQGB01000011	2.22
	1252	JP74_03705	JQGB01000004	2.22
	1253	JP74_02160	JQGB01000002	2.22
	1254	JP74_06515	JQGB01000010	2.21
	1255	JP74_08590	JQGB01000014	2.21
	1256	hrcA	JQGB01000009	2.21
	1257	JP74_15855	JQGB01000027	2.21
	1258	JP74_09695	JQGB01000015	2.21
	1259	JP74_02425	JQGB01000002	2.21
	1260	JP74_18195	JQGB01000034	2.21
	1261	JP74_18175	JQGB01000034	2.21
	1262	JP74_03575	JQGB01000004	2.21
	1263	JP74_08610	JQGB01000014	2.21
	1264	JP74_20965	JQGB01000047	2.21
	1265	JP74_03900	JQGB01000005	2.21
	1266	JP74_04115	JQGB01000006	2.21
	1267	JP74_07640	JQGB01000012	2.21
	1268	JP74_08945	JQGB01000014	2.21
	1269	JP74_09475	JQGB01000015	2.21
	1270	JP74_15830	JQGB01000027	2.21
	1271	JP74_18460	JQGB01000035	2.21
	1272	JP74_19810	JQGB01000038	2.21
	1273	JP74_09035	JQGB01000015	2.21
	1274	JP74_19100	JQGB01000036	2.21
	1275	JP74_17835	JQGB01000034	2.21
	1276	JP74_13415	JQGB01000022	2.21
	1277	JP74_00650	JQGB01000001	2.21
	1278	JP74_18860	JQGB01000035	2.21
	1279	JP74_09025	JQGB01000015	2.21
	1280	JP74_03515	JQGB01000004	2.2
	1281	JP74_18990	JQGB01000036	2.2
	1282	JP74_04280	JQGB01000006	2.2
	1283	JP74_13380	JQGB01000022	2.2
	1284	JP74_08645	JQGB01000014	2.2
	1285	JP74_18360	JQGB01000034	2.2
	1286	JP74_05385	JQGB01000009	2.2
	1287	JP74_05415	JQGB01000009	2.2
	1288	JP74_22340	JQGB01000054	2.2
	1289	JP74_11480	JQGB01000020	2.2
	1290	JP74_12475	JQGB01000021	2.2
	1291	JP74_17975	JQGB01000034	2.2
	1292	JP74_04845	JQGB01000008	2.2
	1293	JP74_08595	JQGB01000014	2.2
	1294	JP74_22250	JQGB01000054	2.2
	1295	JP74_12735	JQGB01000021	2.2
	1296	JP74_05820	JQGB01000009	2.2
	1297	JP74_06345	JQGB01000010	2.2
	1298	ureC	JQGB01000012	2.2
	1299	JP74_12620	JQGB01000021	2.2
	1300	JP74_00290	JQGB01000001	2.2
	1301	JP74_06610	JQGB01000011	2.2
	1302	JP74_00870	JQGB01000002	2.19
	1303	JP74_15750	JQGB01000027	2.19
	1304	JP74_17760	JQGB01000034	2.19
	1305	JP74_17980	JQGB01000034	2.19
	1306	JP74_19480	JQGB01000037	2.19
	1307	JP74_19515	JQGB01000037	2.19
	1308	JP74_07125	JQGB01000012	2.19
	1309	JP74_10815	JQGB01000018	2.19
	1310	JP74_00795	JQGB01000002	2.19
	1311	JP74_08375	JQGB01000013	2.19
	1312	JP74_07415	JQGB01000012	2.19
	1313	JP74_12220	JQGB01000021	2.19
	1314	JP74_12955	JQGB01000021	2.19
	1315	JP74_10120	JQGB01000016	2.19
	1316	JP74_22470	JQGB01000056	2.19
	1317	JP74_15820	JQGB01000027	2.19
	1318	JP74_17330	JQGB01000033	2.19
	1319	JP74_07735	JQGB01000012	2.19
	1320	JP74_02470	JQGB01000002	2.19
	1321	JP74_02930	JQGB01000004	2.19
	1322	JP74_13305	JQGB01000022	2.19
	1323	JP74_06015	JQGB01000010	2.19
	1324	JP74_11995	JQGB01000020	2.19
	1325	JP74_17700	JQGB01000034	2.19
	1326	JP74_18230	JQGB01000034	2.18
	1327	JP74_18905	JQGB01000035	2.18
	1328	JP74_08180	JQGB01000012	2.18
	1329	JP74_11030	JQGB01000019	2.18
	1330	JP74_08150	JQGB01000012	2.18
	1331	JP74_03460	JQGB01000004	2.18
	1332	JP74_21050	JQGB01000047	2.18
	1333	JP74_07030	JQGB01000012	2.18
	1334	JP74_08110	JQGB01000012	2.18
	1335	JP74_18580	JQGB01000035	2.18
	1336	JP74_17860	JQGB01000034	2.18
	1337	JP74_09645	JQGB01000015	2.18
	1338	JP74_21765	JQGB01000050	2.18
	1339	JP74_17815	JQGB01000034	2.18
	1340	JP74_05830	JQGB01000009	2.18
	1341	JP74_15650	JQGB01000027	2.18
	1342	JP74_09860	JQGB01000015	2.18
	1343	JP74_13125	JQGB01000022	2.18
	1344	JP74_17870	JQGB01000034	2.18
	1345	JP74_01370	JQGB01000002	2.18
	1346	JP74_07885	JQGB01000012	2.18
	1347	JP74_10850	JQGB01000018	2.18
	1348	JP74_09775	JQGB01000015	2.17
	1349	JP74_00430	JQGB01000001	2.17
	1350	JP74_16005	JQGB01000027	2.17
	1351	JP74_22645	JQGB01000062	2.17
	1352	JP74_04875	JQGB01000008	2.17
	1353	JP74_07225	JQGB01000012	2.17
	1354	JP74_09565	JQGB01000015	2.17
	1355	JP74_11925	JQGB01000020	2.17
	1356	JP74_13655	JQGB01000022	2.17
	1357	JP74_17405	JQGB01000033	2.17
	1358	JP74_12870	JQGB01000021	2.17
	1359	JP74_09825	JQGB01000015	2.17
	1360	JP74_00895	JQGB01000002	2.17
	1361	JP74_15705	JQGB01000027	2.17
	1362	JP74_10365	JQGB01000017	2.17
	1363	JP74_20325	JQGB01000043	2.17
	1364	JP74_00170	JQGB01000001	2.17
	1365	JP74_04080	JQGB01000006	2.17
	1366	JP74_06210	JQGB01000010	2.17
	1367	JP74_18830	JQGB01000035	2.17
	1368	JP74_09390	JQGB01000015	2.17
	1369	JP74_00740	JQGB01000002	2.17
	1370	JP74_15400	JQGB01000026	2.17
	1371	JP74_10100	JQGB01000016	2.17
	1372	JP74_16580	JQGB01000028	2.17
	1373	JP74_06595	JQGB01000010	2.17
	1374	JP74_14860	JQGB01000025	2.17
	1375	JP74_08870	JQGB01000014	2.17
	1376	JP74_00765	JQGB01000002	2.17
	1377	JP74_23030	JQGB01000075	2.17
	1378	JP74_19855	JQGB01000040	2.17
	1379	JP74_05580	JQGB01000009	2.16
	1380	JP74_08935	JQGB01000014	2.16
	1381	JP74_09770	JQGB01000015	2.16
	1382	JP74_20200	JQGB01000041	2.16
	1383	JP74_17620	JQGB01000033	2.16
	1384	JP74_06915	JQGB01000011	2.16
	1385	JP74_11075	JQGB01000019	2.16
	1386	JP74_04630	JQGB01000006	2.16
	1387	JP74_09745	JQGB01000015	2.16
	1388	JP74_02525	JQGB01000002	2.16
	1389	JP74_12690	JQGB01000021	2.16
	1390	JP74_14985	JQGB01000025	2.16
	1391	cysW	JQGB01000029	2.16
	1392	JP74_22280	JQGB01000054	2.16
	1393	JP74_09260	JQGB01000015	2.16
	1394	JP74_15290	JQGB01000026	2.16
	1395	fumC	JQGB01000036	2.16
	1396	JP74_14105	JQGB01000023	2.16
	1397	JP74_02485	JQGB01000002	2.16
	1398	JP74_05350	JQGB01000009	2.16
	1399	JP74_07690	JQGB01000012	2.15
	1400	JP74_14510	JQGB01000024	2.15
	1401	JP74_02545	JQGB01000002	2.15
	1402	JP74_22665	JQGB01000062	2.15
	1403	JP74_10020	JQGB01000016	2.15
	1404	JP74_19400	JQGB01000036	2.15
	1405	JP74_08445	JQGB01000013	2.15
	1406	JP74_04945	JQGB01000009	2.15
	1407	JP74_10955	JQGB01000018	2.15
	1408	JP74_22935	JQGB01000071	2.15
	1409	JP74_05110	JQGB01000009	2.15
	1410	JP74_10470	JQGB01000018	2.15
	1411	JP74_14425	JQGB01000024	2.15
	1412	JP74_18790	JQGB01000035	2.15
	1413	JP74_11100	JQGB01000019	2.15
	1414	JP74_09485	JQGB01000015	2.15
	1415	JP74_21385	JQGB01000048	2.15
	1416	JP74_02650	JQGB01000003	2.15
	1417	JP74_03870	JQGB01000005	2.15
	1418	JP74_02770	JQGB01000003	2.15
	1419	JP74_08865	JQGB01000014	2.15
	1420	gltA	JQGB01000022	2.15
	1421	JP74_10435	JQGB01000017	2.15
	1422	JP74_12000	JQGB01000020	2.15
	1423	JP74_13375	JQGB01000022	2.15
	1424	JP74_17200	JQGB01000031	2.15
	1425	JP74_09910	JQGB01000015	2.14
	1426	JP74_02080	JQGB01000002	2.14
	1427	JP74_04275	JQGB01000006	2.14
	1428	JP74_19315	JQGB01000036	2.14
	1429	pgk (JQGB01000004 75160..76375)	JQGB01000004	2.14
	1430	JP74_10405	JQGB01000017	2.14
	1431	JP74_06585	JQGB01000010	2.14
	1432	JP74_04540	JQGB01000006	2.14
	1433	JP74_21925	JQGB01000052	2.14
	1434	JP74_21495	JQGB01000049	2.14
	1435	JP74_18185	JQGB01000034	2.14
	1436	JP74_03290	JQGB01000004	2.14
	1437	JP74_02300	JQGB01000002	2.14
	1438	JP74_08440	JQGB01000013	2.14
	1439	JP74_09505	JQGB01000015	2.14
	1440	JP74_09370	JQGB01000015	2.14
	1441	JP74_00435	JQGB01000001	2.14
	1442	JP74_15950	JQGB01000027	2.14
	1443	JP74_04370	JQGB01000006	2.14
	1444	JP74_04550	JQGB01000006	2.14
	1445	JP74_06755	JQGB01000011	2.14
	1446	JP74_13835	JQGB01000022	2.14
	1447	JP74_20900	JQGB01000047	2.14
	1448	JP74_03540	JQGB01000004	2.14
	1449	JP74_03015	JQGB01000004	2.14
	1450	JP74_04145	JQGB01000006	2.14
	1451	JP74_15795	JQGB01000027	2.14
	1452	JP74_22010	JQGB01000052	2.14
	1453	JP74_09620	JQGB01000015	2.14
	1454	JP74_03205	JQGB01000004	2.14
	1455	JP74_06335	JQGB01000010	2.14
	1456	JP74_15420	JQGB01000026	2.14
	1457	JP74_18440	JQGB01000035	2.14
	1458	JP74_18520	JQGB01000035	2.14
	1459	JP74_19140	JQGB01000036	2.14
	1460	JP74_19185	JQGB01000036	2.14
	1461	JP74_08580	JQGB01000014	2.13
	1462	JP74_00810	JQGB01000002	2.13
	1463	JP74_18180	JQGB01000034	2.13
	1464	JP74_09400	JQGB01000015	2.13
	1465	JP74_20825	JQGB01000045	2.13
	1466	JP74_21235	JQGB01000047	2.13
	1467	JP74_21855	JQGB01000050	2.13
	1468	JP74_08000	JQGB01000012	2.13
	1469	JP74_20245	JQGB01000041	2.13
	1470	JP74_01105	JQGB01000002	2.13
	1471	JP74_04410	JQGB01000006	2.13
	1472	JP74_12650	JQGB01000021	2.13
	1473	JP74_18625	JQGB01000035	2.13
	1474	JP74_15410	JQGB01000026	2.13
	1475	JP74_21570	JQGB01000049	2.13
	1476	JP74_09360	JQGB01000015	2.13
	1477	JP74_14520	JQGB01000024	2.13
	1478	JP74_16740	JQGB01000029	2.13
	1479	JP74_00395	JQGB01000001	2.13
	1480	JP74_02115	JQGB01000002	2.13
	1481	JP74_05985	JQGB01000009	2.13
	1482	JP74_12850	JQGB01000021	2.13
	1483	JP74_03735	JQGB01000004	2.13
	1484	JP74_11530	JQGB01000020	2.13
	1485	JP74_03225	JQGB01000004	2.13
	1486	JP74_14570	JQGB01000024	2.13
	1487	JP74_07810	JQGB01000012	2.13
	1488	JP74_15415	JQGB01000026	2.13
	1489	JP74_20370	JQGB01000043	2.13
	1490	JP74_05575	JQGB01000009	2.13
	1491	JP74_08275	JQGB01000013	2.13
	1492	JP74_15525	JQGB01000026	2.13
	1493	JP74_16640	JQGB01000028	2.13
	1494	JP74_05585	JQGB01000009	2.12
	1495	JP74_00135	JQGB01000001	2.12
	1496	JP74_22575	JQGB01000059	2.12
	1497	JP74_04170	JQGB01000006	2.12
	1498	JP74_20220	JQGB01000041	2.12
	1499	JP74_01085	JQGB01000002	2.12
	1500	JP74_15430	JQGB01000026	2.12
	1501	JP74_09900	JQGB01000015	2.12
	1502	JP74_20985	JQGB01000047	2.12
	1503	JP74_06125	JQGB01000010	2.12
	1504	JP74_14020	JQGB01000022	2.12
	1505	JP74_21210	JQGB01000047	2.12
	1506	oppD (JQGB01000026 24352..25342)	JQGB01000026	2.12
	1507	JP74_03605	JQGB01000004	2.12
	1508	JP74_13190	JQGB01000022	2.12
	1509	JP74_16670	JQGB01000029	2.12
	1510	JP74_05075	JQGB01000009	2.12
	1511	JP74_13265	JQGB01000022	2.12
	1512	JP74_19840	JQGB01000040	2.12
	1513	JP74_08200	JQGB01000012	2.12
	1514	JP74_08135	JQGB01000012	2.12
	1515	glyA (JQGB01000021 105788..107069)	JQGB01000021	2.12
	1516	JP74_11790	JQGB01000020	2.12
	1517	JP74_20345	JQGB01000043	2.12
	1518	JP74_15490	JQGB01000026	2.12
	1519	JP74_16935	JQGB01000029	2.12
	1520	JP74_08120	JQGB01000012	2.12
	1521	JP74_16905	JQGB01000029	2.12
	1522	JP74_19695	JQGB01000038	2.12
	1523	JP74_16795	JQGB01000029	2.12
	1524	JP74_14010	JQGB01000022	2.12
	1525	JP74_05165	JQGB01000009	2.12
	1526	JP74_17305	JQGB01000031	2.11
	1527	JP74_00100	JQGB01000001	2.11
	1528	JP74_17920	JQGB01000034	2.11
	1529	JP74_00195	JQGB01000001	2.11
	1530	JP74_20135	JQGB01000041	2.11
	1531	JP74_12010	JQGB01000020	2.11
	1532	JP74_01900	JQGB01000002	2.11
	1533	JP74_18260	JQGB01000034	2.11
	1534	JP74_05380	JQGB01000009	2.11
	1535	JP74_15575	JQGB01000027	2.11
	1536	JP74_09175	JQGB01000015	2.11
	1537	JP74_15390	JQGB01000026	2.11
	1538	JP74_20400	JQGB01000043	2.11
	1539	JP74_00445	JQGB01000001	2.11
	1540	JP74_09380	JQGB01000015	2.11
	1541	JP74_07440	JQGB01000012	2.11
	1542	JP74_11250	JQGB01000020	2.11
	1543	JP74_12375	JQGB01000021	2.11
	1544	JP74_00745	JQGB01000002	2.11
	1545	JP74_13545	JQGB01000022	2.11
	1546	JP74_02280	JQGB01000002	2.11
	1547	JP74_18390	JQGB01000035	2.11
	1548	JP74_07890	JQGB01000012	2.11
	1549	flgI	JQGB01000002	2.11
	1550	JP74_00905	JQGB01000002	2.11
	1551	JP74_04770	JQGB01000007	2.11
	1552	JP74_13520	JQGB01000022	2.11
	1553	JP74_21420	JQGB01000049	2.11
	1554	JP74_16130	JQGB01000027	2.1
	1555	JP74_04985	JQGB01000009	2.1
	1556	JP74_11980	JQGB01000020	2.1
	1557	JP74_14245	JQGB01000023	2.1
	1558	JP74_01825	JQGB01000002	2.1
	1559	JP74_20580	JQGB01000045	2.1
	1560	JP74_06220	JQGB01000010	2.1
	1561	JP74_09820	JQGB01000015	2.1
	1562	JP74_09785	JQGB01000015	2.1
	1563	JP74_13680	JQGB01000022	2.1
	1564	JP74_00800	JQGB01000002	2.1
	1565	JP74_12625	JQGB01000021	2.1
	1566	rbcL	JQGB01000004	2.1
	1567	JP74_22465	JQGB01000056	2.1
	1568	JP74_03080	JQGB01000004	2.1
	1569	JP74_06675	JQGB01000011	2.1
	1570	JP74_08600	JQGB01000014	2.1
	1571	JP74_15310	JQGB01000026	2.1
	1572	JP74_18145	JQGB01000034	2.1
	1573	JP74_04730	JQGB01000007	2.1
	1574	JP74_19330	JQGB01000036	2.1
	1575	JP74_00055	JQGB01000001	2.09
	1576	JP74_05360	JQGB01000009	2.09
	1577	JP74_00220	JQGB01000001	2.09
	1578	JP74_14030	JQGB01000022	2.09
	1579	JP74_22325	JQGB01000054	2.09
	1580	JP74_03965	JQGB01000005	2.09
	1581	JP74_21335	JQGB01000048	2.09
	1582	JP74_06120	JQGB01000010	2.09
	1583	JP74_18960	JQGB01000036	2.09
	1584	JP74_20185	JQGB01000041	2.09
	1585	JP74_06810	JQGB01000011	2.09
	1586	JP74_06860	JQGB01000011	2.09
	1587	fadE	JQGB01000026	2.09
	1588	JP74_16305	JQGB01000027	2.09
	1589	JP74_12935	JQGB01000021	2.09
	1590	JP74_18660	JQGB01000035	2.08
	1591	JP74_06805	JQGB01000011	2.08
	1592	JP74_18920	JQGB01000035	2.08
	1593	JP74_00110	JQGB01000001	2.08
	1594	JP74_00150	JQGB01000001	2.08
	1595	JP74_00215	JQGB01000001	2.08
	1596	JP74_00790	JQGB01000002	2.08
	1597	JP74_01070	JQGB01000002	2.08
	1598	JP74_01780	JQGB01000002	2.08
	1599	JP74_02105	JQGB01000002	2.08
	1600	JP74_02695	JQGB01000003	2.08
	1601	JP74_02700	JQGB01000003	2.08
	1602	JP74_02730	JQGB01000003	2.08
	1603	JP74_02880	JQGB01000003	2.08
	1604	JP74_03435	JQGB01000004	2.08
	1605	JP74_04295	JQGB01000006	2.08
	1606	JP74_05925	JQGB01000009	2.08
	1607	JP74_06785	JQGB01000011	2.08
	1608	JP74_07170	JQGB01000012	2.08
	1609	JP74_07360	JQGB01000012	2.08
	1610	JP74_07400	JQGB01000012	2.08
	1611	JP74_08720	JQGB01000014	2.08
	1612	JP74_08980	JQGB01000015	2.08
	1613	JP74_09060	JQGB01000015	2.08
	1614	JP74_09430	JQGB01000015	2.08
	1615	JP74_10030	JQGB01000016	2.08
	1616	JP74_10110	JQGB01000016	2.08
	1617	JP74_10610	JQGB01000018	2.08
	1618	JP74_10760	JQGB01000018	2.08
	1619	JP74_12015	JQGB01000020	2.08
	1620	JP74_12095	JQGB01000021	2.08
	1621	JP74_12755	JQGB01000021	2.08
	1622	JP74_13115	JQGB01000021	2.08
	1623	JP74_13255	JQGB01000022	2.08
	1624	JP74_13805	JQGB01000022	2.08
	1625	JP74_13850	JQGB01000022	2.08
	1626	JP74_14320	JQGB01000024	2.08
	1627	JP74_14740	JQGB01000025	2.08
	1628	JP74_15840	JQGB01000027	2.08
	1629	JP74_16250	JQGB01000027	2.08
	1630	JP74_16290	JQGB01000027	2.08
	1631	JP74_16855	JQGB01000029	2.08
	1632	JP74_18115	JQGB01000034	2.08
	1633	JP74_18955	JQGB01000036	2.08
	1634	JP74_19105	JQGB01000036	2.08
	1635	JP74_19145	JQGB01000036	2.08
	1636	JP74_19580	JQGB01000038	2.08
	1637	JP74_19870	JQGB01000040	2.08
	1638	JP74_20310	JQGB01000043	2.08
	1639	JP74_21880	JQGB01000050	2.08
	1640	JP74_22315	JQGB01000054	2.08
	1641	JP74_22345	JQGB01000054	2.08
	1642	JP74_22900	JQGB01000068	2.08
	1643	JP74_00760	JQGB01000002	2.08
	1644	JP74_00955	JQGB01000002	2.08
	1645	JP74_01495	JQGB01000002	2.08
	1646	JP74_01985	JQGB01000002	2.08
	1647	JP74_03105	JQGB01000004	2.08
	1648	JP74_03970	JQGB01000005	2.08
	1649	JP74_04155	JQGB01000006	2.08
	1650	JP74_04565	JQGB01000006	2.08
	1651	JP74_04795	JQGB01000007	2.08
	1652	JP74_04960	JQGB01000009	2.08
	1653	JP74_05020	JQGB01000009	2.08
	1654	JP74_06380	JQGB01000010	2.08
	1655	JP74_07015	JQGB01000012	2.08
	1656	JP74_08245	JQGB01000012	2.08
	1657	JP74_08270	JQGB01000013	2.08
	1658	JP74_08815	JQGB01000014	2.08
	1659	JP74_09235	JQGB01000015	2.08
	1660	JP74_09795	JQGB01000015	2.08
	1661	JP74_09915	JQGB01000015	2.08
	1662	JP74_09975	JQGB01000016	2.08
	1663	JP74_10300	JQGB01000017	2.08
	1664	JP74_10495	JQGB01000018	2.08
	1665	JP74_12600	JQGB01000021	2.08
	1666	JP74_12695	JQGB01000021	2.08
	1667	JP74_13820	JQGB01000022	2.08
	1668	JP74_16845	JQGB01000029	2.08
	1669	JP74_16850	JQGB01000029	2.08
	1670	JP74_17320	JQGB01000032	2.08
	1671	JP74_17585	JQGB01000033	2.08
	1672	JP74_17665	JQGB01000034	2.08
	1673	JP74_18120	JQGB01000034	2.08
	1674	JP74_18640	JQGB01000035	2.08
	1675	JP74_21045	JQGB01000047	2.08
	1676	JP74_21425	JQGB01000049	2.08
	1677	JP74_21485	JQGB01000049	2.08
	1678	JP74_21690	JQGB01000049	2.08
	1679	JP74_22820	JQGB01000067	2.08
	1680	JP74_23315	JQGB01000093	2.08
	1681	JP74_18020	JQGB01000034	2.07
	1682	JP74_23090	JQGB01000079	2.07
	1683	JP74_00165	JQGB01000001	2.07
	1684	JP74_11410	JQGB01000020	2.07
	1685	JP74_02200	JQGB01000002	2.07
	1686	JP74_01895	JQGB01000002	2.07
	1687	oppD (JQGB01000001 89499..90486)	JQGB01000001	2.07
	1688	JP74_19395	JQGB01000036	2.07
	1689	JP74_20125	JQGB01000041	2.07
	1690	JP74_06270	JQGB01000010	2.06
	1691	JP74_10780	JQGB01000018	2.06
	1692	JP74_03370	JQGB01000004	2.06
	1693	JP74_07080	JQGB01000012	2.06
	1694	JP74_00915	JQGB01000002	2.06
	1695	JP74_20815	JQGB01000045	2.06
	1696	JP74_17270	JQGB01000031	2.06
	1697	JP74_17810	JQGB01000034	2.06
	1698	JP74_08205	JQGB01000012	2.06
	1699	JP74_21670	JQGB01000049	2.06
	1700	JP74_03365	JQGB01000004	2.06
	1701	JP74_08990	JQGB01000015	2.06
	1702	JP74_13780	JQGB01000022	2.06
	1703	JP74_07265	JQGB01000012	2.06
	1704	JP74_10170	JQGB01000016	2.06
	1705	JP74_00020	JQGB01000001	2.06
	1706	JP74_16735	JQGB01000029	2.06
	1707	JP74_15590	JQGB01000027	2.06
	1708	JP74_14170	JQGB01000023	2.06
	1709	JP74_18465	JQGB01000035	2.06
	1710	JP74_10060	JQGB01000016	2.06
	1711	JP74_03075	JQGB01000004	2.06
	1712	JP74_10280	JQGB01000017	2.06
	1713	JP74_19620	JQGB01000038	2.05
	1714	JP74_12790	JQGB01000021	2.05
	1715	JP74_01790	JQGB01000002	2.05
	1716	JP74_12285	JQGB01000021	2.05
	1717	JP74_22735	JQGB01000062	2.05
	1718	JP74_22185	JQGB01000053	2.05
	1719	JP74_09015	JQGB01000015	2.05
	1720	JP74_10490	JQGB01000018	2.05
	1721	JP74_02590	JQGB01000002	2.05
	1722	JP74_00980	JQGB01000002	2.05
	1723	JP74_11500	JQGB01000020	2.05
	1724	JP74_04210	JQGB01000006	2.05
	1725	JP74_10625	JQGB01000018	2.05
	1726	JP74_01950	JQGB01000002	2.05
	1727	JP74_06890	JQGB01000011	2.05
	1728	JP74_17350	JQGB01000033	2.05
	1729	JP74_11420	JQGB01000020	2.05
	1730	JP74_22475	JQGB01000056	2.05
	1731	JP74_10330	JQGB01000017	2.05
	1732	JP74_18850	JQGB01000035	2.05
	1733	JP74_02715	JQGB01000003	2.05
	1734	JP74_18100	JQGB01000034	2.05
	1735	JP74_03235	JQGB01000004	2.05
	1736	JP74_17225	JQGB01000031	2.05
	1737	JP74_09010	JQGB01000015	2.05
	1738	JP74_01265	JQGB01000002	2.04
	1739	JP74_05460	JQGB01000009	2.04
	1740	JP74_21715	JQGB01000050	2.04
	1741	JP74_13810	JQGB01000022	2.04
	1742	JP74_04965	JQGB01000009	2.04
	1743	JP74_07750	JQGB01000012	2.04
	1744	JP74_05040	JQGB01000009	2.04
	1745	JP74_04460	JQGB01000006	2.04
	1746	JP74_01330	JQGB01000002	2.04
	1747	JP74_05795	JQGB01000009	2.04
	1748	JP74_04125	JQGB01000006	2.04
	1749	JP74_10615	JQGB01000018	2.04
	1750	JP74_16075	JQGB01000027	2.04
	1751	JP74_12845	JQGB01000021	2.04
	1752	JP74_03345	JQGB01000004	2.04
	1753	JP74_15735	JQGB01000027	2.04
	1754	JP74_02945	JQGB01000004	2.04
	1755	JP74_07270	JQGB01000012	2.04
	1756	JP74_17925	JQGB01000034	2.04
	1757	JP74_12910	JQGB01000021	2.04
	1758	JP74_20040	JQGB01000040	2.04
	1759	JP74_16725	JQGB01000029	2.04
	1760	JP74_01505	JQGB01000002	2.04
	1761	JP74_10400	JQGB01000017	2.04
	1762	JP74_04535	JQGB01000006	2.04
	1763	JP74_18305	JQGB01000034	2.04
	1764	JP74_00755	JQGB01000002	2.04
	1765	JP74_01465	JQGB01000002	2.04
	1766	JP74_21780	JQGB01000050	2.04
	1767	JP74_06105	JQGB01000010	2.04
	1768	JP74_13890	JQGB01000022	2.03
	1769	JP74_16540	JQGB01000027	2.03
	1770	JP74_18515	JQGB01000035	2.03
	1771	JP74_08290	JQGB01000013	2.03
	1772	JP74_22760	JQGB01000063	2.03
	1773	JP74_14130	JQGB01000023	2.03
	1774	JP74_19850	JQGB01000040	2.03
	1775	JP74_14585	JQGB01000024	2.03
	1776	JP74_02490	JQGB01000002	2.03
	1777	JP74_10885	JQGB01000018	2.03
	1778	JP74_01500	JQGB01000002	2.03
	1779	JP74_11170	JQGB01000019	2.03
	1780	JP74_16610	JQGB01000028	2.03
	1781	JP74_06590	JQGB01000010	2.03
	1782	JP74_09170	JQGB01000015	2.03
	1783	JP74_17790	JQGB01000034	2.03
	1784	JP74_13495	JQGB01000022	2.03
	1785	JP74_04315	JQGB01000006	2.03
	1786	JP74_10475	JQGB01000018	2.03
	1787	pgk (JQGB01000026 6708..7911)	JQGB01000026	2.03
	1788	JP74_03340	JQGB01000004	2.03
	1789	JP74_08395	JQGB01000013	2.03
	1790	JP74_16065	JQGB01000027	2.03
	1791	JP74_19575	JQGB01000038	2.03
	1792	JP74_11840	JQGB01000020	2.03
	1793	JP74_02475	JQGB01000002	2.03
	1794	JP74_12480	JQGB01000021	2.03
	1795	JP74_07040	JQGB01000012	2.02
	1796	JP74_05225	JQGB01000009	2.02
	1797	JP74_19195	JQGB01000036	2.02
	1798	JP74_07785	JQGB01000012	2.02
	1799	JP74_03405	JQGB01000004	2.02
	1800	JP74_04175	JQGB01000006	2.02
	1801	JP74_02375	JQGB01000002	2.02
	1802	JP74_03980	JQGB01000005	2.02
	1803	JP74_00185	JQGB01000001	2.02
	1804	JP74_03730	JQGB01000004	2.02
	1805	JP74_10205	JQGB01000016	2.02
	1806	JP74_17805	JQGB01000034	2.02
	1807	JP74_18235	JQGB01000034	2.02
	1808	JP74_03560	JQGB01000004	2.02
	1809	JP74_18865	JQGB01000035	2.02
	1810	JP74_02555	JQGB01000002	2.02
	1811	JP74_04465	JQGB01000006	2.02
	1812	JP74_15755	JQGB01000027	2.02
	1813	JP74_16690	JQGB01000029	2.02
	1814	JP74_01005	JQGB01000002	2.02
	1815	JP74_20520	JQGB01000044	2.02
	1816	JP74_09760	JQGB01000015	2.02
	1817	JP74_00410	JQGB01000001	2.02
	1818	JP74_05950	JQGB01000009	2.02
	1819	JP74_22860	JQGB01000067	2.02
	1820	JP74_06035	JQGB01000010	2.02
	1821	JP74_20170	JQGB01000041	2.02
	1822	JP74_11795	JQGB01000020	2.02
	1823	JP74_08555	JQGB01000014	2.02
	1824	JP74_02380	JQGB01000002	2.01
	1825	JP74_03640	JQGB01000004	2.01
	1826	JP74_06540	JQGB01000010	2.01
	1827	JP74_11735	JQGB01000020	2.01
	1828	JP74_14025	JQGB01000022	2.01
	1829	JP74_04995	JQGB01000009	2.01
	1830	JP74_06360	JQGB01000010	2.01
	1831	JP74_14005	JQGB01000022	2.01
	1832	JP74_21190	JQGB01000047	2.01
	1833	JP74_02825	JQGB01000003	2.01
	1834	JP74_04775	JQGB01000007	2.01
	1835	JP74_13490	JQGB01000022	2.01
	1836	JP74_01135	JQGB01000002	2.01
	1837	JP74_14455	JQGB01000024	2.01
	1838	glmU	JQGB01000027	2.01
	1839	JP74_05345	JQGB01000009	2.01
	1840	JP74_07335	JQGB01000012	2.01
	1841	JP74_08005	JQGB01000012	2.01
	1842	JP74_23075	JQGB01000079	2.01
	1843	JP74_18615	JQGB01000035	2.01
	1844	JP74_16080	JQGB01000027	2.01
	1845	JP74_16015	JQGB01000027	2.01
	1846	JP74_20375	JQGB01000043	2.01
	1847	JP74_10275	JQGB01000017	2.01
	1848	JP74_04930	JQGB01000009	2.01
	1849	JP74_12680	JQGB01000021	2.01
	1850	JP74_15895	JQGB01000027	2.01
	1851	JP74_02785	JQGB01000003	2.01
	1852	JP74_03455	JQGB01000004	2.01
	1853	JP74_15905	JQGB01000027	2.01
	1854	JP74_12245	JQGB01000021	2.01
	1855	JP74_08915	JQGB01000014	2.01
	1856	JP74_18680	JQGB01000035	2.01
	1857	JP74_03915	JQGB01000005	2.01
	1858	JP74_00160	JQGB01000001	2
	1859	JP74_01055	JQGB01000002	2
	1860	JP74_13325	JQGB01000022	2
	1861	JP74_15460	JQGB01000026	2
	1862	JP74_15100	JQGB01000026	2
	1863	JP74_00840	JQGB01000002	2
	1864	JP74_15085	JQGB01000026	2
	1865	JP74_14685	JQGB01000025	2
	1866	JP74_02275	JQGB01000002	2
	1867	JP74_02110	JQGB01000002	2
	1868	JP74_12070	JQGB01000020	2
	1869	JP74_19080	JQGB01000036	2
	1870	JP74_03165	JQGB01000004	2
	1871	JP74_14180	JQGB01000023	2
	1872	JP74_12025	JQGB01000020	2
	1873	JP74_17215	JQGB01000031	2
	1874	JP74_22260	JQGB01000054	2
	1875	JP74_01515	JQGB01000002	2
	1876	gabD (JQGB01000033 43894..45349)	JQGB01000033	2
	1877	JP74_12320	JQGB01000021	2
	1878	JP74_23055	JQGB01000077	2
	1879	JP74_04635	JQGB01000006	2
	1880	JP74_13015	JQGB01000021	2
	1881	JP74_11855	JQGB01000020	2
	1882	JP74_09340	JQGB01000015	2
	1883	JP74_08640	JQGB01000014	2
	1884	JP74_15300	JQGB01000026	2
	1885	JP74_08905	JQGB01000014	2
	1886	JP74_20950	JQGB01000047	2
	1887	JP74_06440	JQGB01000010	2
	1888	JP74_12635	JQGB01000021	2
	1889	JP74_10115	JQGB01000016	2
	1890	pepN	JQGB01000047	1.99
	1891	JP74_06635	JQGB01000011	1.99
	1892	JP74_18095	JQGB01000034	1.99
	1893	JP74_08470	JQGB01000013	1.99
	1894	JP74_05605	JQGB01000009	1.99
	1895	JP74_05290	JQGB01000009	1.99
	1896	JP74_06055	JQGB01000010	1.99
	1897	JP74_06780	JQGB01000011	1.99
	1898	JP74_09300	JQGB01000015	1.99
	1899	JP74_15340	JQGB01000026	1.99
	1900	JP74_17745	JQGB01000034	1.99
	1901	JP74_10575	JQGB01000018	1.99
	1902	JP74_04220	JQGB01000006	1.99
	1903	JP74_07595	JQGB01000012	1.99
	1904	JP74_15940	JQGB01000027	1.99
	1905	JP74_01160	JQGB01000002	1.99
	1906	JP74_08220	JQGB01000012	1.99
	1907	JP74_17295	JQGB01000031	1.99
	1908	JP74_08530	JQGB01000014	1.99
	1909	JP74_03335	JQGB01000004	1.99
	1910	JP74_02505	JQGB01000002	1.99
	1911	JP74_10510	JQGB01000018	1.99
	1912	JP74_10065	JQGB01000016	1.99
	1913	JP74_02155	JQGB01000002	1.99
	1914	JP74_11260	JQGB01000020	1.99
	1915	JP74_15425	JQGB01000026	1.99
	1916	JP74_15880	JQGB01000027	1.99
	1917	JP74_17300	JQGB01000031	1.99
	1918	JP74_02215	JQGB01000002	1.98
	1919	JP74_07160	JQGB01000012	1.98
	1920	JP74_16315	JQGB01000027	1.98
	1921	JP74_01990	JQGB01000002	1.98
	1922	JP74_02870	JQGB01000003	1.98
	1923	JP74_10175	JQGB01000016	1.98
	1924	JP74_11380	JQGB01000020	1.98
	1925	JP74_13210	JQGB01000022	1.98
	1926	JP74_14235	JQGB01000023	1.98
	1927	JP74_18475	JQGB01000035	1.98
	1928	JP74_21860	JQGB01000050	1.98
	1929	JP74_22565	JQGB01000059	1.98
	1930	JP74_11760	JQGB01000020	1.98
	1931	JP74_21730	JQGB01000050	1.98
	1932	JP74_15055	JQGB01000025	1.98
	1933	JP74_05085	JQGB01000009	1.98
	1934	JP74_07610	JQGB01000012	1.98
	1935	JP74_11425	JQGB01000020	1.98
	1936	JP74_00935	JQGB01000002	1.98
	1937	JP74_01305	JQGB01000002	1.98
	1938	JP74_11710	JQGB01000020	1.98
	1939	JP74_10075	JQGB01000016	1.98
	1940	JP74_21665	JQGB01000049	1.98
	1941	JP74_09930	JQGB01000016	1.98
	1942	JP74_16115	JQGB01000027	1.98
	1943	JP74_17945	JQGB01000034	1.98
	1944	JP74_21290	JQGB01000048	1.98
	1945	JP74_14930	JQGB01000025	1.98
	1946	JP74_20850	JQGB01000047	1.98
	1947	JP74_08505	JQGB01000014	1.98
	1948	proA	JQGB01000033	1.98
	1949	JP74_13695	JQGB01000022	1.98
	1950	JP74_22200	JQGB01000054	1.98
	1951	JP74_00175	JQGB01000001	1.98
	1952	JP74_03770	JQGB01000004	1.98
	1953	JP74_08535	JQGB01000014	1.98
	1954	JP74_00245	JQGB01000001	1.98
	1955	JP74_02840	JQGB01000003	1.97
	1956	JP74_05675	JQGB01000009	1.97
	1957	JP74_11875	JQGB01000020	1.97
	1958	JP74_23245	JQGB01000090	1.97
	1959	purH	JQGB01000090	1.97
	1960	JP74_00600	JQGB01000001	1.97
	1961	JP74_01150	JQGB01000002	1.97
	1962	JP74_02780	JQGB01000003	1.97
	1963	JP74_16085	JQGB01000027	1.97
	1964	JP74_20190	JQGB01000041	1.97
	1965	JP74_06580	JQGB01000010	1.97
	1966	JP74_21070	JQGB01000047	1.97
	1967	JP74_11880	JQGB01000020	1.97
	1968	JP74_03215	JQGB01000004	1.97
	1969	JP74_05520	JQGB01000009	1.97
	1970	JP74_07925	JQGB01000012	1.97
	1971	JP74_04055	JQGB01000005	1.97
	1972	JP74_03220	JQGB01000004	1.97
	1973	JP74_09605	JQGB01000015	1.97
	1974	JP74_18125	JQGB01000034	1.97
	1975	JP74_06905	JQGB01000011	1.97
	1976	JP74_11090	JQGB01000019	1.97
	1977	JP74_07730	JQGB01000012	1.97
	1978	JP74_15955	JQGB01000027	1.97
	1979	JP74_01050	JQGB01000002	1.97
	1980	JP74_09180	JQGB01000015	1.97
	1981	JP74_13550	JQGB01000022	1.97
	1982	JP74_22845	JQGB01000067	1.97
	1983	JP74_11625	JQGB01000020	1.97
	1984	JP74_17505	JQGB01000033	1.97
	1985	JP74_08625	JQGB01000014	1.97
	1986	JP74_20650	JQGB01000045	1.97
	1987	JP74_04305	JQGB01000006	1.97
	1988	JP74_15860	JQGB01000027	1.97
	1989	JP74_18250	JQGB01000034	1.97
	1990	JP74_22925	JQGB01000070	1.97
	1991	JP74_06835	JQGB01000011	1.97
	1992	JP74_18155	JQGB01000034	1.97
	1993	JP74_08850	JQGB01000014	1.97
	1994	JP74_03855	JQGB01000005	1.97
	1995	JP74_17660	JQGB01000034	1.97
	1996	JP74_14465	JQGB01000024	1.96
	1997	JP74_09265	JQGB01000015	1.96
	1998	JP74_12760	JQGB01000021	1.96
[truncated: 2,014 more rows]

## Sheet: Con. Vs. DON (3h)
	RNA transcripts that have changed due to deoxynivalenol (50 ug/mL) inclusion in Devosia mutans 17-2-E-8 growth media (3 hour).
	#	Transcript	Chromosome	Fold Change
	1	JP74_01440	JQGB01000002	∞
	2	JP74_09070	JQGB01000015	∞
	3	JP74_09365	JQGB01000015	∞
	4	JP74_11900	JQGB01000020	∞
	5	JP74_15035	JQGB01000025	∞
	6	JP74_15975	JQGB01000027	∞
	7	JP74_18215	JQGB01000034	∞
	8	JP74_21090	JQGB01000047	∞
	9	JP74_21350	JQGB01000048	∞
	10	JP74_21985	JQGB01000052	∞
	11	JP74_09595	JQGB01000015	18.64
	12	JP74_19940	JQGB01000040	14.49
	13	JP74_15915	JQGB01000027	7.41
	14	JP74_21880	JQGB01000050	7.25
	15	JP74_21935	JQGB01000052	6.21
	16	JP74_13875	JQGB01000022	6.03
	17	JP74_15595	JQGB01000027	5.69
	18	JP74_16255	JQGB01000027	5.6
	19	JP74_03255	JQGB01000004	5.56
	20	JP74_01245	JQGB01000002	5.52
	21	JP74_16245	JQGB01000027	5.44
	22	JP74_20245	JQGB01000041	5.27
	23	JP74_20250	JQGB01000041	5.18
	24	JP74_11585	JQGB01000020	5.18
	25	JP74_16260	JQGB01000027	5.09
	26	JP74_23295	JQGB01000093	5.07
	27	JP74_11650	JQGB01000020	4.97
	28	JP74_03835	JQGB01000005	4.83
	29	JP74_01200	JQGB01000002	4.83
	30	JP74_16250	JQGB01000027	4.8
	31	JP74_18340	JQGB01000034	4.59
	32	JP74_22385	JQGB01000055	4.49
	33	JP74_05685	JQGB01000009	4.35
	34	JP74_18865	JQGB01000035	4.34
	35	JP74_14990	JQGB01000025	4.24
	36	JP74_02695	JQGB01000003	4.14
	37	JP74_09560	JQGB01000015	4.14
	38	JP74_16660	JQGB01000028	4.14
	39	JP74_03245	JQGB01000004	4.01
	40	JP74_20830	JQGB01000046	3.99
	41	JP74_07920	JQGB01000012	3.87
	42	JP74_02440	JQGB01000002	3.83
	43	JP74_06575	JQGB01000010	3.8
	44	JP74_10055	JQGB01000016	3.8
	45	JP74_16240	JQGB01000027	3.8
	46	JP74_03410	JQGB01000004	3.71
	47	JP74_01995	JQGB01000002	3.62
	48	JP74_03395	JQGB01000004	3.62
	49	JP74_09965	JQGB01000016	3.62
	50	JP74_14225	JQGB01000023	3.58
	51	JP74_05940	JQGB01000009	3.52
	52	JP74_01395	JQGB01000002	3.48
	53	JP74_02975	JQGB01000004	3.48
	54	JP74_20835	JQGB01000046	3.45
	55	JP74_18455	JQGB01000035	3.42
	56	JP74_07645	JQGB01000012	3.38
	57	JP74_08035	JQGB01000012	3.37
	58	JP74_11705	JQGB01000020	3.36
	59	JP74_13885	JQGB01000022	3.34
	60	JP74_16575	JQGB01000028	3.31
	61	JP74_02925	JQGB01000004	3.25
	62	JP74_12615	JQGB01000021	3.25
	63	JP74_22600	JQGB01000060	3.24
	64	JP74_02410	JQGB01000002	3.18
	65	JP74_00815	JQGB01000002	3.17
	66	JP74_05880	JQGB01000009	3.11
	67	JP74_08260	JQGB01000013	3.11
	68	JP74_05215	JQGB01000009	3.11
	69	JP74_10030	JQGB01000016	3.11
	70	JP74_16265	JQGB01000027	3.11
	71	JP74_19600	JQGB01000038	3.11
	72	JP74_21045	JQGB01000047	3.11
	73	JP74_07670	JQGB01000012	3.08
	74	fliM	JQGB01000002	3.05
	75	JP74_03240	JQGB01000004	3.02
	76	JP74_15210	JQGB01000026	3.01
	77	JP74_13775	JQGB01000022	2.99
	78	JP74_02030	JQGB01000002	2.95
	79	JP74_02670	JQGB01000003	2.93
	80	JP74_12045	JQGB01000020	2.93
	81	JP74_20775	JQGB01000045	2.93
	82	JP74_06865	JQGB01000011	2.93
	83	JP74_17750	JQGB01000034	2.92
	84	JP74_02545	JQGB01000002	2.87
	85	JP74_10215	JQGB01000016	2.87
	86	JP74_06380	JQGB01000010	2.85
	87	JP74_18075	JQGB01000034	2.85
	88	JP74_22495	JQGB01000056	2.85
	89	JP74_15220	JQGB01000026	2.84
	90	JP74_06355	JQGB01000010	2.82
	91	JP74_10300	JQGB01000017	2.81
	92	JP74_13590	JQGB01000022	2.79
	93	tdh	JQGB01000005	2.78
	94	JP74_06630	JQGB01000011	2.78
	95	JP74_11015	JQGB01000018	2.76
	96	JP74_16760	JQGB01000029	2.76
	97	JP74_21630	JQGB01000049	2.76
	98	JP74_21300	JQGB01000048	2.72
	99	JP74_16785	JQGB01000029	2.72
	100	JP74_11715	JQGB01000020	2.71
	101	JP74_18600	JQGB01000035	2.69
	102	JP74_16765	JQGB01000029	2.68
	103	JP74_05630	JQGB01000009	2.67
	104	JP74_13140	JQGB01000022	2.67
	105	JP74_05670	JQGB01000009	2.67
	106	JP74_07520	JQGB01000012	2.65
	107	JP74_03065	JQGB01000004	2.64
	108	JP74_07540	JQGB01000012	2.63
	109	JP74_14850	JQGB01000025	2.63
	110	JP74_20240	JQGB01000041	2.63
	111	JP74_21430	JQGB01000049	2.62
	112	JP74_23045	JQGB01000076	2.61
	113	JP74_02270	JQGB01000002	2.6
	114	JP74_01870	JQGB01000002	2.59
	115	JP74_04525	JQGB01000006	2.59
	116	JP74_00725	JQGB01000002	2.59
	117	JP74_04165	JQGB01000006	2.59
	118	JP74_07055	JQGB01000012	2.59
	119	JP74_22335	JQGB01000054	2.59
	120	JP74_22355	JQGB01000054	2.59
	121	JP74_22435	JQGB01000055	2.59
	122	JP74_07740	JQGB01000012	2.59
	123	JP74_13065	JQGB01000021	2.59
	124	JP74_03250	JQGB01000004	2.58
	125	rocD	JQGB01000038	2.58
	126	JP74_14995	JQGB01000025	2.57
	127	JP74_01470	JQGB01000002	2.55
	128	JP74_14915	JQGB01000025	2.54
	129	JP74_11670	JQGB01000020	2.54
	130	JP74_07530	JQGB01000012	2.53
	131	JP74_21030	JQGB01000047	2.53
	132	JP74_00595	JQGB01000001	2.51
	133	JP74_15550	JQGB01000026	2.51
	134	JP74_18965	JQGB01000036	2.51
	135	JP74_13400	JQGB01000022	2.51
	136	JP74_14985	JQGB01000025	2.51
	137	JP74_07545	JQGB01000012	2.51
	138	JP74_10195	JQGB01000016	2.5
	139	JP74_07810	JQGB01000012	2.49
	140	JP74_17340	JQGB01000033	2.48
	141	JP74_12315	JQGB01000021	2.47
	142	JP74_17445	JQGB01000033	2.47
	143	JP74_07370	JQGB01000012	2.46
	144	JP74_02045	JQGB01000002	2.45
	145	JP74_06815	JQGB01000011	2.45
	146	JP74_10160	JQGB01000016	2.45
	147	JP74_12575	JQGB01000021	2.44
	148	JP74_16470	JQGB01000027	2.43
	149	JP74_08810	JQGB01000014	2.43
	150	JP74_20580	JQGB01000045	2.42
	151	JP74_04010	JQGB01000005	2.42
	152	JP74_06070	JQGB01000010	2.42
	153	JP74_10760	JQGB01000018	2.42
	154	JP74_16745	JQGB01000029	2.42
	155	JP74_07910	JQGB01000012	2.42
	156	JP74_14825	JQGB01000025	2.42
	157	JP74_11190	JQGB01000019	2.4
	158	JP74_14715	JQGB01000025	2.39
	159	JP74_15245	JQGB01000026	2.39
	160	JP74_18935	JQGB01000036	2.38
	161	JP74_02330	JQGB01000002	2.38
	162	JP74_08265	JQGB01000013	2.38
	163	JP74_05185	JQGB01000009	2.37
	164	JP74_12230	JQGB01000021	2.37
	165	JP74_16270	JQGB01000027	2.37
	166	JP74_20605	JQGB01000045	2.37
	167	JP74_21375	JQGB01000048	2.37
	168	JP74_20625	JQGB01000045	2.35
	169	JP74_09740	JQGB01000015	2.35
	170	JP74_09875	JQGB01000015	2.35
	171	JP74_07935	JQGB01000012	2.34
	172	JP74_22840	JQGB01000067	2.34
	173	JP74_04385	JQGB01000006	2.33
	174	JP74_10930	JQGB01000018	2.33
	175	JP74_19130	JQGB01000036	2.33
	176	JP74_21080	JQGB01000047	2.33
	177	JP74_21955	JQGB01000052	2.33
	178	JP74_22350	JQGB01000054	2.33
	179	JP74_04970	JQGB01000009	2.33
	180	JP74_08015	JQGB01000012	2.33
	181	JP74_05095	JQGB01000009	2.31
	182	JP74_03235	JQGB01000004	2.31
	183	JP74_07665	JQGB01000012	2.31
	184	JP74_10385	JQGB01000017	2.31
	185	JP74_00075	JQGB01000001	2.3
	186	ispG	JQGB01000036	2.3
	187	JP74_06995	JQGB01000012	2.3
	188	JP74_06870	JQGB01000011	2.29
	189	JP74_08315	JQGB01000013	2.29
	190	JP74_05835	JQGB01000009	2.29
	191	JP74_08180	JQGB01000012	2.29
	192	JP74_05935	JQGB01000009	2.28
	193	JP74_19170	JQGB01000036	2.28
	194	JP74_21520	JQGB01000049	2.28
	195	JP74_12225	JQGB01000021	2.28
	196	JP74_00085	JQGB01000001	2.28
	197	JP74_04505	JQGB01000006	2.28
	198	JP74_08695	JQGB01000014	2.28
	199	JP74_15470	JQGB01000026	2.28
	200	JP74_00760	JQGB01000002	2.28
	201	ureA	JQGB01000012	2.28
	202	oppD (JQGB01000026 24352..25342)	JQGB01000026	2.27
	203	JP74_08910	JQGB01000014	2.27
	204	JP74_22960	JQGB01000072	2.27
	205	JP74_01230	JQGB01000002	2.26
	206	JP74_05975	JQGB01000009	2.26
	207	JP74_22135	JQGB01000052	2.25
	208	JP74_19650	JQGB01000038	2.25
	209	JP74_00590	JQGB01000001	2.25
	210	JP74_02505	JQGB01000002	2.25
	211	JP74_22850	JQGB01000067	2.25
	212	JP74_15845	JQGB01000027	2.24
	213	JP74_21365	JQGB01000048	2.24
	214	JP74_01890	JQGB01000002	2.24
	215	JP74_05205	JQGB01000009	2.24
	216	JP74_09400	JQGB01000015	2.23
	217	JP74_01415	JQGB01000002	2.23
	218	JP74_05075	JQGB01000009	2.23
	219	JP74_05800	JQGB01000009	2.23
	220	JP74_04860	JQGB01000008	2.23
	221	JP74_22875	JQGB01000067	2.23
	222	JP74_05180	JQGB01000009	2.22
	223	JP74_08585	JQGB01000014	2.22
	224	JP74_17605	JQGB01000033	2.22
	225	JP74_21260	JQGB01000048	2.22
	226	JP74_03700	JQGB01000004	2.22
	227	JP74_19700	JQGB01000038	2.21
	228	JP74_20840	JQGB01000046	2.21
	229	JP74_19085	JQGB01000036	2.21
	230	JP74_19390	JQGB01000036	2.21
	231	JP74_17495	JQGB01000033	2.21
	232	JP74_02845	JQGB01000003	2.21
	233	JP74_16235	JQGB01000027	2.21
	234	JP74_10940	JQGB01000018	2.2
	235	JP74_06920	JQGB01000011	2.2
	236	JP74_21270	JQGB01000048	2.2
	237	JP74_04995	JQGB01000009	2.2
	238	JP74_17035	JQGB01000029	2.2
	239	JP74_20595	JQGB01000045	2.19
	240	JP74_02390	JQGB01000002	2.19
	241	JP74_08520	JQGB01000014	2.19
	242	JP74_19055	JQGB01000036	2.19
	243	JP74_02550	JQGB01000002	2.18
	244	JP74_05675	JQGB01000009	2.17
	245	JP74_19520	JQGB01000037	2.17
	246	JP74_05920	JQGB01000009	2.17
	247	JP74_16750	JQGB01000029	2.17
	248	JP74_20720	JQGB01000045	2.17
	249	JP74_14100	JQGB01000023	2.16
	250	JP74_10045	JQGB01000016	2.16
	251	JP74_00345	JQGB01000001	2.15
	252	JP74_12005	JQGB01000020	2.15
	253	JP74_21580	JQGB01000049	2.15
	254	JP74_11660	JQGB01000020	2.15
	255	JP74_05305	JQGB01000009	2.14
	256	JP74_19235	JQGB01000036	2.14
	257	JP74_00365	JQGB01000001	2.14
	258	JP74_01820	JQGB01000002	2.14
	259	JP74_00140	JQGB01000001	2.14
	260	JP74_07830	JQGB01000012	2.14
	261	JP74_06845	JQGB01000011	2.14
	262	JP74_11850	JQGB01000020	2.14
	263	JP74_20130	JQGB01000041	2.13
	264	JP74_01425	JQGB01000002	2.13
	265	JP74_05815	JQGB01000009	2.13
	266	JP74_22720	JQGB01000062	2.13
	267	JP74_22275	JQGB01000054	2.13
	268	JP74_10015	JQGB01000016	2.12
	269	JP74_20350	JQGB01000043	2.12
	270	JP74_22210	JQGB01000054	2.12
	271	JP74_19070	JQGB01000036	2.11
	272	JP74_03500	JQGB01000004	2.11
	273	JP74_07250	JQGB01000012	2.11
	274	JP74_19080	JQGB01000036	2.11
	275	JP74_15145	JQGB01000026	2.11
	276	JP74_05980	JQGB01000009	2.11
	277	JP74_05345	JQGB01000009	2.11
	278	JP74_19135	JQGB01000036	2.11
	279	JP74_01835	JQGB01000002	2.1
	280	JP74_02570	JQGB01000002	2.1
	281	JP74_10170	JQGB01000016	2.1
	282	JP74_08100	JQGB01000012	2.1
	283	JP74_08720	JQGB01000014	2.1
	284	JP74_14305	JQGB01000024	2.1
	285	JP74_15445	JQGB01000026	2.09
	286	gabD (JQGB01000004 165925..167383)	JQGB01000004	2.08
	287	JP74_00260	JQGB01000001	2.07
	288	JP74_01750	JQGB01000002	2.07
	289	JP74_02960	JQGB01000004	2.07
	290	JP74_03130	JQGB01000004	2.07
	291	JP74_04990	JQGB01000009	2.07
	292	JP74_05655	JQGB01000009	2.07
	293	JP74_05730	JQGB01000009	2.07
	294	JP74_05995	JQGB01000009	2.07
	295	JP74_06565	JQGB01000010	2.07
	296	JP74_06670	JQGB01000011	2.07
	297	JP74_07285	JQGB01000012	2.07
	298	JP74_08050	JQGB01000012	2.07
	299	JP74_08215	JQGB01000012	2.07
	300	JP74_08355	JQGB01000013	2.07
	301	JP74_09020	JQGB01000015	2.07
	302	JP74_10645	JQGB01000018	2.07
	303	JP74_11175	JQGB01000019	2.07
	304	JP74_11240	JQGB01000020	2.07
	305	JP74_12685	JQGB01000021	2.07
	306	JP74_14040	JQGB01000022	2.07
	307	JP74_15515	JQGB01000026	2.07
	308	JP74_17320	JQGB01000032	2.07
	309	JP74_17990	JQGB01000034	2.07
	310	JP74_19000	JQGB01000036	2.07
	311	JP74_19495	JQGB01000037	2.07
	312	JP74_21055	JQGB01000047	2.07
	313	JP74_21725	JQGB01000050	2.07
	314	JP74_22900	JQGB01000068	2.07
	315	JP74_23040	JQGB01000076	2.07
	316	JP74_01410	JQGB01000002	2.07
	317	JP74_01475	JQGB01000002	2.07
	318	JP74_01975	JQGB01000002	2.07
	319	JP74_06425	JQGB01000010	2.07
	320	JP74_07140	JQGB01000012	2.07
	321	JP74_07970	JQGB01000012	2.07
	322	JP74_08995	JQGB01000015	2.07
	323	JP74_09735	JQGB01000015	2.07
	324	JP74_10855	JQGB01000018	2.07
	325	JP74_11620	JQGB01000020	2.07
	326	JP74_12020	JQGB01000020	2.07
	327	JP74_12065	JQGB01000020	2.07
	328	JP74_14325	JQGB01000024	2.07
	329	JP74_15060	JQGB01000025	2.07
	330	JP74_15075	JQGB01000025	2.07
	331	JP74_16995	JQGB01000029	2.07
	332	JP74_17550	JQGB01000033	2.07
	333	JP74_17785	JQGB01000034	2.07
	334	JP74_18830	JQGB01000035	2.07
	335	JP74_19045	JQGB01000036	2.07
	336	JP74_19545	JQGB01000037	2.07
	337	JP74_21125	JQGB01000047	2.07
	338	JP74_01885	JQGB01000002	2.06
	339	JP74_17940	JQGB01000034	2.06
	340	JP74_06190	JQGB01000010	2.05
	341	JP74_12245	JQGB01000021	2.05
	342	JP74_19355	JQGB01000036	2.05
	343	JP74_21620	JQGB01000049	2.05
	344	JP74_03695	JQGB01000004	2.05
	345	JP74_20670	JQGB01000045	2.05
	346	JP74_02140	JQGB01000002	2.05
	347	JP74_18345	JQGB01000034	2.05
	348	JP74_05290	JQGB01000009	2.04
	349	JP74_21130	JQGB01000047	2.04
	350	JP74_11385	JQGB01000020	2.04
	351	JP74_14770	JQGB01000025	2.04
	352	JP74_12310	JQGB01000021	2.04
	353	JP74_20795	JQGB01000045	2.04
	354	JP74_20925	JQGB01000047	2.04
	355	JP74_06395	JQGB01000010	2.04
	356	JP74_13820	JQGB01000022	2.04
	357	JP74_13510	JQGB01000022	2.04
	358	JP74_04380	JQGB01000006	2.03
	359	JP74_15065	JQGB01000025	2.03
	360	JP74_09855	JQGB01000015	2.03
	361	JP74_14700	JQGB01000025	2.03
	362	JP74_08830	JQGB01000014	2.03
	363	JP74_12010	JQGB01000020	2.03
	364	JP74_02450	JQGB01000002	2.03
	365	JP74_05100	JQGB01000009	2.03
	366	JP74_20970	JQGB01000047	2.03
	367	JP74_16100	JQGB01000027	2.03
	368	JP74_05640	JQGB01000009	2.03
	369	JP74_15175	JQGB01000026	2.02
	370	JP74_03685	JQGB01000004	2.02
	371	JP74_06740	JQGB01000011	2.02
	372	JP74_13030	JQGB01000021	2.02
	373	JP74_10165	JQGB01000016	2.02
	374	JP74_00650	JQGB01000001	2.02
	375	JP74_09360	JQGB01000015	2.02
	376	JP74_17595	JQGB01000033	2.02
	377	JP74_02285	JQGB01000002	2.02
	378	JP74_05070	JQGB01000009	2.02
	379	JP74_08950	JQGB01000014	2.02
	380	JP74_00810	JQGB01000002	2.02
	381	JP74_06235	JQGB01000010	2.01
	382	JP74_18690	JQGB01000035	2.01
	383	JP74_19710	JQGB01000038	2.01
	384	JP74_20675	JQGB01000045	2.01
	385	JP74_06295	JQGB01000010	2.01
	386	JP74_08820	JQGB01000014	2.01
	387	JP74_08945	JQGB01000014	2.01
	388	JP74_22345	JQGB01000054	2.01
	389	JP74_11885	JQGB01000020	2
	390	JP74_16540	JQGB01000027	2
	391	JP74_20310	JQGB01000043	2
	392	JP74_16430	JQGB01000027	2
	393	JP74_06505	JQGB01000010	2
	394	JP74_08400	JQGB01000013	2
	395	phnK (JQGB01000012 10518..11295)	JQGB01000012	2
	396	JP74_14190	JQGB01000023	2
	397	JP74_20685	JQGB01000045	2
	398	JP74_22155	JQGB01000052	2
	399	JP74_08405	JQGB01000013	2
	400	JP74_18940	JQGB01000036	2
	401	JP74_20065	JQGB01000040	2
	402	JP74_19490	JQGB01000037	1.99
	403	JP74_22535	JQGB01000057	1.99
	404	JP74_21875	JQGB01000050	1.99
	405	JP74_06095	JQGB01000010	1.99
	406	JP74_07155	JQGB01000012	1.99
	407	JP74_16465	JQGB01000027	1.99
	408	JP74_10105	JQGB01000016	1.99
	409	JP74_12385	JQGB01000021	1.99
	410	JP74_16460	JQGB01000027	1.99
	411	JP74_14360	JQGB01000024	1.99
	412	JP74_18775	JQGB01000035	1.98
	413	JP74_05635	JQGB01000009	1.98
	414	JP74_21575	JQGB01000049	1.98
	415	JP74_20455	JQGB01000043	1.98
	416	JP74_06910	JQGB01000011	1.98
	417	JP74_00795	JQGB01000002	1.98
	418	JP74_06745	JQGB01000011	1.98
	419	JP74_16790	JQGB01000029	1.98
	420	JP74_05030	JQGB01000009	1.98
	421	JP74_07265	JQGB01000012	1.98
	422	JP74_10945	JQGB01000018	1.98
	423	JP74_21860	JQGB01000050	1.98
	424	JP74_05405	JQGB01000009	1.97
	425	JP74_08300	JQGB01000013	1.97
	426	JP74_03680	JQGB01000004	1.97
	427	JP74_12305	JQGB01000021	1.97
	428	JP74_12350	JQGB01000021	1.97
	429	JP74_19350	JQGB01000036	1.97
	430	JP74_10355	JQGB01000017	1.97
	431	JP74_03675	JQGB01000004	1.97
	432	JP74_21345	JQGB01000048	1.97
	433	JP74_11450	JQGB01000020	1.97
	434	JP74_22480	JQGB01000056	1.97
	435	JP74_23135	JQGB01000081	1.97
	436	JP74_01270	JQGB01000002	1.96
	437	JP74_08925	JQGB01000014	1.96
	438	JP74_20660	JQGB01000045	1.96
	439	JP74_10070	JQGB01000016	1.96
	440	JP74_17110	JQGB01000030	1.96
	441	JP74_22660	JQGB01000062	1.96
	442	JP74_04905	JQGB01000008	1.96
	443	JP74_21675	JQGB01000049	1.96
	444	JP74_08305	JQGB01000013	1.96
	445	JP74_17835	JQGB01000034	1.96
	446	JP74_04175	JQGB01000006	1.96
	447	JP74_21610	JQGB01000049	1.96
	448	JP74_00695	JQGB01000001	1.96
	449	JP74_15930	JQGB01000027	1.96
	450	JP74_04620	JQGB01000006	1.96
	451	JP74_09850	JQGB01000015	1.96
	452	JP74_23025	JQGB01000074	1.96
	453	JP74_06280	JQGB01000010	1.95
	454	JP74_17580	JQGB01000033	1.95
	455	JP74_00805	JQGB01000002	1.95
	456	JP74_20375	JQGB01000043	1.95
	457	JP74_07875	JQGB01000012	1.95
	458	JP74_02300	JQGB01000002	1.95
	459	JP74_05385	JQGB01000009	1.95
	460	JP74_21255	JQGB01000048	1.95
	461	JP74_04215	JQGB01000006	1.94
	462	JP74_02560	JQGB01000002	1.94
	463	JP74_09150	JQGB01000015	1.94
	464	JP74_15020	JQGB01000025	1.94
	465	JP74_12195	JQGB01000021	1.94
	466	JP74_13105	JQGB01000021	1.94
	467	JP74_08340	JQGB01000013	1.94
	468	JP74_18980	JQGB01000036	1.94
	469	JP74_07255	JQGB01000012	1.94
	470	JP74_12015	JQGB01000020	1.94
	471	JP74_12665	JQGB01000021	1.93
	472	JP74_18755	JQGB01000035	1.93
	473	JP74_16090	JQGB01000027	1.93
	474	JP74_16710	JQGB01000029	1.93
	475	JP74_01860	JQGB01000002	1.93
	476	JP74_12640	JQGB01000021	1.93
	477	JP74_02115	JQGB01000002	1.92
	478	JP74_02540	JQGB01000002	1.92
	479	JP74_05840	JQGB01000009	1.92
	480	JP74_14705	JQGB01000025	1.92
	481	JP74_12285	JQGB01000021	1.92
	482	JP74_18860	JQGB01000035	1.92
	483	JP74_04870	JQGB01000008	1.92
	484	JP74_03590	JQGB01000004	1.92
	485	JP74_12485	JQGB01000021	1.92
	486	JP74_17980	JQGB01000034	1.92
	487	JP74_13095	JQGB01000021	1.92
	488	JP74_17840	JQGB01000034	1.92
	489	JP74_20155	JQGB01000041	1.92
	490	JP74_12570	JQGB01000021	1.92
	491	JP74_19345	JQGB01000036	1.91
	492	JP74_02835	JQGB01000003	1.91
	493	JP74_07270	JQGB01000012	1.91
	494	JP74_06040	JQGB01000010	1.91
	495	JP74_16425	JQGB01000027	1.91
	496	JP74_16475	JQGB01000027	1.91
	497	JP74_05285	JQGB01000009	1.91
	498	JP74_00800	JQGB01000002	1.9
	499	JP74_05515	JQGB01000009	1.9
	500	JP74_16915	JQGB01000029	1.9
	501	JP74_17515	JQGB01000033	1.9
	502	JP74_20055	JQGB01000040	1.9
	503	JP74_11460	JQGB01000020	1.9
	504	JP74_12580	JQGB01000021	1.9
	505	JP74_01495	JQGB01000002	1.9
	506	JP74_11195	JQGB01000019	1.9
	507	JP74_00870	JQGB01000002	1.9
	508	JP74_08825	JQGB01000014	1.9
	509	JP74_05455	JQGB01000009	1.9
	510	JP74_08370	JQGB01000013	1.9
	511	JP74_10205	JQGB01000016	1.9
	512	JP74_14575	JQGB01000024	1.9
	513	JP74_08780	JQGB01000014	1.9
	514	JP74_19075	JQGB01000036	1.9
	515	JP74_15300	JQGB01000026	1.9
	516	JP74_08765	JQGB01000014	1.9
	517	JP74_08900	JQGB01000014	1.89
	518	JP74_08330	JQGB01000013	1.89
	519	JP74_06690	JQGB01000011	1.89
	520	JP74_18090	JQGB01000034	1.89
	521	JP74_06990	JQGB01000012	1.89
	522	JP74_13025	JQGB01000021	1.89
	523	JP74_05810	JQGB01000009	1.89
	524	JP74_22470	JQGB01000056	1.89
	525	JP74_19705	JQGB01000038	1.89
	526	JP74_10955	JQGB01000018	1.89
	527	JP74_04900	JQGB01000008	1.89
	528	JP74_04100	JQGB01000006	1.89
	529	JP74_09275	JQGB01000015	1.89
	530	JP74_14120	JQGB01000023	1.89
	531	JP74_18250	JQGB01000034	1.89
	532	JP74_09205	JQGB01000015	1.89
	533	JP74_07595	JQGB01000012	1.89
	534	JP74_11285	JQGB01000020	1.88
	535	JP74_19870	JQGB01000040	1.88
	536	JP74_16775	JQGB01000029	1.88
	537	JP74_18855	JQGB01000035	1.88
	538	JP74_19730	JQGB01000038	1.88
	539	JP74_06790	JQGB01000011	1.88
	540	JP74_07585	JQGB01000012	1.88
	541	JP74_22040	JQGB01000052	1.88
	542	JP74_22980	JQGB01000072	1.88
	543	JP74_06120	JQGB01000010	1.88
	544	JP74_17845	JQGB01000034	1.88
	545	JP74_05555	JQGB01000009	1.88
	546	JP74_14890	JQGB01000025	1.88
	547	JP74_11790	JQGB01000020	1.88
	548	JP74_13835	JQGB01000022	1.88
	549	JP74_09765	JQGB01000015	1.88
	550	JP74_15255	JQGB01000026	1.88
	551	JP74_19100	JQGB01000036	1.88
	552	JP74_19945	JQGB01000040	1.88
	553	JP74_14550	JQGB01000024	1.87
	554	JP74_07165	JQGB01000012	1.87
	555	JP74_15155	JQGB01000026	1.87
	556	JP74_05985	JQGB01000009	1.87
	557	JP74_17155	JQGB01000030	1.87
	558	JP74_05540	JQGB01000009	1.87
	559	JP74_15890	JQGB01000027	1.87
	560	JP74_21845	JQGB01000050	1.87
	561	JP74_19785	JQGB01000038	1.87
	562	JP74_22745	JQGB01000062	1.87
	563	JP74_19240	JQGB01000036	1.87
	564	JP74_22160	JQGB01000052	1.87
	565	JP74_06060	JQGB01000010	1.87
	566	JP74_01480	JQGB01000002	1.87
	567	JP74_10615	JQGB01000018	1.87
	568	JP74_05360	JQGB01000009	1.87
	569	JP74_09830	JQGB01000015	1.86
	570	JP74_08685	JQGB01000014	1.86
	571	JP74_09460	JQGB01000015	1.86
	572	JP74_12590	JQGB01000021	1.86
	573	JP74_00310	JQGB01000001	1.86
	574	JP74_06075	JQGB01000010	1.86
	575	JP74_06465	JQGB01000010	1.86
	576	JP74_16085	JQGB01000027	1.86
	577	JP74_19625	JQGB01000038	1.86
	578	JP74_20790	JQGB01000045	1.86
	579	JP74_21070	JQGB01000047	1.86
	580	JP74_07515	JQGB01000012	1.86
	581	JP74_13935	JQGB01000022	1.86
	582	JP74_21105	JQGB01000047	1.86
	583	JP74_00985	JQGB01000002	1.86
	584	JP74_17855	JQGB01000034	1.86
	585	JP74_10975	JQGB01000018	1.86
	586	JP74_20290	JQGB01000042	1.85
	587	JP74_20565	JQGB01000045	1.85
	588	JP74_22405	JQGB01000055	1.85
	589	eno	JQGB01000027	1.85
	590	JP74_08635	JQGB01000014	1.85
	591	JP74_09030	JQGB01000015	1.85
	592	JP74_17570	JQGB01000033	1.85
	593	JP74_22170	JQGB01000052	1.85
	594	JP74_08290	JQGB01000013	1.85
	595	JP74_21425	JQGB01000049	1.85
	596	JP74_00950	JQGB01000002	1.85
	597	JP74_05595	JQGB01000009	1.85
	598	JP74_10425	JQGB01000017	1.85
	599	JP74_17375	JQGB01000033	1.85
	600	JP74_13055	JQGB01000021	1.85
	601	JP74_05005	JQGB01000009	1.85
	602	JP74_05535	JQGB01000009	1.85
	603	JP74_08020	JQGB01000012	1.85
	604	JP74_10735	JQGB01000018	1.85
	605	JP74_14855	JQGB01000025	1.85
	606	JP74_18140	JQGB01000034	1.85
	607	JP74_02475	JQGB01000002	1.85
	608	JP74_18995	JQGB01000036	1.85
	609	JP74_00740	JQGB01000002	1.85
	610	JP74_04310	JQGB01000006	1.84
	611	JP74_04555	JQGB01000006	1.84
	612	JP74_08250	JQGB01000012	1.84
	613	JP74_01070	JQGB01000002	1.84
	614	JP74_10415	JQGB01000017	1.84
	615	JP74_14280	JQGB01000023	1.84
	616	JP74_20710	JQGB01000045	1.84
	617	JP74_09880	JQGB01000015	1.84
	618	JP74_21510	JQGB01000049	1.84
	619	JP74_11680	JQGB01000020	1.84
	620	JP74_11490	JQGB01000020	1.84
	621	JP74_11535	JQGB01000020	1.84
	622	JP74_07615	JQGB01000012	1.84
	623	JP74_17400	JQGB01000033	1.84
	624	JP74_23305	JQGB01000093	1.84
	625	JP74_01275	JQGB01000002	1.83
	626	JP74_02555	JQGB01000002	1.83
	627	JP74_02470	JQGB01000002	1.83
	628	JP74_22605	JQGB01000060	1.83
	629	JP74_22595	JQGB01000060	1.83
	630	JP74_11945	JQGB01000020	1.83
	631	JP74_22940	JQGB01000072	1.83
	632	JP74_19765	JQGB01000038	1.83
	633	JP74_01875	JQGB01000002	1.83
	634	JP74_12390	JQGB01000021	1.83
	635	JP74_10665	JQGB01000018	1.83
	636	JP74_13125	JQGB01000022	1.83
	637	JP74_06585	JQGB01000010	1.83
	638	glyA (JQGB01000022 96553..97855)	JQGB01000022	1.83
	639	JP74_05925	JQGB01000009	1.83
	640	JP74_03390	JQGB01000004	1.83
	641	JP74_04020	JQGB01000005	1.83
	642	JP74_08245	JQGB01000012	1.83
	643	JP74_15465	JQGB01000026	1.83
	644	JP74_21000	JQGB01000047	1.83
	645	JP74_22020	JQGB01000052	1.83
	646	JP74_22370	JQGB01000055	1.83
	647	JP74_22830	JQGB01000067	1.83
	648	JP74_16740	JQGB01000029	1.82
	649	hrcA	JQGB01000009	1.82
	650	JP74_14115	JQGB01000023	1.82
	651	JP74_11055	JQGB01000019	1.82
	652	JP74_18235	JQGB01000034	1.82
	653	JP74_22190	JQGB01000053	1.82
	654	JP74_12475	JQGB01000021	1.82
	655	JP74_12480	JQGB01000021	1.82
	656	JP74_07025	JQGB01000012	1.82
	657	JP74_19310	JQGB01000036	1.82
	658	JP74_22075	JQGB01000052	1.82
	659	JP74_20020	JQGB01000040	1.82
	660	JP74_00640	JQGB01000001	1.82
	661	JP74_18465	JQGB01000035	1.81
	662	JP74_08450	JQGB01000013	1.81
	663	JP74_00580	JQGB01000001	1.81
	664	trpA	JQGB01000021	1.81
	665	JP74_00690	JQGB01000001	1.81
	666	JP74_01760	JQGB01000002	1.81
	667	JP74_02740	JQGB01000003	1.81
	668	JP74_05350	JQGB01000009	1.81
	669	JP74_05370	JQGB01000009	1.81
	670	JP74_05380	JQGB01000009	1.81
	671	JP74_09795	JQGB01000015	1.81
	672	JP74_14710	JQGB01000025	1.81
	673	JP74_14880	JQGB01000025	1.81
	674	JP74_18300	JQGB01000034	1.81
	675	JP74_19180	JQGB01000036	1.81
	676	ureB	JQGB01000012	1.81
	677	JP74_02970	JQGB01000004	1.81
	678	JP74_10605	JQGB01000018	1.81
	679	JP74_17360	JQGB01000033	1.81
	680	JP74_22790	JQGB01000065	1.81
	681	JP74_04985	JQGB01000009	1.81
	682	JP74_09305	JQGB01000015	1.81
	683	JP74_12990	JQGB01000021	1.81
	684	JP74_10290	JQGB01000017	1.81
	685	JP74_02620	JQGB01000002	1.81
	686	JP74_05145	JQGB01000009	1.81
	687	JP74_06335	JQGB01000010	1.81
	688	JP74_15455	JQGB01000026	1.81
	689	JP74_16595	JQGB01000028	1.81
	690	JP74_23255	JQGB01000091	1.81
	691	JP74_14445	JQGB01000024	1.81
	692	JP74_05460	JQGB01000009	1.81
	693	JP74_19105	JQGB01000036	1.81
	694	JP74_04740	JQGB01000007	1.81
	695	JP74_02395	JQGB01000002	1.81
	696	JP74_20935	JQGB01000047	1.81
	697	JP74_21615	JQGB01000049	1.81
	698	JP74_00395	JQGB01000001	1.8
	699	JP74_19375	JQGB01000036	1.8
	700	JP74_09295	JQGB01000015	1.8
	701	JP74_05795	JQGB01000009	1.8
	702	JP74_09620	JQGB01000015	1.8
	703	JP74_14530	JQGB01000024	1.8
	704	JP74_04975	JQGB01000009	1.8
	705	JP74_21035	JQGB01000047	1.8
	706	JP74_18105	JQGB01000034	1.8
	707	JP74_11355	JQGB01000020	1.8
	708	JP74_05190	JQGB01000009	1.8
	709	JP74_16770	JQGB01000029	1.8
	710	JP74_16115	JQGB01000027	1.8
	711	JP74_12255	JQGB01000021	1.8
	712	JP74_06185	JQGB01000010	1.8
	713	JP74_08710	JQGB01000014	1.8
	714	JP74_12670	JQGB01000021	1.8
	715	JP74_20630	JQGB01000045	1.8
	716	JP74_20825	JQGB01000045	1.8
	717	JP74_07940	JQGB01000012	1.8
	718	JP74_10210	JQGB01000016	1.8
	719	JP74_06285	JQGB01000010	1.8
	720	JP74_16945	JQGB01000029	1.8
	721	JP74_00295	JQGB01000001	1.8
	722	JP74_19500	JQGB01000037	1.8
	723	JP74_05240	JQGB01000009	1.8
	724	JP74_07425	JQGB01000012	1.8
	725	JP74_17540	JQGB01000033	1.8
	726	JP74_17200	JQGB01000031	1.8
	727	JP74_04815	JQGB01000007	1.79
	728	JP74_09325	JQGB01000015	1.79
	729	JP74_01720	JQGB01000002	1.79
	730	JP74_04840	JQGB01000008	1.79
	731	JP74_05200	JQGB01000009	1.79
	732	JP74_17100	JQGB01000030	1.79
	733	JP74_06550	JQGB01000010	1.79
	734	JP74_07235	JQGB01000012	1.79
	735	JP74_19610	JQGB01000038	1.79
	736	JP74_18605	JQGB01000035	1.79
	737	JP74_22625	JQGB01000060	1.79
	738	JP74_07230	JQGB01000012	1.79
	739	JP74_06730	JQGB01000011	1.79
	740	JP74_12605	JQGB01000021	1.79
	741	JP74_20140	JQGB01000041	1.79
	742	JP74_09270	JQGB01000015	1.79
	743	JP74_09505	JQGB01000015	1.79
	744	JP74_05785	JQGB01000009	1.79
	745	JP74_07750	JQGB01000012	1.78
	746	JP74_17950	JQGB01000034	1.78
	747	JP74_09715	JQGB01000015	1.78
	748	JP74_19395	JQGB01000036	1.78
	749	JP74_18115	JQGB01000034	1.78
	750	JP74_20420	JQGB01000043	1.78
	751	JP74_15440	JQGB01000026	1.78
	752	JP74_09090	JQGB01000015	1.78
	753	JP74_12080	JQGB01000021	1.78
	754	JP74_15430	JQGB01000026	1.78
	755	JP74_16885	JQGB01000029	1.78
	756	JP74_10125	JQGB01000016	1.78
	757	JP74_13615	JQGB01000022	1.78
	758	JP74_19630	JQGB01000038	1.78
	759	JP74_00480	JQGB01000001	1.78
	760	JP74_17335	JQGB01000033	1.78
	761	JP74_00880	JQGB01000002	1.78
	762	JP74_03375	JQGB01000004	1.78
	763	JP74_01045	JQGB01000002	1.78
	764	JP74_15585	JQGB01000027	1.78
	765	JP74_04550	JQGB01000006	1.77
	766	JP74_05830	JQGB01000009	1.77
	767	JP74_12325	JQGB01000021	1.77
	768	JP74_14515	JQGB01000024	1.77
	769	JP74_15110	JQGB01000026	1.77
	770	JP74_15840	JQGB01000027	1.77
	771	JP74_18260	JQGB01000034	1.77
	772	JP74_22835	JQGB01000067	1.77
	773	JP74_05010	JQGB01000009	1.77
	774	JP74_06925	JQGB01000011	1.77
	775	JP74_09710	JQGB01000015	1.77
	776	JP74_09930	JQGB01000016	1.77
	777	JP74_21920	JQGB01000052	1.77
	778	JP74_11210	JQGB01000019	1.77
	779	JP74_15040	JQGB01000025	1.77
	780	JP74_20395	JQGB01000043	1.77
	781	JP74_15005	JQGB01000025	1.77
	782	JP74_17180	JQGB01000030	1.77
	783	JP74_10320	JQGB01000017	1.77
	784	JP74_10460	JQGB01000018	1.77
	785	JP74_16380	JQGB01000027	1.77
	786	JP74_16550	JQGB01000027	1.77
	787	JP74_19595	JQGB01000038	1.77
	788	JP74_06700	JQGB01000011	1.77
	789	JP74_16935	JQGB01000029	1.77
	790	JP74_03735	JQGB01000004	1.77
	791	JP74_05610	JQGB01000009	1.77
	792	JP74_07895	JQGB01000012	1.77
	793	JP74_17610	JQGB01000033	1.77
	794	JP74_20175	JQGB01000041	1.77
	795	JP74_06300	JQGB01000010	1.77
	796	JP74_15265	JQGB01000026	1.77
	797	JP74_11980	JQGB01000020	1.77
	798	JP74_17800	JQGB01000034	1.77
	799	JP74_05490	JQGB01000009	1.77
	800	JP74_00285	JQGB01000001	1.77
	801	JP74_02770	JQGB01000003	1.77
	802	JP74_17410	JQGB01000033	1.76
	803	JP74_03275	JQGB01000004	1.76
	804	JP74_19415	JQGB01000036	1.76
	805	JP74_08650	JQGB01000014	1.76
	806	JP74_06830	JQGB01000011	1.76
	807	JP74_01325	JQGB01000002	1.76
	808	JP74_22845	JQGB01000067	1.76
	809	JP74_15580	JQGB01000027	1.76
	810	JP74_03950	JQGB01000005	1.76
	811	JP74_05120	JQGB01000009	1.76
	812	JP74_06165	JQGB01000010	1.76
	813	JP74_07325	JQGB01000012	1.76
	814	JP74_07335	JQGB01000012	1.76
	815	JP74_18795	JQGB01000035	1.76
	816	JP74_23245	JQGB01000090	1.76
	817	JP74_10080	JQGB01000016	1.76
	818	JP74_15345	JQGB01000026	1.76
	819	JP74_17255	JQGB01000031	1.76
	820	JP74_18135	JQGB01000034	1.76
	821	JP74_16480	JQGB01000027	1.76
	822	JP74_00435	JQGB01000001	1.76
	823	JP74_06660	JQGB01000011	1.76
	824	JP74_06770	JQGB01000011	1.76
	825	JP74_05600	JQGB01000009	1.76
	826	JP74_16925	JQGB01000029	1.76
	827	JP74_10130	JQGB01000016	1.76
	828	JP74_19200	JQGB01000036	1.76
	829	JP74_00775	JQGB01000002	1.75
	830	JP74_08310	JQGB01000013	1.75
	831	JP74_15200	JQGB01000026	1.75
	832	JP74_05400	JQGB01000009	1.75
	833	JP74_15135	JQGB01000026	1.75
	834	JP74_17640	JQGB01000034	1.75
	835	JP74_03570	JQGB01000004	1.75
	836	JP74_08010	JQGB01000012	1.75
	837	JP74_10150	JQGB01000016	1.75
	838	JP74_15350	JQGB01000026	1.75
	839	JP74_19430	JQGB01000036	1.75
	840	JP74_19915	JQGB01000040	1.75
	841	JP74_22500	JQGB01000056	1.75
	842	JP74_05560	JQGB01000009	1.75
	843	JP74_09280	JQGB01000015	1.75
	844	JP74_17915	JQGB01000034	1.75
	845	JP74_02385	JQGB01000002	1.75
	846	JP74_12125	JQGB01000021	1.75
	847	JP74_22315	JQGB01000054	1.75
	848	JP74_14475	JQGB01000024	1.75
	849	JP74_19460	JQGB01000037	1.74
	850	JP74_07220	JQGB01000012	1.74
	851	JP74_05165	JQGB01000009	1.74
	852	JP74_01900	JQGB01000002	1.74
	853	JP74_14540	JQGB01000024	1.74
	854	JP74_19755	JQGB01000038	1.74
	855	JP74_05680	JQGB01000009	1.74
	856	JP74_21805	JQGB01000050	1.74
	857	JP74_09775	JQGB01000015	1.74
	858	JP74_16580	JQGB01000028	1.74
	859	JP74_15780	JQGB01000027	1.74
	860	JP74_21190	JQGB01000047	1.74
	861	JP74_22670	JQGB01000062	1.74
	862	JP74_00220	JQGB01000001	1.74
	863	JP74_06025	JQGB01000010	1.74
	864	JP74_17395	JQGB01000033	1.73
	865	JP74_21975	JQGB01000052	1.73
	866	JP74_11655	JQGB01000020	1.73
	867	JP74_19665	JQGB01000038	1.73
	868	gatA	JQGB01000002	1.73
	869	JP74_20955	JQGB01000047	1.73
	870	JP74_08500	JQGB01000014	1.73
	871	JP74_07685	JQGB01000012	1.73
	872	JP74_12425	JQGB01000021	1.73
	873	JP74_08150	JQGB01000012	1.73
	874	JP74_14865	JQGB01000025	1.73
	875	JP74_03895	JQGB01000005	1.73
	876	JP74_02710	JQGB01000003	1.73
	877	JP74_05820	JQGB01000009	1.73
	878	JP74_16685	JQGB01000029	1.73
	879	JP74_19400	JQGB01000036	1.73
	880	JP74_20435	JQGB01000043	1.73
	881	JP74_00820	JQGB01000002	1.73
	882	JP74_02405	JQGB01000002	1.73
	883	JP74_06180	JQGB01000010	1.73
	884	JP74_07350	JQGB01000012	1.73
	885	JP74_07360	JQGB01000012	1.73
	886	JP74_07770	JQGB01000012	1.73
	887	JP74_08485	JQGB01000013	1.73
	888	JP74_09685	JQGB01000015	1.73
	889	JP74_10675	JQGB01000018	1.73
	890	JP74_11365	JQGB01000020	1.73
	891	JP74_14500	JQGB01000024	1.73
	892	JP74_15260	JQGB01000026	1.73
	893	JP74_18810	JQGB01000035	1.73
	894	JP74_20880	JQGB01000047	1.73
	895	JP74_08345	JQGB01000013	1.73
	896	JP74_08970	JQGB01000015	1.73
	897	JP74_12865	JQGB01000021	1.73
	898	JP74_16975	JQGB01000029	1.73
	899	JP74_18540	JQGB01000035	1.73
	900	JP74_18970	JQGB01000036	1.72
	901	pepN	JQGB01000047	1.72
	902	JP74_18955	JQGB01000036	1.72
	903	JP74_02425	JQGB01000002	1.72
	904	JP74_12760	JQGB01000021	1.72
	905	JP74_06960	JQGB01000012	1.72
	906	JP74_15695	JQGB01000027	1.72
	907	JP74_05115	JQGB01000009	1.72
	908	JP74_21790	JQGB01000050	1.72
	909	JP74_01815	JQGB01000002	1.72
	910	JP74_08335	JQGB01000013	1.72
	911	JP74_15045	JQGB01000025	1.72
	912	JP74_16455	JQGB01000027	1.72
	913	JP74_18415	JQGB01000035	1.72
	914	JP74_01515	JQGB01000002	1.72
	915	JP74_09175	JQGB01000015	1.72
	916	JP74_17865	JQGB01000034	1.72
	917	JP74_08700	JQGB01000014	1.72
	918	JP74_08320	JQGB01000013	1.71
	919	JP74_18845	JQGB01000035	1.71
	920	JP74_11030	JQGB01000019	1.71
	921	JP74_00790	JQGB01000002	1.71
	922	JP74_17025	JQGB01000029	1.71
	923	JP74_20800	JQGB01000045	1.71
	924	JP74_08670	JQGB01000014	1.71
	925	JP74_11120	JQGB01000019	1.71
	926	JP74_22035	JQGB01000052	1.71
	927	clpA	JQGB01000002	1.71
	928	JP74_11335	JQGB01000020	1.71
	929	JP74_10060	JQGB01000016	1.71
	930	JP74_19145	JQGB01000036	1.71
	931	JP74_16635	JQGB01000028	1.71
	932	JP74_11520	JQGB01000020	1.71
	933	JP74_22225	JQGB01000054	1.71
	934	JP74_08975	JQGB01000015	1.71
	935	JP74_18430	JQGB01000035	1.71
	936	JP74_21040	JQGB01000047	1.71
	937	JP74_23260	JQGB01000091	1.71
	938	JP74_04680	JQGB01000007	1.71
	939	JP74_03445	JQGB01000004	1.71
	940	JP74_09575	JQGB01000015	1.71
	941	JP74_06115	JQGB01000010	1.71
	942	JP74_15230	JQGB01000026	1.71
	943	JP74_23085	JQGB01000079	1.71
	944	JP74_06015	JQGB01000010	1.71
	945	JP74_15025	JQGB01000025	1.71
	946	JP74_21605	JQGB01000049	1.71
	947	JP74_09645	JQGB01000015	1.71
	948	JP74_11480	JQGB01000020	1.71
	949	JP74_04500	JQGB01000006	1.7
	950	JP74_07835	JQGB01000012	1.7
	951	JP74_08550	JQGB01000014	1.7
	952	JP74_03665	JQGB01000004	1.7
	953	JP74_11430	JQGB01000020	1.7
	954	JP74_12250	JQGB01000021	1.7
	955	JP74_13005	JQGB01000021	1.7
	956	JP74_05570	JQGB01000009	1.7
	957	JP74_22050	JQGB01000052	1.7
	958	JP74_09745	JQGB01000015	1.7
	959	JP74_21640	JQGB01000049	1.7
	960	JP74_06895	JQGB01000011	1.7
	961	JP74_14160	JQGB01000023	1.7
	962	JP74_15990	JQGB01000027	1.7
	963	JP74_15650	JQGB01000027	1.7
	964	JP74_09435	JQGB01000015	1.7
	965	JP74_10180	JQGB01000016	1.7
	966	JP74_06760	JQGB01000011	1.7
	967	JP74_11780	JQGB01000020	1.7
	968	JP74_05320	JQGB01000009	1.7
	969	JP74_13930	JQGB01000022	1.7
	970	JP74_07280	JQGB01000012	1.7
	971	JP74_12495	JQGB01000021	1.7
	972	JP74_02810	JQGB01000003	1.7
	973	JP74_22465	JQGB01000056	1.7
	974	JP74_01895	JQGB01000002	1.7
	975	JP74_08225	JQGB01000012	1.69
	976	JP74_19740	JQGB01000038	1.69
	977	JP74_01400	JQGB01000002	1.69
	978	JP74_02215	JQGB01000002	1.69
	979	JP74_03790	JQGB01000004	1.69
	980	JP74_05430	JQGB01000009	1.69
	981	JP74_15415	JQGB01000026	1.69
	982	JP74_02655	JQGB01000003	1.69
	983	JP74_20615	JQGB01000045	1.69
	984	JP74_14425	JQGB01000024	1.69
	985	JP74_14085	JQGB01000023	1.69
	986	JP74_06590	JQGB01000010	1.69
	987	JP74_00535	JQGB01000001	1.69
	988	JP74_06345	JQGB01000010	1.69
	989	JP74_05110	JQGB01000009	1.69
	990	JP74_10155	JQGB01000016	1.69
	991	JP74_00115	JQGB01000001	1.69
	992	JP74_09140	JQGB01000015	1.69
	993	JP74_16225	JQGB01000027	1.69
	994	JP74_10065	JQGB01000016	1.69
	995	JP74_21690	JQGB01000049	1.69
	996	JP74_03140	JQGB01000004	1.69
	997	proA	JQGB01000033	1.69
	998	JP74_07690	JQGB01000012	1.69
	999	JP74_04700	JQGB01000007	1.69
	1000	JP74_09550	JQGB01000015	1.69
	1001	JP74_07610	JQGB01000012	1.69
	1002	JP74_06270	JQGB01000010	1.69
	1003	JP74_15940	JQGB01000027	1.69
	1004	JP74_18255	JQGB01000034	1.69
	1005	JP74_04855	JQGB01000008	1.69
	1006	JP74_16535	JQGB01000027	1.69
	1007	JP74_05870	JQGB01000009	1.69
	1008	JP74_06620	JQGB01000011	1.69
	1009	JP74_14065	JQGB01000023	1.69
	1010	JP74_15140	JQGB01000026	1.69
	1011	JP74_16960	JQGB01000029	1.68
	1012	JP74_18285	JQGB01000034	1.68
	1013	JP74_05750	JQGB01000009	1.68
	1014	JP74_20645	JQGB01000045	1.68
	1015	JP74_04655	JQGB01000006	1.68
	1016	JP74_05775	JQGB01000009	1.68
	1017	JP74_07185	JQGB01000012	1.68
	1018	JP74_09500	JQGB01000015	1.68
	1019	JP74_20780	JQGB01000045	1.68
	1020	JP74_10050	JQGB01000016	1.68
	1021	JP74_11035	JQGB01000019	1.68
	1022	JP74_18155	JQGB01000034	1.68
	1023	JP74_22695	JQGB01000062	1.68
	1024	hppA	JQGB01000037	1.68
	1025	JP74_12290	JQGB01000021	1.68
	1026	JP74_20390	JQGB01000043	1.68
	1027	JP74_06650	JQGB01000011	1.68
	1028	JP74_12295	JQGB01000021	1.68
	1029	JP74_08985	JQGB01000015	1.68
	1030	JP74_16980	JQGB01000029	1.68
	1031	JP74_19140	JQGB01000036	1.68
	1032	JP74_01800	JQGB01000002	1.68
	1033	JP74_05520	JQGB01000009	1.68
	1034	JP74_00610	JQGB01000001	1.68
	1035	JP74_04195	JQGB01000006	1.68
	1036	JP74_22150	JQGB01000052	1.68
	1037	JP74_01130	JQGB01000002	1.68
	1038	JP74_06750	JQGB01000011	1.68
	1039	JP74_02645	JQGB01000003	1.68
	1040	JP74_05495	JQGB01000009	1.68
	1041	JP74_03805	JQGB01000004	1.68
	1042	JP74_12545	JQGB01000021	1.68
	1043	JP74_22795	JQGB01000066	1.68
	1044	JP74_06885	JQGB01000011	1.68
	1045	JP74_09485	JQGB01000015	1.68
	1046	JP74_12415	JQGB01000021	1.68
	1047	JP74_11345	JQGB01000020	1.68
	1048	JP74_16875	JQGB01000029	1.68
	1049	JP74_14320	JQGB01000024	1.67
	1050	JP74_01535	JQGB01000002	1.67
	1051	JP74_08285	JQGB01000013	1.67
	1052	JP74_15860	JQGB01000027	1.67
	1053	JP74_02795	JQGB01000003	1.67
	1054	JP74_08915	JQGB01000014	1.67
	1055	JP74_01905	JQGB01000002	1.67
	1056	JP74_04750	JQGB01000007	1.67
	1057	JP74_07850	JQGB01000012	1.67
	1058	JP74_09495	JQGB01000015	1.67
	1059	JP74_21660	JQGB01000049	1.67
	1060	JP74_15225	JQGB01000026	1.67
	1061	JP74_09700	JQGB01000015	1.67
	1062	JP74_08785	JQGB01000014	1.67
	1063	JP74_19065	JQGB01000036	1.67
	1064	JP74_03730	JQGB01000004	1.67
	1065	JP74_11615	JQGB01000020	1.67
	1066	JP74_12355	JQGB01000021	1.67
	1067	JP74_06860	JQGB01000011	1.67
	1068	JP74_21505	JQGB01000049	1.67
	1069	JP74_05565	JQGB01000009	1.67
	1070	JP74_09720	JQGB01000015	1.67
	1071	JP74_04365	JQGB01000006	1.67
	1072	JP74_09255	JQGB01000015	1.67
	1073	JP74_16275	JQGB01000027	1.67
	1074	JP74_16965	JQGB01000029	1.67
	1075	JP74_02350	JQGB01000002	1.66
	1076	JP74_12625	JQGB01000021	1.66
	1077	JP74_09025	JQGB01000015	1.66
	1078	JP74_10625	JQGB01000018	1.66
	1079	JP74_17040	JQGB01000029	1.66
	1080	JP74_23030	JQGB01000075	1.66
	1081	JP74_21330	JQGB01000048	1.66
	1082	JP74_11775	JQGB01000020	1.66
	1083	JP74_08625	JQGB01000014	1.66
	1084	JP74_10090	JQGB01000016	1.66
	1085	JP74_19320	JQGB01000036	1.66
	1086	JP74_21235	JQGB01000047	1.66
	1087	JP74_10640	JQGB01000018	1.66
	1088	JP74_18015	JQGB01000034	1.66
	1089	JP74_12730	JQGB01000021	1.66
	1090	JP74_07590	JQGB01000012	1.66
	1091	JP74_16330	JQGB01000027	1.66
	1092	JP74_11280	JQGB01000020	1.66
	1093	JP74_18850	JQGB01000035	1.66
	1094	JP74_02915	JQGB01000004	1.66
	1095	JP74_05090	JQGB01000009	1.66
	1096	JP74_10500	JQGB01000018	1.66
	1097	JP74_12300	JQGB01000021	1.66
	1098	JP74_14095	JQGB01000023	1.66
	1099	JP74_22320	JQGB01000054	1.66
	1100	JP74_23225	JQGB01000088	1.66
	1101	JP74_23250	JQGB01000091	1.66
	1102	JP74_00230	JQGB01000001	1.66
	1103	JP74_06225	JQGB01000010	1.66
	1104	JP74_06775	JQGB01000011	1.66
	1105	JP74_18190	JQGB01000034	1.66
	1106	JP74_20145	JQGB01000041	1.66
	1107	JP74_21010	JQGB01000047	1.66
	1108	JP74_21825	JQGB01000050	1.66
	1109	JP74_21990	JQGB01000052	1.66
	1110	JP74_06805	JQGB01000011	1.66
	1111	JP74_17005	JQGB01000029	1.65
	1112	JP74_05295	JQGB01000009	1.65
	1113	JP74_08890	JQGB01000014	1.65
	1114	JP74_11205	JQGB01000019	1.65
	1115	JP74_09330	JQGB01000015	1.65
	1116	JP74_18315	JQGB01000034	1.65
	1117	JP74_04930	JQGB01000009	1.65
	1118	JP74_02280	JQGB01000002	1.65
	1119	JP74_01445	JQGB01000002	1.65
	1120	JP74_09915	JQGB01000015	1.65
	1121	JP74_11475	JQGB01000020	1.65
	1122	JP74_13115	JQGB01000021	1.65
	1123	JP74_11080	JQGB01000019	1.65
	1124	JP74_20655	JQGB01000045	1.65
	1125	JP74_04220	JQGB01000006	1.65
	1126	JP74_09820	JQGB01000015	1.65
	1127	JP74_11925	JQGB01000020	1.65
	1128	JP74_16900	JQGB01000029	1.65
	1129	pleD	JQGB01000002	1.65
	1130	JP74_17970	JQGB01000034	1.65
	1131	JP74_05720	JQGB01000009	1.65
	1132	JP74_03070	JQGB01000004	1.65
	1133	JP74_00160	JQGB01000001	1.65
	1134	JP74_04565	JQGB01000006	1.64
	1135	JP74_00170	JQGB01000001	1.64
	1136	JP74_18470	JQGB01000035	1.64
	1137	JP74_04340	JQGB01000006	1.64
	1138	JP74_21530	JQGB01000049	1.64
	1139	JP74_00025	JQGB01000001	1.64
	1140	JP74_17490	JQGB01000033	1.64
	1141	JP74_17535	JQGB01000033	1.64
	1142	JP74_00555	JQGB01000001	1.64
	1143	JP74_00975	JQGB01000002	1.64
	1144	JP74_01135	JQGB01000002	1.64
	1145	JP74_20690	JQGB01000045	1.64
	1146	JP74_04065	JQGB01000005	1.64
	1147	JP74_07815	JQGB01000012	1.64
	1148	JP74_15795	JQGB01000027	1.64
	1149	JP74_17675	JQGB01000034	1.64
	1150	JP74_22455	JQGB01000056	1.64
	1151	JP74_14470	JQGB01000024	1.64
	1152	JP74_18020	JQGB01000034	1.64
	1153	JP74_08205	JQGB01000012	1.64
	1154	JP74_15420	JQGB01000026	1.64
	1155	JP74_14440	JQGB01000024	1.64
	1156	JP74_01805	JQGB01000002	1.64
	1157	JP74_19385	JQGB01000036	1.64
	1158	JP74_00615	JQGB01000001	1.64
	1159	JP74_19690	JQGB01000038	1.64
	1160	JP74_18220	JQGB01000034	1.63
	1161	JP74_12155	JQGB01000021	1.63
	1162	JP74_20060	JQGB01000040	1.63
	1163	JP74_20990	JQGB01000047	1.63
	1164	JP74_13375	JQGB01000022	1.63
	1165	JP74_14455	JQGB01000024	1.63
	1166	JP74_20165	JQGB01000041	1.63
	1167	JP74_12320	JQGB01000021	1.63
	1168	JP74_22105	JQGB01000052	1.63
	1169	JP74_16095	JQGB01000027	1.63
	1170	JP74_06010	JQGB01000010	1.63
	1171	JP74_11890	JQGB01000020	1.63
	1172	JP74_23270	JQGB01000091	1.63
	1173	JP74_01405	JQGB01000002	1.63
	1174	JP74_14235	JQGB01000023	1.63
	1175	JP74_09810	JQGB01000015	1.63
	1176	JP74_08080	JQGB01000012	1.63
	1177	JP74_01825	JQGB01000002	1.63
	1178	JP74_16285	JQGB01000027	1.63
	1179	JP74_07785	JQGB01000012	1.63
	1180	JP74_06230	JQGB01000010	1.63
	1181	JP74_02200	JQGB01000002	1.63
	1182	JP74_12950	JQGB01000021	1.63
	1183	JP74_12775	JQGB01000021	1.63
	1184	JP74_00090	JQGB01000001	1.63
	1185	JP74_06195	JQGB01000010	1.63
	1186	JP74_12220	JQGB01000021	1.63
	1187	JP74_18095	JQGB01000034	1.63
	1188	JP74_00670	JQGB01000001	1.63
	1189	JP74_06510	JQGB01000010	1.63
	1190	JP74_10710	JQGB01000018	1.63
	1191	JP74_10725	JQGB01000018	1.63
	1192	JP74_12140	JQGB01000021	1.63
	1193	JP74_15705	JQGB01000027	1.63
	1194	JP74_16020	JQGB01000027	1.63
	1195	JP74_21490	JQGB01000049	1.63
	1196	JP74_21560	JQGB01000049	1.63
	1197	JP74_14125	JQGB01000023	1.63
	1198	JP74_14010	JQGB01000022	1.63
	1199	JP74_21485	JQGB01000049	1.63
	1200	JP74_19855	JQGB01000040	1.62
	1201	JP74_21710	JQGB01000049	1.62
	1202	JP74_03145	JQGB01000004	1.62
	1203	JP74_18380	JQGB01000035	1.62
	1204	JP74_02840	JQGB01000003	1.62
	1205	JP74_22070	JQGB01000052	1.62
	1206	JP74_12910	JQGB01000021	1.62
	1207	JP74_21635	JQGB01000049	1.62
	1208	JP74_01505	JQGB01000002	1.62
	1209	JP74_16990	JQGB01000029	1.62
	1210	JP74_05395	JQGB01000009	1.62
	1211	JP74_14510	JQGB01000024	1.62
	1212	JP74_16295	JQGB01000027	1.62
	1213	JP74_14755	JQGB01000025	1.62
	1214	JP74_00290	JQGB01000001	1.62
	1215	JP74_13000	JQGB01000021	1.62
	1216	JP74_07020	JQGB01000012	1.62
	1217	JP74_02815	JQGB01000003	1.62
	1218	JP74_01260	JQGB01000002	1.62
	1219	JP74_03585	JQGB01000004	1.62
	1220	JP74_11735	JQGB01000020	1.62
	1221	JP74_02565	JQGB01000002	1.62
	1222	JP74_03900	JQGB01000005	1.62
	1223	JP74_04140	JQGB01000006	1.62
	1224	JP74_06905	JQGB01000011	1.62
	1225	JP74_18460	JQGB01000035	1.62
	1226	JP74_09885	JQGB01000015	1.62
	1227	JP74_20950	JQGB01000047	1.62
	1228	JP74_13900	JQGB01000022	1.61
	1229	JP74_02625	JQGB01000003	1.61
	1230	JP74_11250	JQGB01000020	1.61
	1231	JP74_14775	JQGB01000025	1.61
	1232	JP74_03115	JQGB01000004	1.61
	1233	JP74_00070	JQGB01000001	1.61
	1234	JP74_18225	JQGB01000034	1.61
	1235	JP74_19530	JQGB01000037	1.61
	1236	JP74_07600	JQGB01000012	1.61
	1237	JP74_07790	JQGB01000012	1.61
	1238	JP74_08960	JQGB01000015	1.61
	1239	JP74_17770	JQGB01000034	1.61
	1240	JP74_20465	JQGB01000043	1.61
	1241	JP74_22755	JQGB01000063	1.61
	1242	JP74_13675	JQGB01000022	1.61
	1243	pgk (JQGB01000026 6708..7911)	JQGB01000026	1.61
	1244	JP74_09905	JQGB01000015	1.61
	1245	JP74_03595	JQGB01000004	1.61
	1246	JP74_16435	JQGB01000027	1.61
	1247	JP74_14240	JQGB01000023	1.61
	1248	JP74_14130	JQGB01000023	1.61
	1249	JP74_18330	JQGB01000034	1.61
	1250	JP74_09580	JQGB01000015	1.61
	1251	JP74_05950	JQGB01000009	1.61
	1252	JP74_12215	JQGB01000021	1.61
	1253	JP74_12680	JQGB01000021	1.61
	1254	JP74_20620	JQGB01000045	1.61
	1255	JP74_08795	JQGB01000014	1.61
	1256	JP74_08115	JQGB01000012	1.6
	1257	JP74_19205	JQGB01000036	1.6
	1258	JP74_07460	JQGB01000012	1.6
	1259	JP74_12185	JQGB01000021	1.6
	1260	JP74_12400	JQGB01000021	1.6
	1261	JP74_08505	JQGB01000014	1.6
	1262	JP74_17530	JQGB01000033	1.6
	1263	JP74_19615	JQGB01000038	1.6
	1264	JP74_07730	JQGB01000012	1.6
	1265	JP74_10095	JQGB01000016	1.6
	1266	pyrB	JQGB01000002	1.6
	1267	JP74_08360	JQGB01000013	1.6
	1268	JP74_10120	JQGB01000016	1.6
	1269	JP74_09845	JQGB01000015	1.6
	1270	JP74_01355	JQGB01000002	1.6
	1271	JP74_13810	JQGB01000022	1.6
	1272	JP74_21535	JQGB01000049	1.6
	1273	JP74_14860	JQGB01000025	1.6
	1274	JP74_15185	JQGB01000026	1.6
	1275	JP74_21730	JQGB01000050	1.6
	1276	JP74_22645	JQGB01000062	1.6
	1277	JP74_11760	JQGB01000020	1.6
	1278	JP74_21930	JQGB01000052	1.6
	1279	JP74_12660	JQGB01000021	1.6
	1280	JP74_14790	JQGB01000025	1.6
	1281	JP74_09515	JQGB01000015	1.6
	1282	JP74_12565	JQGB01000021	1.6
	1283	JP74_07490	JQGB01000012	1.6
	1284	JP74_21695	JQGB01000049	1.6
	1285	JP74_09395	JQGB01000015	1.6
	1286	JP74_22410	JQGB01000055	1.6
	1287	JP74_14200	JQGB01000023	1.6
	1288	JP74_14870	JQGB01000025	1.6
	1289	JP74_18320	JQGB01000034	1.59
	1290	JP74_17715	JQGB01000034	1.59
	1291	JP74_00530	JQGB01000001	1.59
	1292	JP74_11800	JQGB01000020	1.59
	1293	JP74_09790	JQGB01000015	1.59
	1294	JP74_07735	JQGB01000012	1.59
	1295	JP74_06430	JQGB01000010	1.59
	1296	JP74_03095	JQGB01000004	1.59
	1297	JP74_04635	JQGB01000006	1.59
	1298	JP74_05915	JQGB01000009	1.59
	1299	JP74_10010	JQGB01000016	1.59
	1300	JP74_12530	JQGB01000021	1.59
	1301	JP74_12690	JQGB01000021	1.59
	1302	JP74_13490	JQGB01000022	1.59
	1303	JP74_16920	JQGB01000029	1.59
	1304	JP74_19840	JQGB01000040	1.59
	1305	JP74_08595	JQGB01000014	1.59
	1306	JP74_15290	JQGB01000026	1.59
	1307	JP74_13765	JQGB01000022	1.59
	1308	JP74_12980	JQGB01000021	1.59
	1309	JP74_21230	JQGB01000047	1.59
	1310	JP74_14975	JQGB01000025	1.59
	1311	JP74_05585	JQGB01000009	1.59
	1312	JP74_14015	JQGB01000022	1.59
	1313	JP74_00335	JQGB01000001	1.59
	1314	JP74_10635	JQGB01000018	1.59
	1315	JP74_22395	JQGB01000055	1.59
	1316	JP74_04180	JQGB01000006	1.59
	1317	JP74_16520	JQGB01000027	1.59
	1318	JP74_17960	JQGB01000034	1.59
	1319	JP74_05420	JQGB01000009	1.59
	1320	JP74_02805	JQGB01000003	1.59
	1321	JP74_08220	JQGB01000012	1.59
	1322	JP74_10470	JQGB01000018	1.59
	1323	oppB	JQGB01000026	1.59
	1324	JP74_05805	JQGB01000009	1.59
	1325	JP74_09060	JQGB01000015	1.59
	1326	glmU	JQGB01000027	1.59
	1327	JP74_03815	JQGB01000004	1.59
	1328	JP74_18400	JQGB01000035	1.59
	1329	JP74_20855	JQGB01000047	1.59
	1330	cpdB	JQGB01000020	1.59
	1331	JP74_05620	JQGB01000009	1.59
	1332	JP74_03740	JQGB01000004	1.59
	1333	JP74_23130	JQGB01000081	1.59
	1334	JP74_11825	JQGB01000020	1.59
	1335	JP74_21515	JQGB01000049	1.58
	1336	JP74_08660	JQGB01000014	1.58
	1337	JP74_09695	JQGB01000015	1.58
	1338	JP74_07440	JQGB01000012	1.58
	1339	JP74_20520	JQGB01000044	1.58
	1340	JP74_02720	JQGB01000003	1.58
	1341	JP74_15305	JQGB01000026	1.58
	1342	JP74_09640	JQGB01000015	1.58
	1343	JP74_22030	JQGB01000052	1.58
	1344	JP74_00585	JQGB01000001	1.58
	1345	JP74_03575	JQGB01000004	1.58
	1346	JP74_16305	JQGB01000027	1.58
	1347	JP74_07040	JQGB01000012	1.58
	1348	JP74_07105	JQGB01000012	1.58
	1349	JP74_11500	JQGB01000020	1.58
	1350	JP74_17330	JQGB01000033	1.58
	1351	JP74_08000	JQGB01000012	1.58
	1352	JP74_18100	JQGB01000034	1.58
	1353	JP74_14365	JQGB01000024	1.58
	1354	JP74_13695	JQGB01000022	1.58
	1355	JP74_16420	JQGB01000027	1.58
	1356	JP74_22690	JQGB01000062	1.58
	1357	JP74_17850	JQGB01000034	1.58
	1358	JP74_14555	JQGB01000024	1.58
	1359	JP74_08790	JQGB01000014	1.58
	1360	fumC	JQGB01000036	1.58
	1361	JP74_17775	JQGB01000034	1.58
	1362	JP74_17695	JQGB01000034	1.58
	1363	JP74_08610	JQGB01000014	1.57
	1364	JP74_07765	JQGB01000012	1.57
	1365	JP74_10135	JQGB01000016	1.57
	1366	JP74_13295	JQGB01000022	1.57
	1367	JP74_18370	JQGB01000035	1.57
	1368	JP74_21210	JQGB01000047	1.57
	1369	JP74_19060	JQGB01000036	1.57
	1370	JP74_12890	JQGB01000021	1.57
	1371	JP74_17925	JQGB01000034	1.57
	1372	JP74_15170	JQGB01000026	1.57
	1373	JP74_01320	JQGB01000002	1.57
	1374	JP74_07445	JQGB01000012	1.57
	1375	JP74_16045	JQGB01000027	1.57
	1376	JP74_19265	JQGB01000036	1.57
	1377	JP74_03705	JQGB01000004	1.57
	1378	JP74_04755	JQGB01000007	1.57
	1379	JP74_13250	JQGB01000022	1.57
	1380	JP74_23095	JQGB01000079	1.57
	1381	JP74_11605	JQGB01000020	1.57
	1382	JP74_12995	JQGB01000021	1.57
	1383	JP74_08425	JQGB01000013	1.57
	1384	JP74_18195	JQGB01000034	1.57
	1385	JP74_17870	JQGB01000034	1.57
	1386	JP74_22975	JQGB01000072	1.57
	1387	JP74_11610	JQGB01000020	1.57
	1388	JP74_22650	JQGB01000062	1.57
	1389	JP74_08025	JQGB01000012	1.57
	1390	JP74_02295	JQGB01000002	1.57
	1391	JP74_16365	JQGB01000027	1.57
	1392	JP74_01450	JQGB01000002	1.57
	1393	JP74_11325	JQGB01000020	1.57
	1394	JP74_15820	JQGB01000027	1.57
	1395	JP74_13710	JQGB01000022	1.57
	1396	JP74_06570	JQGB01000010	1.57
	1397	JP74_08605	JQGB01000014	1.57
	1398	JP74_12205	JQGB01000021	1.57
	1399	JP74_05055	JQGB01000009	1.57
	1400	JP74_10100	JQGB01000016	1.56
	1401	JP74_10620	JQGB01000018	1.56
	1402	JP74_15575	JQGB01000027	1.56
	1403	JP74_02135	JQGB01000002	1.56
	1404	JP74_03530	JQGB01000004	1.56
	1405	JP74_01115	JQGB01000002	1.56
	1406	rbcL	JQGB01000004	1.56
	1407	JP74_05415	JQGB01000009	1.56
	1408	JP74_09260	JQGB01000015	1.56
	1409	JP74_20695	JQGB01000045	1.56
	1410	JP74_01830	JQGB01000002	1.56
	1411	JP74_18240	JQGB01000034	1.56
	1412	JP74_14690	JQGB01000025	1.56
	1413	JP74_16485	JQGB01000027	1.56
	1414	JP74_17225	JQGB01000031	1.56
	1415	JP74_08495	JQGB01000014	1.56
	1416	JP74_07695	JQGB01000012	1.56
	1417	JP74_10260	JQGB01000017	1.56
	1418	JP74_00240	JQGB01000001	1.56
	1419	JP74_00745	JQGB01000002	1.56
	1420	sucC	JQGB01000009	1.56
	1421	JP74_04590	JQGB01000006	1.56
	1422	JP74_06705	JQGB01000011	1.56
	1423	JP74_06810	JQGB01000011	1.56
	1424	JP74_20945	JQGB01000047	1.56
	1425	JP74_11470	JQGB01000020	1.56
	1426	JP74_00710	JQGB01000001	1.56
	1427	fliI	JQGB01000001	1.56
	1428	JP74_08135	JQGB01000012	1.56
	1429	JP74_00770	JQGB01000002	1.55
	1430	JP74_01055	JQGB01000002	1.55
	1431	JP74_01465	JQGB01000002	1.55
	1432	JP74_01695	JQGB01000002	1.55
	1433	JP74_04280	JQGB01000006	1.55
	1434	JP74_08955	JQGB01000015	1.55
	1435	JP74_10020	JQGB01000016	1.55
	1436	JP74_11165	JQGB01000019	1.55
	1437	JP74_11675	JQGB01000020	1.55
	1438	JP74_12770	JQGB01000021	1.55
	1439	JP74_13665	JQGB01000022	1.55
	1440	JP74_14695	JQGB01000025	1.55
	1441	JP74_14720	JQGB01000025	1.55
	1442	JP74_14965	JQGB01000025	1.55
	1443	JP74_15985	JQGB01000027	1.55
	1444	JP74_16450	JQGB01000027	1.55
	1445	JP74_16620	JQGB01000028	1.55
	1446	JP74_18610	JQGB01000035	1.55
	1447	JP74_18930	JQGB01000036	1.55
	1448	JP74_19775	JQGB01000038	1.55
	1449	JP74_22820	JQGB01000067	1.55
	1450	fadE	JQGB01000026	1.55
	1451	JP74_00955	JQGB01000002	1.55
	1452	JP74_02910	JQGB01000004	1.55
	1453	JP74_03105	JQGB01000004	1.55
	1454	JP74_03925	JQGB01000005	1.55
	1455	JP74_04355	JQGB01000006	1.55
	1456	JP74_06955	JQGB01000012	1.55
	1457	JP74_07260	JQGB01000012	1.55
	1458	JP74_08060	JQGB01000012	1.55
	1459	JP74_08375	JQGB01000013	1.55
	1460	JP74_12620	JQGB01000021	1.55
	1461	JP74_13300	JQGB01000022	1.55
	1462	JP74_15335	JQGB01000026	1.55
	1463	JP74_15600	JQGB01000027	1.55
	1464	JP74_15700	JQGB01000027	1.55
	1465	JP74_18450	JQGB01000035	1.55
	1466	JP74_19360	JQGB01000036	1.55
	1467	JP74_19475	JQGB01000037	1.55
	1468	JP74_21595	JQGB01000049	1.55
	1469	JP74_22295	JQGB01000054	1.55
	1470	JP74_04150	JQGB01000006	1.55
	1471	JP74_16905	JQGB01000029	1.55
	1472	JP74_03965	JQGB01000005	1.55
	1473	JP74_22140	JQGB01000052	1.55
	1474	JP74_00325	JQGB01000001	1.55
	1475	JP74_18660	JQGB01000035	1.55
	1476	JP74_08615	JQGB01000014	1.55
	1477	JP74_05605	JQGB01000009	1.55
	1478	JP74_12210	JQGB01000021	1.55
	1479	JP74_14465	JQGB01000024	1.55
	1480	JP74_16795	JQGB01000029	1.55
	1481	JP74_15855	JQGB01000027	1.55
	1482	JP74_18160	JQGB01000034	1.55
	1483	JP74_06065	JQGB01000010	1.55
	1484	JP74_18360	JQGB01000034	1.54
	1485	JP74_18410	JQGB01000035	1.54
	1486	JP74_18905	JQGB01000035	1.54
	1487	JP74_18230	JQGB01000034	1.54
	1488	JP74_12115	JQGB01000021	1.54
	1489	JP74_06050	JQGB01000010	1.54
	1490	JP74_00660	JQGB01000001	1.54
	1491	JP74_23070	JQGB01000079	1.54
	1492	JP74_19440	JQGB01000037	1.54
	1493	JP74_15160	JQGB01000026	1.54
	1494	JP74_07840	JQGB01000012	1.54
	1495	JP74_16725	JQGB01000029	1.54
	1496	JP74_12915	JQGB01000021	1.54
	1497	JP74_22460	JQGB01000056	1.54
	1498	JP74_21765	JQGB01000050	1.54
	1499	JP74_23170	JQGB01000083	1.54
	1500	JP74_22230	JQGB01000054	1.54
	1501	flhA	JQGB01000001	1.54
	1502	JP74_07885	JQGB01000012	1.54
	1503	JP74_15905	JQGB01000027	1.54
	1504	JP74_03270	JQGB01000004	1.54
	1505	JP74_11795	JQGB01000020	1.54
	1506	JP74_08895	JQGB01000014	1.54
	1507	JP74_04625	JQGB01000006	1.54
	1508	JP74_06640	JQGB01000011	1.54
	1509	JP74_16640	JQGB01000028	1.54
	1510	JP74_21995	JQGB01000052	1.54
	1511	JP74_14640	JQGB01000024	1.54
	1512	JP74_03470	JQGB01000004	1.54
	1513	JP74_05225	JQGB01000009	1.54
	1514	JP74_03265	JQGB01000004	1.54
	1515	JP74_08935	JQGB01000014	1.54
	1516	JP74_18950	JQGB01000036	1.54
	1517	JP74_22220	JQGB01000054	1.54
	1518	JP74_16370	JQGB01000027	1.54
	1519	JP74_01160	JQGB01000002	1.54
	1520	JP74_05895	JQGB01000009	1.54
	1521	JP74_06535	JQGB01000010	1.54
	1522	JP74_12030	JQGB01000020	1.54
	1523	JP74_12970	JQGB01000021	1.54
	1524	JP74_02600	JQGB01000002	1.54
	1525	JP74_05280	JQGB01000009	1.54
	1526	JP74_14035	JQGB01000022	1.54
	1527	JP74_00245	JQGB01000001	1.54
	1528	JP74_05890	JQGB01000009	1.53
	1529	JP74_06765	JQGB01000011	1.53
	1530	JP74_20875	JQGB01000047	1.53
	1531	JP74_12930	JQGB01000021	1.53
	1532	JP74_00105	JQGB01000001	1.53
	1533	JP74_02780	JQGB01000003	1.53
	1534	JP74_10400	JQGB01000017	1.53
	1535	JP74_19335	JQGB01000036	1.53
	1536	JP74_23265	JQGB01000091	1.53
	1537	JP74_04450	JQGB01000006	1.53
	1538	JP74_05970	JQGB01000009	1.53
	1539	JP74_21685	JQGB01000049	1.53
	1540	JP74_23185	JQGB01000085	1.53
	1541	JP74_10815	JQGB01000018	1.53
	1542	JP74_22860	JQGB01000067	1.53
	1543	JP74_08095	JQGB01000012	1.53
	1544	JP74_09465	JQGB01000015	1.53
	1545	JP74_10885	JQGB01000018	1.53
	1546	JP74_00165	JQGB01000001	1.53
	1547	JP74_18495	JQGB01000035	1.53
	1548	JP74_06350	JQGB01000010	1.53
	1549	JP74_01725	JQGB01000002	1.53
	1550	JP74_17355	JQGB01000033	1.53
	1551	JP74_17710	JQGB01000034	1.53
	1552	JP74_09895	JQGB01000015	1.53
	1553	JP74_18150	JQGB01000034	1.53
	1554	JP74_03955	JQGB01000005	1.53
	1555	JP74_09180	JQGB01000015	1.53
	1556	JP74_15450	JQGB01000026	1.53
	1557	JP74_20125	JQGB01000041	1.53
	1558	cpsB	JQGB01000022	1.53
	1559	JP74_02455	JQGB01000002	1.53
	1560	JP74_15270	JQGB01000026	1.53
	1561	JP74_15910	JQGB01000027	1.52
	1562	JP74_05945	JQGB01000009	1.52
	1563	JP74_15750	JQGB01000027	1.52
	1564	JP74_05510	JQGB01000009	1.52
	1565	JP74_13545	JQGB01000022	1.52
	1566	JP74_00205	JQGB01000001	1.52
	1567	JP74_03365	JQGB01000004	1.52
	1568	JP74_13080	JQGB01000021	1.52
	1569	JP74_19825	JQGB01000039	1.52
	1570	JP74_15240	JQGB01000026	1.52
	1571	JP74_03425	JQGB01000004	1.52
	1572	JP74_05485	JQGB01000009	1.52
	1573	JP74_13110	JQGB01000021	1.52
	1574	moaC	JQGB01000027	1.52
	1575	JP74_08435	JQGB01000013	1.52
	1576	JP74_14450	JQGB01000024	1.52
	1577	JP74_17505	JQGB01000033	1.52
	1578	JP74_11485	JQGB01000020	1.52
	1579	JP74_13950	JQGB01000022	1.52
	1580	JP74_12700	JQGB01000021	1.52
	1581	JP74_04545	JQGB01000006	1.52
	1582	JP74_16055	JQGB01000027	1.52
	1583	JP74_09650	JQGB01000015	1.52
	1584	JP74_20705	JQGB01000045	1.52
	1585	JP74_05690	JQGB01000009	1.52
	1586	JP74_14520	JQGB01000024	1.52
	1587	JP74_05545	JQGB01000009	1.52
	1588	JP74_21965	JQGB01000052	1.52
	1589	JP74_11785	JQGB01000020	1.52
	1590	JP74_05955	JQGB01000009	1.52
	1591	JP74_15555	JQGB01000026	1.52
	1592	JP74_20535	JQGB01000044	1.52
	1593	JP74_08275	JQGB01000013	1.52
	1594	JP74_04965	JQGB01000009	1.52
	1595	JP74_13220	JQGB01000022	1.52
	1596	JP74_13175	JQGB01000022	1.52
	1597	JP74_06780	JQGB01000011	1.52
	1598	JP74_08120	JQGB01000012	1.52
	1599	JP74_17820	JQGB01000034	1.52
	1600	JP74_17620	JQGB01000033	1.52
	1601	JP74_01810	JQGB01000002	1.52
	1602	JP74_00915	JQGB01000002	1.51
	1603	JP74_02525	JQGB01000002	1.51
	1604	JP74_16845	JQGB01000029	1.51
	1605	JP74_19835	JQGB01000039	1.51
	1606	JP74_00825	JQGB01000002	1.51
	1607	JP74_02085	JQGB01000002	1.51
	1608	JP74_02640	JQGB01000003	1.51
	1609	JP74_07980	JQGB01000012	1.51
	1610	JP74_13460	JQGB01000022	1.51
	1611	JP74_15280	JQGB01000026	1.51
	1612	JP74_21160	JQGB01000047	1.51
	1613	JP74_23140	JQGB01000081	1.51
	1614	JP74_09210	JQGB01000015	1.51
	1615	JP74_08905	JQGB01000014	1.51
	1616	JP74_13815	JQGB01000022	1.51
	1617	JP74_05210	JQGB01000009	1.51
	1618	JP74_06450	JQGB01000010	1.51
	1619	JP74_04415	JQGB01000006	1.51
	1620	JP74_05445	JQGB01000009	1.51
	1621	JP74_06130	JQGB01000010	1.51
	1622	JP74_07870	JQGB01000012	1.51
	1623	JP74_05780	JQGB01000009	1.51
	1624	JP74_12085	JQGB01000021	1.51
	1625	JP74_09310	JQGB01000015	1.51
	1626	JP74_23275	JQGB01000091	1.51
	1627	JP74_07375	JQGB01000012	1.51
	1628	JP74_19580	JQGB01000038	1.51
	1629	JP74_04875	JQGB01000008	1.51
	1630	JP74_06220	JQGB01000010	1.51
	1631	JP74_10435	JQGB01000017	1.51
	1632	JP74_12465	JQGB01000021	1.51
	1633	JP74_15015	JQGB01000025	1.51
	1634	JP74_20785	JQGB01000045	1.51
	1635	JP74_19830	JQGB01000039	1.5
	1636	JP74_17660	JQGB01000034	1.5
	1637	JP74_21800	JQGB01000050	1.5
	1638	JP74_06515	JQGB01000010	1.5
	1639	JP74_17945	JQGB01000034	1.5
	1640	JP74_05245	JQGB01000009	1.5
	1641	JP74_12630	JQGB01000021	1.5
	1642	JP74_06105	JQGB01000010	1.5
	1643	JP74_06560	JQGB01000010	1.5
	1644	JP74_19230	JQGB01000036	1.5
	1645	JP74_05745	JQGB01000009	1.5
	1646	JP74_14005	JQGB01000022	1.5
	1647	JP74_00855	JQGB01000002	1.5
	1648	JP74_18640	JQGB01000035	1.5
	1649	JP74_06110	JQGB01000010	1.5
	1650	JP74_18525	JQGB01000035	1.5
	1651	JP74_12000	JQGB01000020	1.5
	1652	JP74_07080	JQGB01000012	1.5
	1653	JP74_14295	JQGB01000024	1.5
	1654	flgI	JQGB01000002	1.5
	1655	JP74_10265	JQGB01000017	1.5
	1656	JP74_09865	JQGB01000015	1.5
	1657	JP74_17825	JQGB01000034	1.5
	1658	JP74_18120	JQGB01000034	1.5
	1659	JP74_00425	JQGB01000001	1.5
	1660	JP74_00485	JQGB01000001	1.5
	1661	JP74_07855	JQGB01000012	1.5
	1662	JP74_13730	JQGB01000022	1.5
	1663	JP74_16120	JQGB01000027	1.5
	1664	JP74_20900	JQGB01000047	1.5
	1665	JP74_04125	JQGB01000006	1.5
	1666	dppD (JQGB01000033 31242..32268)	JQGB01000033	1.5
	1667	JP74_15390	JQGB01000026	1.5
	1668	JP74_11645	JQGB01000020	1.5
	1669	JP74_08165	JQGB01000012	1.5
	1670	JP74_09470	JQGB01000015	1.5
	1671	JP74_17905	JQGB01000034	1.5
	1672	JP74_03205	JQGB01000004	1.5
	1673	JP74_02320	JQGB01000002	1.5
	1674	JP74_03345	JQGB01000004	1.5
	1675	JP74_04515	JQGB01000006	1.5
	1676	JP74_06675	JQGB01000011	1.5
	1677	JP74_11720	JQGB01000020	1.5
	1678	JP74_15970	JQGB01000027	1.5
	1679	JP74_17055	JQGB01000029	1.5
	1680	JP74_20425	JQGB01000043	1.5
	1681	JP74_21280	JQGB01000048	1.5
	1682	JP74_01980	JQGB01000002	1.5
	1683	JP74_02110	JQGB01000002	1.5
	1684	JP74_07660	JQGB01000012	1.5
	1685	JP74_09975	JQGB01000016	1.5
	1686	JP74_12340	JQGB01000021	1.5
	1687	JP74_14330	JQGB01000024	1.5
	1688	JP74_18210	JQGB01000034	1.5
	1689	JP74_20035	JQGB01000040	1.5
	1690	JP74_19515	JQGB01000037	1.5
	1691	JP74_07225	JQGB01000012	1.49
	1692	JP74_06890	JQGB01000011	1.49
	1693	JP74_00125	JQGB01000001	1.49
	1694	JP74_03770	JQGB01000004	1.49
	1695	JP74_08865	JQGB01000014	1.49
	1696	JP74_17285	JQGB01000031	1.49
	1697	JP74_10985	JQGB01000018	1.49
	1698	JP74_06855	JQGB01000011	1.49
	1699	JP74_01935	JQGB01000002	1.49
	1700	JP74_03465	JQGB01000004	1.49
	1701	JP74_10850	JQGB01000018	1.49
	1702	JP74_22965	JQGB01000072	1.49
	1703	JP74_16970	JQGB01000029	1.49
	1704	JP74_14505	JQGB01000024	1.49
	1705	JP74_02430	JQGB01000002	1.49
	1706	purH	JQGB01000090	1.49
	1707	JP74_22985	JQGB01000072	1.49
	1708	JP74_19165	JQGB01000036	1.49
	1709	JP74_13020	JQGB01000021	1.49
	1710	JP74_10025	JQGB01000016	1.49
	1711	JP74_20255	JQGB01000041	1.49
	1712	JP74_04320	JQGB01000006	1.49
	1713	JP74_01700	JQGB01000002	1.49
	1714	JP74_09475	JQGB01000015	1.49
	1715	JP74_12635	JQGB01000021	1.49
	1716	JP74_12870	JQGB01000021	1.49
	1717	JP74_10865	JQGB01000018	1.49
	1718	JP74_11865	JQGB01000020	1.49
	1719	JP74_18180	JQGB01000034	1.49
	1720	JP74_02130	JQGB01000002	1.49
	1721	JP74_23035	JQGB01000076	1.49
	1722	JP74_22935	JQGB01000071	1.49
	1723	mraY	JQGB01000012	1.49
	1724	JP74_00840	JQGB01000002	1.49
	1725	JP74_01175	JQGB01000002	1.49
	1726	JP74_04920	JQGB01000009	1.49
	1727	JP74_07985	JQGB01000012	1.48
	1728	JP74_18920	JQGB01000035	1.48
	1729	JP74_02775	JQGB01000003	1.48
	1730	JP74_12725	JQGB01000021	1.48
	1731	JP74_03915	JQGB01000005	1.48
	1732	JP74_17310	JQGB01000031	1.48
	1733	JP74_13130	JQGB01000022	1.48
	1734	JP74_12435	JQGB01000021	1.48
	1735	JP74_05425	JQGB01000009	1.48
	1736	JP74_11970	JQGB01000020	1.48
	1737	JP74_21405	JQGB01000048	1.48
	1738	JP74_19010	JQGB01000036	1.48
	1739	JP74_07150	JQGB01000012	1.48
	1740	JP74_20585	JQGB01000045	1.48
	1741	JP74_17115	JQGB01000030	1.48
	1742	JP74_01210	JQGB01000002	1.48
	1743	JP74_07865	JQGB01000012	1.48
	1744	JP74_20050	JQGB01000040	1.48
	1745	JP74_03225	JQGB01000004	1.48
	1746	JP74_04170	JQGB01000006	1.48
	1747	JP74_12925	JQGB01000021	1.48
	1748	JP74_10475	JQGB01000018	1.48
	1749	JP74_12025	JQGB01000020	1.48
	1750	JP74_12490	JQGB01000021	1.48
	1751	JP74_17280	JQGB01000031	1.48
	1752	JP74_17740	JQGB01000034	1.48
	1753	JP74_00750	JQGB01000002	1.48
	1754	JP74_00895	JQGB01000002	1.48
	1755	JP74_01295	JQGB01000002	1.48
	1756	JP74_02700	JQGB01000003	1.48
	1757	JP74_03985	JQGB01000005	1.48
	1758	JP74_04605	JQGB01000006	1.48
	1759	JP74_06440	JQGB01000010	1.48
	1760	JP74_06615	JQGB01000011	1.48
	1761	JP74_11700	JQGB01000020	1.48
	1762	JP74_13380	JQGB01000022	1.48
	1763	JP74_17000	JQGB01000029	1.48
	1764	JP74_17730	JQGB01000034	1.48
	1765	JP74_19695	JQGB01000038	1.48
	1766	JP74_21315	JQGB01000048	1.48
	1767	JP74_22390	JQGB01000055	1.48
	1768	JP74_12850	JQGB01000021	1.48
	1769	JP74_01285	JQGB01000002	1.48
	1770	JP74_08655	JQGB01000014	1.48
	1771	JP74_13385	JQGB01000022	1.48
	1772	JP74_04485	JQGB01000006	1.48
	1773	JP74_12935	JQGB01000021	1.48
	1774	JP74_09800	JQGB01000015	1.48
	1775	JP74_04730	JQGB01000007	1.48
	1776	JP74_05965	JQGB01000009	1.48
	1777	JP74_04790	JQGB01000007	1.48
	1778	JP74_17805	JQGB01000034	1.48
	1779	JP74_20115	JQGB01000040	1.48
	1780	JP74_05040	JQGB01000009	1.48
	1781	JP74_21020	JQGB01000047	1.48
	1782	JP74_01150	JQGB01000002	1.48
	1783	JP74_02725	JQGB01000003	1.48
	1784	JP74_08745	JQGB01000014	1.48
	1785	JP74_09050	JQGB01000015	1.47
	1786	JP74_02715	JQGB01000003	1.47
	1787	JP74_05140	JQGB01000009	1.47
	1788	JP74_22195	JQGB01000053	1.47
	1789	JP74_12795	JQGB01000021	1.47
	1790	JP74_17160	JQGB01000030	1.47
	1791	hemH	JQGB01000026	1.47
	1792	JP74_06030	JQGB01000010	1.47
	1793	JP74_16110	JQGB01000027	1.47
	1794	JP74_02370	JQGB01000002	1.47
	1795	JP74_15945	JQGB01000027	1.47
	1796	JP74_02860	JQGB01000003	1.47
	1797	JP74_19160	JQGB01000036	1.47
	1798	JP74_08990	JQGB01000015	1.47
	1799	JP74_03510	JQGB01000004	1.47
	1800	JP74_04715	JQGB01000007	1.47
	1801	JP74_13260	JQGB01000022	1.47
	1802	JP74_04595	JQGB01000006	1.47
	1803	JP74_09315	JQGB01000015	1.47
	1804	JP74_08530	JQGB01000014	1.47
	1805	JP74_16940	JQGB01000029	1.47
	1806	JP74_06125	JQGB01000010	1.47
	1807	JP74_18745	JQGB01000035	1.47
	1808	JP74_06665	JQGB01000011	1.47
	1809	JP74_03765	JQGB01000004	1.47
	1810	JP74_09755	JQGB01000015	1.47
	1811	JP74_19875	JQGB01000040	1.47
	1812	JP74_09730	JQGB01000015	1.47
	1813	JP74_22565	JQGB01000059	1.47
	1814	JP74_03780	JQGB01000004	1.47
	1815	JP74_19850	JQGB01000040	1.47
	1816	JP74_16565	JQGB01000028	1.47
	1817	JP74_04785	JQGB01000007	1.47
	1818	JP74_09300	JQGB01000015	1.47
	1819	JP74_11540	JQGB01000020	1.47
	1820	JP74_11935	JQGB01000020	1.47
	1821	JP74_15830	JQGB01000027	1.47
	1822	JP74_16560	JQGB01000027	1.47
	1823	lldD	JQGB01000038	1.47
	1824	JP74_12515	JQGB01000021	1.47
	1825	JP74_19405	JQGB01000036	1.47
	1826	JP74_21760	JQGB01000050	1.47
	1827	JP74_22000	JQGB01000052	1.47
	1828	JP74_06695	JQGB01000011	1.47
	1829	JP74_12965	JQGB01000021	1.47
	1830	JP74_19420	JQGB01000036	1.47
	1831	JP74_07420	JQGB01000012	1.47
	1832	JP74_05505	JQGB01000009	1.47
	1833	JP74_14570	JQGB01000024	1.47
	1834	JP74_17735	JQGB01000034	1.47
	1835	JP74_20120	JQGB01000041	1.47
	1836	JP74_20180	JQGB01000041	1.47
	1837	JP74_00200	JQGB01000001	1.46
	1838	JP74_19575	JQGB01000038	1.46
	1839	JP74_17220	JQGB01000031	1.46
	1840	JP74_21335	JQGB01000048	1.46
	1841	JP74_10185	JQGB01000016	1.46
	1842	JP74_12160	JQGB01000021	1.46
	1843	JP74_11985	JQGB01000020	1.46
	1844	JP74_06495	JQGB01000010	1.46
	1845	JP74_10800	JQGB01000018	1.46
	1846	JP74_01330	JQGB01000002	1.46
	1847	JP74_05080	JQGB01000009	1.46
	1848	JP74_11160	JQGB01000019	1.46
	1849	JP74_17120	JQGB01000030	1.46
	1850	JP74_20325	JQGB01000043	1.46
	1851	JP74_00050	JQGB01000001	1.46
	1852	JP74_17525	JQGB01000033	1.46
	1853	JP74_11995	JQGB01000020	1.46
	1854	JP74_13265	JQGB01000022	1.46
	1855	JP74_15275	JQGB01000026	1.46
	1856	JP74_01080	JQGB01000002	1.46
	1857	JP74_05575	JQGB01000009	1.46
	1858	JP74_07130	JQGB01000012	1.46
	1859	JP74_08845	JQGB01000014	1.46
	1860	JP74_21495	JQGB01000049	1.46
	1861	JP74_21750	JQGB01000050	1.46
	1862	JP74_17510	JQGB01000033	1.46
	1863	JP74_11975	JQGB01000020	1.46
	1864	JP74_15070	JQGB01000025	1.46
	1865	JP74_19950	JQGB01000040	1.46
	1866	JP74_06155	JQGB01000010	1.46
	1867	JP74_09185	JQGB01000015	1.46
	1868	JP74_07305	JQGB01000012	1.46
	1869	JP74_03970	JQGB01000005	1.46
	1870	JP74_09660	JQGB01000015	1.46
	1871	JP74_10785	JQGB01000018	1.46
	1872	JP74_08200	JQGB01000012	1.45
	1873	JP74_17305	JQGB01000031	1.45
	1874	JP74_08555	JQGB01000014	1.45
	1875	JP74_16735	JQGB01000029	1.45
	1876	JP74_21340	JQGB01000048	1.45
	1877	JP74_20095	JQGB01000040	1.45
	1878	JP74_10115	JQGB01000016	1.45
	1879	JP74_16405	JQGB01000027	1.45
	1880	JP74_20200	JQGB01000041	1.45
	1881	JP74_17630	JQGB01000033	1.45
	1882	JP74_11930	JQGB01000020	1.45
	1883	JP74_00390	JQGB01000001	1.45
	1884	JP74_17645	JQGB01000034	1.45
	1885	JP74_12410	JQGB01000021	1.45
	1886	JP74_18085	JQGB01000034	1.45
	1887	JP74_04295	JQGB01000006	1.45
	1888	JP74_12360	JQGB01000021	1.45
	1889	JP74_15785	JQGB01000027	1.45
	1890	JP74_16955	JQGB01000029	1.45
	1891	JP74_22125	JQGB01000052	1.45
	1892	JP74_01220	JQGB01000002	1.45
	1893	JP74_01265	JQGB01000002	1.45
	1894	JP74_02090	JQGB01000002	1.45
	1895	JP74_07045	JQGB01000012	1.45
	1896	JP74_08170	JQGB01000012	1.45
	1897	JP74_08350	JQGB01000013	1.45
	1898	JP74_08805	JQGB01000014	1.45
	1899	JP74_10350	JQGB01000017	1.45
	1900	JP74_11640	JQGB01000020	1.45
	1901	JP74_13610	JQGB01000022	1.45
	1902	JP74_16525	JQGB01000027	1.45
	1903	JP74_17615	JQGB01000033	1.45
	1904	JP74_17815	JQGB01000034	1.45
	1905	JP74_21240	JQGB01000047	1.45
	1906	JP74_21385	JQGB01000048	1.45
	1907	JP74_22065	JQGB01000052	1.45
	1908	JP74_15100	JQGB01000026	1.45
	1909	JP74_18500	JQGB01000035	1.45
	1910	gapA	JQGB01000026	1.45
	1911	JP74_08600	JQGB01000014	1.45
	1912	JP74_04115	JQGB01000006	1.45
	1913	JP74_06520	JQGB01000010	1.45
	1914	JP74_20380	JQGB01000043	1.45
	1915	JP74_16865	JQGB01000029	1.45
	1916	JP74_04405	JQGB01000006	1.45
	1917	JP74_03650	JQGB01000004	1.45
	1918	JP74_04105	JQGB01000006	1.44
	1919	JP74_07650	JQGB01000012	1.44
	1920	JP74_20635	JQGB01000045	1.44
	1921	JP74_21325	JQGB01000048	1.44
	1922	JP74_00540	JQGB01000001	1.44
	1923	JP74_12705	JQGB01000021	1.44
	1924	JP74_06175	JQGB01000010	1.44
	1925	JP74_04050	JQGB01000005	1.44
	1926	JP74_12430	JQGB01000021	1.44
	1927	JP74_13850	JQGB01000022	1.44
	1928	JP74_20015	JQGB01000040	1.44
	1929	dppD (JQGB01000012 28454..29486)	JQGB01000012	1.44
	1930	JP74_02760	JQGB01000003	1.44
	1931	JP74_06470	JQGB01000010	1.44
	1932	JP74_13685	JQGB01000022	1.44
	1933	JP74_17205	JQGB01000031	1.44
	1934	JP74_17300	JQGB01000031	1.44
	1935	JP74_06835	JQGB01000011	1.44
	1936	JP74_01335	JQGB01000002	1.44
	1937	JP74_11245	JQGB01000020	1.44
	1938	JP74_13905	JQGB01000022	1.44
	1939	JP74_16780	JQGB01000029	1.44
	1940	JP74_19550	JQGB01000037	1.44
	1941	JP74_03905	JQGB01000005	1.44
	1942	JP74_07300	JQGB01000012	1.44
	1943	JP74_10860	JQGB01000018	1.44
	1944	JP74_15660	JQGB01000027	1.44
	1945	JP74_17975	JQGB01000034	1.44
	1946	JP74_22905	JQGB01000069	1.44
	1947	JP74_22920	JQGB01000070	1.44
	1948	JP74_11530	JQGB01000020	1.44
	1949	JP74_15835	JQGB01000027	1.44
	1950	JP74_01945	JQGB01000002	1.44
	1951	JP74_09165	JQGB01000015	1.44
	1952	JP74_19015	JQGB01000036	1.44
	1953	JP74_21665	JQGB01000049	1.44
	1954	JP74_23115	JQGB01000080	1.44
	1955	JP74_02520	JQGB01000002	1.44
	1956	JP74_09335	JQGB01000015	1.44
	1957	JP74_16210	JQGB01000027	1.44
	1958	JP74_12595	JQGB01000021	1.44
	1959	JP74_11990	JQGB01000020	1.44
	1960	JP74_16290	JQGB01000027	1.44
	1961	JP74_15565	JQGB01000026	1.44
	1962	JP74_18275	JQGB01000034	1.44
	1963	JP74_18990	JQGB01000036	1.44
	1964	JP74_19815	JQGB01000038	1.44
	1965	JP74_10175	JQGB01000016	1.44
	1966	JP74_22440	JQGB01000055	1.44
	1967	JP74_15055	JQGB01000025	1.44
	1968	JP74_00735	JQGB01000002	1.43
	1969	JP74_18205	JQGB01000034	1.43
	1970	JP74_20385	JQGB01000043	1.43
	1971	JP74_22260	JQGB01000054	1.43
	1972	JP74_05660	JQGB01000009	1.43
	1973	JP74_10990	JQGB01000018	1.43
	1974	JP74_17555	JQGB01000033	1.43
	1975	JP74_17765	JQGB01000034	1.43
	1976	JP74_18675	JQGB01000035	1.43
	1977	JP74_20600	JQGB01000045	1.43
	1978	JP74_21655	JQGB01000049	1.43
	1979	JP74_13015	JQGB01000021	1.43
	1980	JP74_05065	JQGB01000009	1.43
	1981	JP74_20965	JQGB01000047	1.43
	1982	JP74_10405	JQGB01000017	1.43
	1983	JP74_08775	JQGB01000014	1.43
	1984	JP74_10965	JQGB01000018	1.43
	1985	JP74_15805	JQGB01000027	1.43
	1986	JP74_06610	JQGB01000011	1.43
	1987	JP74_13680	JQGB01000022	1.43
	1988	JP74_06930	JQGB01000011	1.43
	1989	JP74_05060	JQGB01000009	1.43
	1990	JP74_09725	JQGB01000015	1.43
	1991	JP74_02150	JQGB01000002	1.43
	1992	JP74_08835	JQGB01000014	1.43
	1993	JP74_09450	JQGB01000015	1.43
	1994	JP74_12985	JQGB01000021	1.43
	1995	JP74_13520	JQGB01000022	1.43
	1996	JP74_12875	JQGB01000021	1.43
	1997	JP74_07800	JQGB01000012	1.43
	1998	JP74_14390	JQGB01000024	1.43
[truncated: 2,014 more rows]

## Sheet: Con. Vs. DON (5h)
	RNA transcripts that have changed due to deoxynivalenol (50 ug/mL) inclusion in Devosia mutans 17-2-E-8 growth media (5 hour).
	#	Transcript	Chromosome	Fold Change
	1	JP74_01380	JQGB01000002	∞
	2	JP74_01440	JQGB01000002	∞
	3	JP74_09070	JQGB01000015	∞
	4	JP74_09365	JQGB01000015	∞
	5	JP74_11900	JQGB01000020	∞
	6	JP74_15035	JQGB01000025	∞
	7	JP74_15975	JQGB01000027	∞
	8	JP74_18215	JQGB01000034	∞
	9	JP74_21090	JQGB01000047	∞
	10	JP74_21350	JQGB01000048	∞
	11	JP74_21985	JQGB01000052	∞
	12	JP74_23460	JQGB01000113	∞
	13	JP74_18865	JQGB01000035	15.25
	14	JP74_19940	JQGB01000040	14.42
	15	JP74_15915	JQGB01000027	13.78
	16	JP74_21945	JQGB01000052	12.36
	17	JP74_09595	JQGB01000015	11.33
	18	JP74_20250	JQGB01000041	9.58
	19	JP74_21935	JQGB01000052	9.27
	20	JP74_20245	JQGB01000041	8.75
	21	JP74_23295	JQGB01000093	8.41
	22	JP74_14225	JQGB01000023	7.9
	23	JP74_12615	JQGB01000021	7.65
	24	JP74_21880	JQGB01000050	7.21
	25	JP74_05685	JQGB01000009	7.01
	26	JP74_10055	JQGB01000016	6.87
	27	JP74_19085	JQGB01000036	6.53
	28	JP74_16240	JQGB01000027	6.53
	29	JP74_22385	JQGB01000055	6.53
	30	JP74_16245	JQGB01000027	6.23
	31	JP74_03395	JQGB01000004	6.18
	32	JP74_06575	JQGB01000010	6.18
	33	JP74_16255	JQGB01000027	6.13
	34	JP74_09965	JQGB01000016	5.67
	35	JP74_22355	JQGB01000054	5.67
	36	JP74_04960	JQGB01000009	5.49
	37	JP74_22435	JQGB01000055	5.49
	38	JP74_16260	JQGB01000027	5.46
	39	JP74_22495	JQGB01000056	5.28
	40	JP74_02695	JQGB01000003	5.15
	41	JP74_03245	JQGB01000004	5.15
	42	JP74_21045	JQGB01000047	5.15
	43	JP74_03255	JQGB01000004	5.03
	44	JP74_20775	JQGB01000045	4.98
	45	JP74_11650	JQGB01000020	4.95
	46	JP74_05095	JQGB01000009	4.91
	47	JP74_16785	JQGB01000029	4.89
	48	JP74_01470	JQGB01000002	4.88
	49	tdh	JQGB01000005	4.79
	50	JP74_14850	JQGB01000025	4.76
	51	JP74_05880	JQGB01000009	4.74
	52	JP74_07830	JQGB01000012	4.74
	53	JP74_16575	JQGB01000028	4.74
	54	JP74_13875	JQGB01000022	4.73
	55	JP74_07920	JQGB01000012	4.67
	56	JP74_18965	JQGB01000036	4.65
	57	JP74_19000	JQGB01000036	4.64
	58	JP74_21300	JQGB01000048	4.64
	59	JP74_22350	JQGB01000054	4.64
	60	JP74_12605	JQGB01000021	4.59
	61	JP74_07935	JQGB01000012	4.58
	62	JP74_16765	JQGB01000029	4.52
	63	JP74_12045	JQGB01000020	4.46
	64	JP74_21630	JQGB01000049	4.46
	65	JP74_17320	JQGB01000032	4.42
	66	JP74_20580	JQGB01000045	4.4
	67	JP74_06865	JQGB01000011	4.35
	68	JP74_05215	JQGB01000009	4.33
	69	JP74_10215	JQGB01000016	4.31
	70	JP74_16745	JQGB01000029	4.29
	71	JP74_16250	JQGB01000027	4.28
	72	JP74_20155	JQGB01000041	4.25
	73	JP74_15220	JQGB01000026	4.21
	74	JP74_08260	JQGB01000013	4.19
	75	JP74_18935	JQGB01000036	4.17
	76	JP74_10080	JQGB01000016	4.17
	77	JP74_05100	JQGB01000009	4.16
	78	JP74_05940	JQGB01000009	4.12
	79	JP74_11585	JQGB01000020	4.12
	80	JP74_13775	JQGB01000022	4.12
	81	JP74_14325	JQGB01000024	4.12
	82	JP74_15595	JQGB01000027	4.12
	83	JP74_19450	JQGB01000037	4.12
	84	JP74_21080	JQGB01000047	4.12
	85	JP74_22015	JQGB01000052	4.12
	86	JP74_06425	JQGB01000010	4.12
	87	JP74_16850	JQGB01000029	4.12
	88	JP74_19600	JQGB01000038	4.12
	89	JP74_21430	JQGB01000049	4.12
	90	JP74_12385	JQGB01000021	4.11
	91	JP74_05670	JQGB01000009	4.1
	92	JP74_02545	JQGB01000002	4.09
	93	JP74_21725	JQGB01000050	4.07
	94	JP74_02975	JQGB01000004	4.05
	95	JP74_05935	JQGB01000009	4.01
	96	JP74_03410	JQGB01000004	4
	97	JP74_21030	JQGB01000047	4
	98	JP74_07645	JQGB01000012	3.98
	99	JP74_06815	JQGB01000011	3.98
	100	JP74_05830	JQGB01000009	3.97
	101	JP74_03700	JQGB01000004	3.96
	102	JP74_20290	JQGB01000042	3.95
	103	JP74_17605	JQGB01000033	3.94
	104	JP74_21055	JQGB01000047	3.94
	105	JP74_08585	JQGB01000014	3.92
	106	JP74_22150	JQGB01000052	3.92
	107	JP74_11190	JQGB01000019	3.9
	108	JP74_17445	JQGB01000033	3.88
	109	JP74_08010	JQGB01000012	3.88
	110	JP74_14715	JQGB01000025	3.88
	111	JP74_09830	JQGB01000015	3.88
	112	JP74_20835	JQGB01000046	3.88
	113	JP74_12570	JQGB01000021	3.86
	114	JP74_16760	JQGB01000029	3.86
	115	JP74_19520	JQGB01000037	3.86
	116	JP74_22315	JQGB01000054	3.86
	117	JP74_18075	JQGB01000034	3.86
	118	JP74_19130	JQGB01000036	3.86
	119	JP74_01395	JQGB01000002	3.84
	120	JP74_02925	JQGB01000004	3.83
	121	JP74_10300	JQGB01000017	3.83
	122	JP74_11240	JQGB01000020	3.83
	123	JP74_08695	JQGB01000014	3.81
	124	JP74_06995	JQGB01000012	3.79
	125	JP74_15260	JQGB01000026	3.78
	126	JP74_20605	JQGB01000045	3.78
	127	JP74_22840	JQGB01000067	3.77
	128	JP74_05870	JQGB01000009	3.76
	129	JP74_12230	JQGB01000021	3.75
	130	JP74_22190	JQGB01000053	3.75
	131	JP74_19580	JQGB01000038	3.75
	132	JP74_12310	JQGB01000021	3.75
	133	JP74_17775	JQGB01000034	3.72
	134	JP74_02570	JQGB01000002	3.72
	135	JP74_03065	JQGB01000004	3.71
	136	JP74_12590	JQGB01000021	3.71
	137	JP74_02330	JQGB01000002	3.71
	138	JP74_05815	JQGB01000009	3.71
	139	JP74_19080	JQGB01000036	3.7
	140	JP74_19170	JQGB01000036	3.7
	141	JP74_05630	JQGB01000009	3.69
	142	JP74_20685	JQGB01000045	3.69
	143	JP74_22155	JQGB01000052	3.69
	144	JP74_20830	JQGB01000046	3.68
	145	JP74_02540	JQGB01000002	3.68
	146	JP74_16790	JQGB01000029	3.67
	147	ispG	JQGB01000036	3.67
	148	JP74_17750	JQGB01000034	3.65
	149	JP74_19490	JQGB01000037	3.64
	150	JP74_05980	JQGB01000009	3.64
	151	JP74_21805	JQGB01000050	3.64
	152	JP74_16750	JQGB01000029	3.64
	153	JP74_05240	JQGB01000009	3.64
	154	JP74_05920	JQGB01000009	3.63
	155	JP74_02845	JQGB01000003	3.63
	156	JP74_20840	JQGB01000046	3.62
	157	JP74_22940	JQGB01000072	3.62
	158	JP74_14040	JQGB01000022	3.61
	159	JP74_06630	JQGB01000011	3.61
	160	JP74_16915	JQGB01000029	3.61
	161	JP74_17395	JQGB01000033	3.61
	162	JP74_19235	JQGB01000036	3.61
	163	JP74_21270	JQGB01000048	3.61
	164	JP74_16780	JQGB01000029	3.58
	165	JP74_12580	JQGB01000021	3.58
	166	JP74_22275	JQGB01000054	3.58
	167	JP74_05380	JQGB01000009	3.57
	168	JP74_12575	JQGB01000021	3.57
	169	JP74_18210	JQGB01000034	3.57
	170	JP74_23040	JQGB01000076	3.57
	171	JP74_16685	JQGB01000029	3.56
	172	JP74_21415	JQGB01000049	3.56
	173	JP74_19545	JQGB01000037	3.56
	174	JP74_17580	JQGB01000033	3.56
	175	JP74_17595	JQGB01000033	3.55
	176	JP74_05205	JQGB01000009	3.55
	177	JP74_18980	JQGB01000036	3.54
	178	JP74_11985	JQGB01000020	3.54
	179	JP74_16055	JQGB01000027	3.54
	180	JP74_04995	JQGB01000009	3.54
	181	JP74_05975	JQGB01000009	3.54
	182	JP74_05810	JQGB01000009	3.53
	183	JP74_05195	JQGB01000009	3.53
	184	JP74_14160	JQGB01000023	3.53
	185	JP74_12700	JQGB01000021	3.53
	186	JP74_08710	JQGB01000014	3.52
	187	JP74_08785	JQGB01000014	3.52
	188	JP74_08180	JQGB01000012	3.52
	189	JP74_09280	JQGB01000015	3.52
	190	JP74_17410	JQGB01000033	3.51
	191	JP74_23045	JQGB01000076	3.51
	192	JP74_15515	JQGB01000026	3.5
	193	JP74_12450	JQGB01000021	3.5
	194	JP74_17785	JQGB01000034	3.49
	195	JP74_02625	JQGB01000003	3.48
	196	JP74_04525	JQGB01000006	3.48
	197	JP74_00690	JQGB01000001	3.48
	198	JP74_05120	JQGB01000009	3.47
	199	JP74_12485	JQGB01000021	3.46
	200	JP74_06225	JQGB01000010	3.46
	201	JP74_19390	JQGB01000036	3.44
	202	JP74_04010	JQGB01000005	3.43
	203	JP74_14455	JQGB01000024	3.43
	204	JP74_20255	JQGB01000041	3.43
	205	JP74_15970	JQGB01000027	3.43
	206	JP74_07910	JQGB01000012	3.43
	207	JP74_05655	JQGB01000009	3.43
	208	JP74_21610	JQGB01000049	3.42
	209	JP74_08015	JQGB01000012	3.41
	210	JP74_22345	JQGB01000054	3.41
	211	JP74_19680	JQGB01000038	3.41
	212	JP74_09865	JQGB01000015	3.41
	213	JP74_18455	JQGB01000035	3.41
	214	JP74_10130	JQGB01000016	3.4
	215	JP74_23125	JQGB01000081	3.4
	216	JP74_19135	JQGB01000036	3.4
	217	JP74_13025	JQGB01000021	3.4
	218	JP74_21875	JQGB01000050	3.4
	219	JP74_05800	JQGB01000009	3.39
	220	JP74_03930	JQGB01000005	3.39
	221	JP74_16770	JQGB01000029	3.39
	222	JP74_10125	JQGB01000016	3.38
	223	JP74_18995	JQGB01000036	3.38
	224	JP74_07810	JQGB01000012	3.37
	225	JP74_14120	JQGB01000023	3.36
	226	JP74_14770	JQGB01000025	3.36
	227	JP74_05840	JQGB01000009	3.36
	228	JP74_01410	JQGB01000002	3.35
	229	JP74_04165	JQGB01000006	3.35
	230	JP74_04970	JQGB01000009	3.35
	231	JP74_13055	JQGB01000021	3.35
	232	JP74_17035	JQGB01000029	3.35
	233	JP74_16265	JQGB01000027	3.34
	234	JP74_21500	JQGB01000049	3.34
	235	JP74_22210	JQGB01000054	3.34
	236	JP74_17120	JQGB01000030	3.33
	237	JP74_22975	JQGB01000072	3.33
	238	JP74_05345	JQGB01000009	3.33
	239	JP74_14985	JQGB01000025	3.33
	240	JP74_19430	JQGB01000036	3.33
	241	JP74_14870	JQGB01000025	3.33
	242	JP74_05535	JQGB01000009	3.33
	243	oppD (JQGB01000026 24352..25342)	JQGB01000026	3.32
	244	JP74_15550	JQGB01000026	3.31
	245	JP74_20795	JQGB01000045	3.31
	246	JP74_05540	JQGB01000009	3.3
	247	JP74_23250	JQGB01000091	3.3
	248	JP74_01475	JQGB01000002	3.3
	249	JP74_09460	JQGB01000015	3.3
	250	JP74_10820	JQGB01000018	3.3
	251	JP74_02550	JQGB01000002	3.29
	252	JP74_17530	JQGB01000033	3.29
	253	rocD	JQGB01000038	3.29
	254	JP74_21605	JQGB01000049	3.28
	255	JP74_12315	JQGB01000021	3.28
	256	JP74_03240	JQGB01000004	3.27
	257	JP74_19205	JQGB01000036	3.27
	258	JP74_23260	JQGB01000091	3.27
	259	JP74_01045	JQGB01000002	3.27
	260	JP74_14100	JQGB01000023	3.27
	261	JP74_03130	JQGB01000004	3.26
	262	JP74_20780	JQGB01000045	3.26
	263	JP74_06240	JQGB01000010	3.26
	264	JP74_18540	JQGB01000035	3.26
	265	JP74_04125	JQGB01000006	3.26
	266	JP74_12705	JQGB01000021	3.25
	267	JP74_17540	JQGB01000033	3.25
	268	JP74_19355	JQGB01000036	3.25
	269	JP74_05595	JQGB01000009	3.24
	270	JP74_19495	JQGB01000037	3.24
	271	JP74_07265	JQGB01000012	3.24
	272	JP74_02110	JQGB01000002	3.24
	273	JP74_12500	JQGB01000021	3.24
	274	JP74_00230	JQGB01000001	3.24
	275	JP74_01890	JQGB01000002	3.24
	276	JP74_10735	JQGB01000018	3.24
	277	JP74_05565	JQGB01000009	3.24
	278	JP74_19630	JQGB01000038	3.23
	279	JP74_17990	JQGB01000034	3.23
	280	JP74_09850	JQGB01000015	3.23
	281	JP74_00365	JQGB01000001	3.23
	282	JP74_00025	JQGB01000001	3.23
	283	JP74_03390	JQGB01000004	3.23
	284	JP74_19700	JQGB01000038	3.23
	285	JP74_06190	JQGB01000010	3.23
	286	JP74_20660	JQGB01000045	3.23
	287	JP74_14890	JQGB01000025	3.23
	288	JP74_12565	JQGB01000021	3.23
	289	JP74_10990	JQGB01000018	3.22
	290	JP74_21575	JQGB01000049	3.22
	291	JP74_14115	JQGB01000023	3.22
	292	JP74_12660	JQGB01000021	3.22
	293	JP74_22600	JQGB01000060	3.22
	294	JP74_17025	JQGB01000029	3.22
	295	JP74_15470	JQGB01000026	3.21
	296	JP74_17340	JQGB01000033	3.21
	297	JP74_08435	JQGB01000013	3.21
	298	JP74_16960	JQGB01000029	3.21
	299	JP74_06650	JQGB01000011	3.21
	300	JP74_04515	JQGB01000006	3.21
	301	JP74_20670	JQGB01000045	3.21
	302	JP74_03590	JQGB01000004	3.21
	303	JP74_20625	JQGB01000045	3.21
	304	JP74_02520	JQGB01000002	3.21
	305	JP74_08315	JQGB01000013	3.2
	306	JP74_07220	JQGB01000012	3.2
	307	JP74_12685	JQGB01000021	3.19
	308	JP74_07520	JQGB01000012	3.19
	309	JP74_12350	JQGB01000021	3.19
	310	JP74_04990	JQGB01000009	3.18
	311	JP74_14915	JQGB01000025	3.18
	312	JP74_19730	JQGB01000038	3.18
	313	JP74_21730	JQGB01000050	3.18
	314	JP74_10385	JQGB01000017	3.18
	315	JP74_15045	JQGB01000025	3.18
	316	JP74_15465	JQGB01000026	3.18
	317	JP74_14500	JQGB01000024	3.18
	318	JP74_20435	JQGB01000043	3.18
	319	JP74_14575	JQGB01000024	3.18
	320	JP74_19180	JQGB01000036	3.18
	321	JP74_21930	JQGB01000052	3.17
	322	JP74_08035	JQGB01000012	3.17
	323	JP74_12320	JQGB01000021	3.17
	324	JP74_01870	JQGB01000002	3.16
	325	JP74_22850	JQGB01000067	3.16
	326	JP74_14235	JQGB01000023	3.15
	327	JP74_19500	JQGB01000037	3.15
	328	JP74_03730	JQGB01000004	3.15
	329	JP74_05635	JQGB01000009	3.15
	330	JP74_11660	JQGB01000020	3.14
	331	JP74_15700	JQGB01000027	3.14
	332	JP74_22160	JQGB01000052	3.14
	333	JP74_21435	JQGB01000049	3.14
	334	JP74_03115	JQGB01000004	3.14
	335	JP74_05600	JQGB01000009	3.14
	336	JP74_03235	JQGB01000004	3.14
	337	JP74_09880	JQGB01000015	3.14
	338	JP74_16100	JQGB01000027	3.14
	339	JP74_00740	JQGB01000002	3.14
	340	JP74_17550	JQGB01000033	3.14
	341	JP74_01815	JQGB01000002	3.13
	342	JP74_14825	JQGB01000025	3.13
	343	JP74_01270	JQGB01000002	3.13
	344	JP74_18605	JQGB01000035	3.13
	345	JP74_21490	JQGB01000049	3.13
	346	JP74_03695	JQGB01000004	3.12
	347	JP74_22195	JQGB01000053	3.12
	348	JP74_00115	JQGB01000001	3.12
	349	JP74_12480	JQGB01000021	3.12
	350	JP74_05570	JQGB01000009	3.11
	351	JP74_01200	JQGB01000002	3.09
	352	JP74_05560	JQGB01000009	3.09
	353	JP74_01245	JQGB01000002	3.09
	354	JP74_03835	JQGB01000005	3.09
	355	JP74_04985	JQGB01000009	3.09
	356	JP74_07060	JQGB01000012	3.09
	357	JP74_08775	JQGB01000014	3.09
	358	JP74_09560	JQGB01000015	3.09
	359	JP74_09740	JQGB01000015	3.09
	360	JP74_09855	JQGB01000015	3.09
	361	JP74_10030	JQGB01000016	3.09
	362	JP74_10195	JQGB01000016	3.09
	363	JP74_10605	JQGB01000018	3.09
	364	JP74_12065	JQGB01000020	3.09
	365	JP74_12770	JQGB01000021	3.09
	366	JP74_14015	JQGB01000022	3.09
	367	JP74_15210	JQGB01000026	3.09
	368	JP74_15845	JQGB01000027	3.09
	369	JP74_16900	JQGB01000029	3.09
	370	JP74_17495	JQGB01000033	3.09
	371	JP74_18855	JQGB01000035	3.09
	372	JP74_18925	JQGB01000036	3.09
	373	JP74_20595	JQGB01000045	3.09
	374	JP74_21345	JQGB01000048	3.09
	375	JP74_21360	JQGB01000048	3.09
	376	JP74_01975	JQGB01000002	3.09
	377	JP74_04505	JQGB01000006	3.09
	378	JP74_07270	JQGB01000012	3.09
	379	JP74_12305	JQGB01000021	3.09
	380	JP74_16630	JQGB01000028	3.09
	381	JP74_19055	JQGB01000036	3.09
	382	JP74_20145	JQGB01000041	3.09
	383	JP74_14470	JQGB01000024	3.08
	384	JP74_08765	JQGB01000014	3.08
	385	JP74_10355	JQGB01000017	3.07
	386	JP74_15040	JQGB01000025	3.07
	387	JP74_10050	JQGB01000016	3.07
	388	JP74_20165	JQGB01000041	3.07
	389	JP74_22960	JQGB01000072	3.07
	390	JP74_22480	JQGB01000056	3.07
	391	JP74_08945	JQGB01000014	3.06
	392	JP74_14995	JQGB01000025	3.06
	393	JP74_06925	JQGB01000011	3.05
	394	JP74_15145	JQGB01000026	3.05
	395	JP74_12625	JQGB01000021	3.05
	396	JP74_07545	JQGB01000012	3.05
	397	JP74_05785	JQGB01000009	3.05
	398	JP74_20565	JQGB01000045	3.05
	399	JP74_18955	JQGB01000036	3.05
	400	JP74_16965	JQGB01000029	3.05
	401	JP74_22040	JQGB01000052	3.04
	402	JP74_19625	JQGB01000038	3.04
	403	JP74_04330	JQGB01000006	3.04
	404	JP74_11365	JQGB01000020	3.04
	405	JP74_04215	JQGB01000006	3.04
	406	JP74_02440	JQGB01000002	3.04
	407	JP74_02285	JQGB01000002	3.04
	408	JP74_05620	JQGB01000009	3.04
	409	JP74_12595	JQGB01000021	3.04
	410	JP74_17865	JQGB01000034	3.04
	411	JP74_09400	JQGB01000015	3.04
	412	JP74_03900	JQGB01000005	3.03
	413	JP74_17335	JQGB01000033	3.03
	414	JP74_02810	JQGB01000003	3.03
	415	JP74_09875	JQGB01000015	3.02
	416	JP74_17675	JQGB01000034	3.02
	417	JP74_12665	JQGB01000021	3.02
	418	JP74_17515	JQGB01000033	3.02
	419	JP74_19665	JQGB01000038	3.02
	420	JP74_17840	JQGB01000034	3.01
	421	JP74_14540	JQGB01000024	3.01
	422	JP74_22595	JQGB01000060	3.01
	423	JP74_07850	JQGB01000012	3.01
	424	JP74_20675	JQGB01000045	3.01
	425	JP74_15455	JQGB01000026	3.01
	426	JP74_20790	JQGB01000045	3.01
	427	JP74_01885	JQGB01000002	3.01
	428	JP74_19870	JQGB01000040	3.01
	429	JP74_02475	JQGB01000002	3.01
	430	JP74_05610	JQGB01000009	3.01
	431	JP74_05835	JQGB01000009	3
	432	JP74_10015	JQGB01000016	3
	433	JP74_21750	JQGB01000050	3
	434	JP74_07370	JQGB01000012	2.99
	435	JP74_17710	JQGB01000034	2.99
	436	JP74_09360	JQGB01000015	2.99
	437	JP74_18860	JQGB01000035	2.99
	438	JP74_04860	JQGB01000008	2.99
	439	JP74_06110	JQGB01000010	2.99
	440	JP74_09765	JQGB01000015	2.99
	441	JP74_12680	JQGB01000021	2.98
	442	JP74_07260	JQGB01000012	2.98
	443	JP74_13140	JQGB01000022	2.98
	444	JP74_08265	JQGB01000013	2.98
	445	JP74_20140	JQGB01000041	2.98
	446	JP74_08780	JQGB01000014	2.98
	447	JP74_05400	JQGB01000009	2.97
	448	JP74_19650	JQGB01000038	2.97
	449	JP74_05925	JQGB01000009	2.97
	450	JP74_23255	JQGB01000091	2.97
	451	JP74_01425	JQGB01000002	2.97
	452	JP74_21635	JQGB01000049	2.97
	453	JP74_09205	JQGB01000015	2.97
	454	JP74_10090	JQGB01000016	2.97
	455	JP74_19825	JQGB01000039	2.97
	456	JP74_19070	JQGB01000036	2.96
	457	JP74_04265	JQGB01000006	2.96
	458	JP74_17610	JQGB01000033	2.96
	459	JP74_20350	JQGB01000043	2.96
	460	JP74_21520	JQGB01000049	2.96
	461	JP74_01350	JQGB01000002	2.96
	462	JP74_06095	JQGB01000010	2.96
	463	JP74_14305	JQGB01000024	2.96
	464	JP74_08810	JQGB01000014	2.96
	465	JP74_02850	JQGB01000003	2.96
	466	JP74_16945	JQGB01000029	2.95
	467	JP74_18600	JQGB01000035	2.95
	468	JP74_01875	JQGB01000002	2.95
	469	gabD (JQGB01000004 165925..167383)	JQGB01000004	2.95
	470	JP74_09845	JQGB01000015	2.95
	471	JP74_06700	JQGB01000011	2.95
	472	JP74_12975	JQGB01000021	2.95
	473	JP74_22060	JQGB01000052	2.95
	474	JP74_17510	JQGB01000033	2.95
	475	JP74_17400	JQGB01000033	2.95
	476	JP74_06570	JQGB01000010	2.95
	477	JP74_01925	JQGB01000002	2.95
	478	JP74_04620	JQGB01000006	2.95
	479	JP74_22965	JQGB01000072	2.95
	480	JP74_02410	JQGB01000002	2.94
	481	JP74_09710	JQGB01000015	2.94
	482	JP74_06235	JQGB01000010	2.94
	483	JP74_07530	JQGB01000012	2.94
	484	JP74_10965	JQGB01000018	2.94
	485	JP74_20865	JQGB01000047	2.94
	486	JP74_06505	JQGB01000010	2.94
	487	JP74_08285	JQGB01000013	2.94
	488	JP74_06730	JQGB01000011	2.94
	489	JP74_01400	JQGB01000002	2.93
	490	JP74_04050	JQGB01000005	2.93
	491	JP74_03665	JQGB01000004	2.93
	492	JP74_06430	JQGB01000010	2.93
	493	JP74_21995	JQGB01000052	2.93
	494	JP74_22250	JQGB01000054	2.93
	495	JP74_04380	JQGB01000006	2.93
	496	JP74_00880	JQGB01000002	2.93
	497	JP74_04320	JQGB01000006	2.93
	498	JP74_18285	JQGB01000034	2.93
	499	JP74_08950	JQGB01000014	2.93
	500	JP74_10460	JQGB01000018	2.93
	501	JP74_19230	JQGB01000036	2.92
	502	JP74_02645	JQGB01000003	2.92
	503	JP74_22860	JQGB01000067	2.92
	504	JP74_12415	JQGB01000021	2.92
	505	JP74_13330	JQGB01000022	2.92
	506	JP74_15840	JQGB01000027	2.92
	507	JP74_00725	JQGB01000002	2.92
	508	JP74_02710	JQGB01000003	2.92
	509	JP74_11205	JQGB01000019	2.92
	510	JP74_12600	JQGB01000021	2.92
	511	JP74_15560	JQGB01000026	2.92
	512	JP74_19385	JQGB01000036	2.92
	513	hppA	JQGB01000037	2.92
	514	JP74_15265	JQGB01000026	2.92
	515	JP74_20185	JQGB01000041	2.91
	516	JP74_08595	JQGB01000014	2.91
	517	JP74_06740	JQGB01000011	2.91
	518	JP74_12640	JQGB01000021	2.91
	519	JP74_04020	JQGB01000005	2.91
	520	JP74_07020	JQGB01000012	2.91
	521	JP74_12495	JQGB01000021	2.9
	522	JP74_00815	JQGB01000002	2.9
	523	JP74_05945	JQGB01000009	2.9
	524	JP74_20065	JQGB01000040	2.9
	525	JP74_17845	JQGB01000034	2.9
	526	JP74_12475	JQGB01000021	2.9
	527	JP74_14700	JQGB01000025	2.9
	528	JP74_18970	JQGB01000036	2.9
	529	JP74_08615	JQGB01000014	2.9
	530	JP74_09720	JQGB01000015	2.9
	531	JP74_12125	JQGB01000021	2.9
	532	JP74_19360	JQGB01000036	2.9
	533	JP74_05985	JQGB01000009	2.89
	534	JP74_12285	JQGB01000021	2.89
	535	JP74_12470	JQGB01000021	2.89
	536	JP74_16595	JQGB01000028	2.89
	537	JP74_04835	JQGB01000008	2.88
	538	JP74_08115	JQGB01000012	2.88
	539	JP74_09270	JQGB01000015	2.88
	540	JP74_05605	JQGB01000009	2.88
	541	JP74_06910	JQGB01000011	2.88
	542	JP74_17940	JQGB01000034	2.88
	543	JP74_09150	JQGB01000015	2.88
	544	JP74_22050	JQGB01000052	2.88
	545	JP74_12795	JQGB01000021	2.88
	546	JP74_12225	JQGB01000021	2.88
	547	JP74_13220	JQGB01000022	2.88
	548	JP74_15065	JQGB01000025	2.88
	549	phnK (JQGB01000012 10518..11295)	JQGB01000012	2.88
	550	JP74_14865	JQGB01000025	2.88
	551	JP74_09260	JQGB01000015	2.88
	552	JP74_05545	JQGB01000009	2.88
	553	JP74_06920	JQGB01000011	2.88
	554	JP74_01805	JQGB01000002	2.87
	555	JP74_17005	JQGB01000029	2.87
	556	JP74_12425	JQGB01000021	2.87
	557	JP74_12155	JQGB01000021	2.87
	558	JP74_19075	JQGB01000036	2.87
	559	JP74_11195	JQGB01000019	2.87
	560	JP74_16270	JQGB01000027	2.87
	561	JP74_08020	JQGB01000012	2.87
	562	JP74_09795	JQGB01000015	2.87
	563	JP74_18255	JQGB01000034	2.87
	564	JP74_22220	JQGB01000054	2.87
	565	JP74_00590	JQGB01000001	2.87
	566	JP74_16275	JQGB01000027	2.87
	567	JP74_04975	JQGB01000009	2.87
	568	JP74_11475	JQGB01000020	2.87
	569	JP74_19785	JQGB01000038	2.87
	570	JP74_02560	JQGB01000002	2.86
	571	JP74_21975	JQGB01000052	2.86
	572	JP74_02795	JQGB01000003	2.86
	573	JP74_19420	JQGB01000036	2.86
	574	JP74_12355	JQGB01000021	2.86
	575	JP74_17770	JQGB01000034	2.86
	576	JP74_19705	JQGB01000038	2.86
	577	JP74_22815	JQGB01000067	2.86
	578	JP74_18940	JQGB01000036	2.86
	579	JP74_21800	JQGB01000050	2.86
	580	fliM	JQGB01000002	2.85
	581	JP74_19105	JQGB01000036	2.85
	582	JP74_07665	JQGB01000012	2.85
	583	JP74_17555	JQGB01000033	2.85
	584	JP74_18225	JQGB01000034	2.85
	585	JP74_04855	JQGB01000008	2.85
	586	JP74_17570	JQGB01000033	2.85
	587	JP74_19395	JQGB01000036	2.85
	588	JP74_17355	JQGB01000033	2.85
	589	JP74_21105	JQGB01000047	2.84
	590	JP74_19595	JQGB01000038	2.84
	591	JP74_05305	JQGB01000009	2.84
	592	JP74_18380	JQGB01000035	2.84
	593	JP74_12390	JQGB01000021	2.84
	594	JP74_13005	JQGB01000021	2.84
	595	JP74_18190	JQGB01000034	2.84
	596	JP74_11990	JQGB01000020	2.84
	597	JP74_18015	JQGB01000034	2.84
	598	JP74_02760	JQGB01000003	2.83
	599	JP74_07280	JQGB01000012	2.83
	600	JP74_21040	JQGB01000047	2.83
	601	JP74_22735	JQGB01000062	2.83
	602	ureB	JQGB01000012	2.83
	603	JP74_03925	JQGB01000005	2.83
	604	JP74_11705	JQGB01000020	2.83
	605	JP74_15350	JQGB01000026	2.83
	606	JP74_18135	JQGB01000034	2.83
	607	JP74_22875	JQGB01000067	2.83
	608	JP74_08205	JQGB01000012	2.83
	609	JP74_08225	JQGB01000012	2.83
	610	JP74_14445	JQGB01000024	2.83
	611	JP74_12080	JQGB01000021	2.83
	612	JP74_05405	JQGB01000009	2.83
	613	JP74_06620	JQGB01000011	2.83
	614	JP74_17010	JQGB01000029	2.83
	615	JP74_07155	JQGB01000012	2.83
	616	JP74_22550	JQGB01000059	2.82
	617	JP74_08895	JQGB01000014	2.82
	618	JP74_06285	JQGB01000010	2.82
	619	JP74_04870	JQGB01000008	2.82
	620	JP74_03500	JQGB01000004	2.81
	621	JP74_15930	JQGB01000027	2.81
	622	JP74_15440	JQGB01000026	2.81
	623	JP74_10070	JQGB01000016	2.81
	624	JP74_06075	JQGB01000010	2.81
	625	JP74_17000	JQGB01000029	2.81
	626	JP74_01820	JQGB01000002	2.81
	627	JP74_11175	JQGB01000019	2.81
	628	JP74_12300	JQGB01000021	2.81
	629	JP74_18850	JQGB01000035	2.81
	630	JP74_05590	JQGB01000009	2.81
	631	JP74_22070	JQGB01000052	2.81
	632	JP74_16885	JQGB01000029	2.8
	633	JP74_19065	JQGB01000036	2.8
	634	JP74_14505	JQGB01000024	2.8
	635	JP74_05515	JQGB01000009	2.8
	636	JP74_14020	JQGB01000022	2.8
	637	JP74_06395	JQGB01000010	2.8
	638	JP74_22105	JQGB01000052	2.8
	639	JP74_04700	JQGB01000007	2.8
	640	JP74_20180	JQGB01000041	2.8
	641	JP74_14085	JQGB01000023	2.8
	642	JP74_00595	JQGB01000001	2.8
	643	JP74_08700	JQGB01000014	2.8
	644	JP74_09725	JQGB01000015	2.8
	645	JP74_11470	JQGB01000020	2.8
	646	JP74_19515	JQGB01000037	2.8
	647	JP74_20690	JQGB01000045	2.8
	648	JP74_22795	JQGB01000066	2.8
	649	JP74_12295	JQGB01000021	2.79
	650	JP74_08720	JQGB01000014	2.79
	651	JP74_15005	JQGB01000025	2.79
	652	JP74_06745	JQGB01000011	2.79
	653	JP74_20970	JQGB01000047	2.79
	654	JP74_11980	JQGB01000020	2.79
	655	JP74_05490	JQGB01000009	2.79
	656	JP74_12970	JQGB01000021	2.79
	657	JP74_20520	JQGB01000044	2.79
	658	JP74_02045	JQGB01000002	2.79
	659	JP74_05640	JQGB01000009	2.79
	660	JP74_03685	JQGB01000004	2.79
	661	JP74_18320	JQGB01000034	2.78
	662	JP74_10095	JQGB01000016	2.78
	663	JP74_17370	JQGB01000033	2.78
	664	JP74_03445	JQGB01000004	2.78
	665	JP74_15695	JQGB01000027	2.78
	666	JP74_06465	JQGB01000010	2.78
	667	JP74_16085	JQGB01000027	2.78
	668	JP74_22330	JQGB01000054	2.78
	669	JP74_00975	JQGB01000002	2.78
	670	JP74_08025	JQGB01000012	2.78
	671	JP74_00695	JQGB01000001	2.78
	672	JP74_12515	JQGB01000021	2.78
	673	JP74_14095	JQGB01000023	2.78
	674	JP74_22230	JQGB01000054	2.77
	675	dppD (JQGB01000033 31242..32268)	JQGB01000033	2.77
	676	JP74_02030	JQGB01000002	2.77
	677	JP74_06010	JQGB01000010	2.77
	678	JP74_16920	JQGB01000029	2.77
	679	JP74_17285	JQGB01000031	2.77
	680	JP74_15245	JQGB01000026	2.77
	681	JP74_13105	JQGB01000021	2.77
	682	JP74_05115	JQGB01000009	2.77
	683	JP74_08835	JQGB01000014	2.77
	684	JP74_20620	JQGB01000045	2.77
	685	JP74_16980	JQGB01000029	2.77
	686	JP74_22695	JQGB01000062	2.77
	687	JP74_01415	JQGB01000002	2.77
	688	JP74_06280	JQGB01000010	2.77
	689	JP74_16985	JQGB01000029	2.77
	690	JP74_17360	JQGB01000033	2.77
	691	JP74_10610	JQGB01000018	2.77
	692	JP74_05780	JQGB01000009	2.77
	693	JP74_12085	JQGB01000021	2.77
	694	JP74_03140	JQGB01000004	2.77
	695	JP74_07540	JQGB01000012	2.77
	696	JP74_12005	JQGB01000020	2.77
	697	JP74_10415	JQGB01000017	2.76
	698	JP74_19740	JQGB01000038	2.76
	699	JP74_08890	JQGB01000014	2.76
	700	JP74_17160	JQGB01000030	2.76
	701	JP74_11850	JQGB01000020	2.76
	702	JP74_10635	JQGB01000018	2.76
	703	JP74_05190	JQGB01000009	2.76
	704	JP74_22395	JQGB01000055	2.76
	705	JP74_00710	JQGB01000001	2.76
	706	JP74_16795	JQGB01000029	2.76
	707	JP74_06750	JQGB01000011	2.76
	708	JP74_03705	JQGB01000004	2.76
	709	JP74_10850	JQGB01000018	2.76
	710	JP74_12345	JQGB01000021	2.75
	711	JP74_23140	JQGB01000081	2.75
	712	JP74_08670	JQGB01000014	2.75
	713	JP74_20955	JQGB01000047	2.75
	714	JP74_13810	JQGB01000022	2.75
	715	JP74_12990	JQGB01000021	2.75
	716	JP74_06070	JQGB01000010	2.75
	717	JP74_08980	JQGB01000015	2.75
	718	JP74_09325	JQGB01000015	2.75
	719	JP74_11620	JQGB01000020	2.75
	720	JP74_15335	JQGB01000026	2.75
	721	JP74_18260	JQGB01000034	2.75
	722	JP74_21365	JQGB01000048	2.75
	723	JP74_00195	JQGB01000001	2.75
	724	JP74_02840	JQGB01000003	2.75
	725	JP74_03605	JQGB01000004	2.75
	726	JP74_08910	JQGB01000014	2.75
	727	JP74_09330	JQGB01000015	2.75
	728	JP74_11800	JQGB01000020	2.75
	729	JP74_17365	JQGB01000033	2.75
	730	JP74_19310	JQGB01000036	2.75
	731	JP74_12980	JQGB01000021	2.74
	732	JP74_03375	JQGB01000004	2.74
	733	JP74_06210	JQGB01000010	2.74
	734	JP74_15745	JQGB01000027	2.74
	735	JP74_08305	JQGB01000013	2.74
	736	JP74_05200	JQGB01000009	2.74
	737	JP74_08095	JQGB01000012	2.74
	738	JP74_00775	JQGB01000002	2.74
	739	JP74_05520	JQGB01000009	2.74
	740	JP74_05720	JQGB01000009	2.74
	741	JP74_13525	JQGB01000022	2.74
	742	JP74_18220	JQGB01000034	2.74
	743	JP74_07940	JQGB01000012	2.74
	744	JP74_12095	JQGB01000021	2.74
	745	JP74_02805	JQGB01000003	2.74
	746	JP74_16935	JQGB01000029	2.73
	747	JP74_15375	JQGB01000026	2.73
	748	JP74_05075	JQGB01000009	2.73
	749	JP74_22035	JQGB01000052	2.73
	750	JP74_02140	JQGB01000002	2.73
	751	JP74_08300	JQGB01000013	2.73
	752	JP74_19765	JQGB01000038	2.73
	753	JP74_21795	JQGB01000050	2.73
	754	JP74_00110	JQGB01000001	2.73
	755	JP74_00345	JQGB01000001	2.73
	756	JP74_09975	JQGB01000016	2.73
	757	JP74_05555	JQGB01000009	2.73
	758	JP74_05350	JQGB01000009	2.73
	759	JP74_23085	JQGB01000079	2.73
	760	JP74_05005	JQGB01000009	2.72
	761	JP74_22500	JQGB01000056	2.72
	762	JP74_05890	JQGB01000009	2.72
	763	JP74_06795	JQGB01000011	2.72
	764	JP74_19315	JQGB01000036	2.72
	765	JP74_14530	JQGB01000024	2.72
	766	JP74_13295	JQGB01000022	2.72
	767	JP74_07585	JQGB01000012	2.72
	768	JP74_22690	JQGB01000062	2.71
	769	JP74_07250	JQGB01000012	2.71
	770	JP74_17310	JQGB01000031	2.71
	771	JP74_06015	JQGB01000010	2.71
	772	JP74_05030	JQGB01000009	2.71
	773	JP74_08100	JQGB01000012	2.71
	774	JP74_09030	JQGB01000015	2.71
	775	JP74_17330	JQGB01000033	2.71
	776	JP74_05395	JQGB01000009	2.71
	777	JP74_11655	JQGB01000020	2.71
	778	JP74_03735	JQGB01000004	2.71
	779	JP74_02390	JQGB01000002	2.71
	780	JP74_19415	JQGB01000036	2.71
	781	JP74_00290	JQGB01000001	2.71
	782	JP74_13175	JQGB01000022	2.71
	783	JP74_14125	JQGB01000023	2.71
	784	JP74_00770	JQGB01000002	2.7
	785	JP74_00950	JQGB01000002	2.7
	786	JP74_07970	JQGB01000012	2.7
	787	JP74_13820	JQGB01000022	2.7
	788	JP74_18300	JQGB01000034	2.7
	789	JP74_22185	JQGB01000053	2.7
	790	JP74_02280	JQGB01000002	2.7
	791	JP74_06830	JQGB01000011	2.7
	792	JP74_08430	JQGB01000013	2.7
	793	JP74_05575	JQGB01000009	2.7
	794	JP74_05110	JQGB01000009	2.7
	795	JP74_14190	JQGB01000023	2.7
	796	JP74_19620	JQGB01000038	2.7
	797	JP74_12395	JQGB01000021	2.7
	798	JP74_07170	JQGB01000012	2.7
	799	JP74_22065	JQGB01000052	2.7
	800	JP74_07685	JQGB01000012	2.7
	801	JP74_21845	JQGB01000050	2.7
	802	JP74_23035	JQGB01000076	2.69
	803	JP74_08605	JQGB01000014	2.69
	804	JP74_22225	JQGB01000054	2.69
	805	JP74_06755	JQGB01000011	2.69
	806	JP74_02825	JQGB01000003	2.69
	807	JP74_01895	JQGB01000002	2.69
	808	JP74_19760	JQGB01000038	2.69
	809	JP74_07235	JQGB01000012	2.69
	810	JP74_11935	JQGB01000020	2.69
	811	JP74_20035	JQGB01000040	2.69
	812	JP74_08330	JQGB01000013	2.69
	813	JP74_14245	JQGB01000023	2.69
	814	JP74_21675	JQGB01000049	2.69
	815	JP74_16060	JQGB01000027	2.69
	816	JP74_21510	JQGB01000049	2.68
	817	JP74_03470	JQGB01000004	2.68
	818	JP74_17180	JQGB01000030	2.68
	819	JP74_07885	JQGB01000012	2.68
	820	JP74_17045	JQGB01000029	2.68
	821	JP74_10975	JQGB01000018	2.68
	822	JP74_11605	JQGB01000020	2.68
	823	JP74_17490	JQGB01000033	2.68
	824	JP74_02090	JQGB01000002	2.68
	825	JP74_12560	JQGB01000021	2.68
	826	JP74_12725	JQGB01000021	2.68
	827	JP74_17585	JQGB01000033	2.68
	828	JP74_21825	JQGB01000050	2.68
	829	JP74_23135	JQGB01000081	2.68
	830	JP74_23225	JQGB01000088	2.68
	831	ureA	JQGB01000012	2.68
	832	JP74_00955	JQGB01000002	2.68
	833	JP74_15175	JQGB01000026	2.68
	834	JP74_11945	JQGB01000020	2.68
	835	JP74_17765	JQGB01000034	2.67
	836	JP74_06690	JQGB01000011	2.67
	837	JP74_15445	JQGB01000026	2.67
	838	JP74_07595	JQGB01000012	2.67
	839	JP74_07695	JQGB01000012	2.67
	840	JP74_08320	JQGB01000013	2.67
	841	JP74_03550	JQGB01000004	2.67
	842	JP74_01320	JQGB01000002	2.67
	843	JP74_21765	JQGB01000050	2.67
	844	JP74_21025	JQGB01000047	2.67
	845	JP74_12620	JQGB01000021	2.67
	846	JP74_03895	JQGB01000005	2.67
	847	JP74_06810	JQGB01000011	2.67
	848	JP74_04900	JQGB01000008	2.67
	849	JP74_05585	JQGB01000009	2.67
	850	JP74_19805	JQGB01000038	2.67
	851	JP74_05080	JQGB01000009	2.67
	852	JP74_17210	JQGB01000031	2.67
	853	JP74_16090	JQGB01000027	2.66
	854	JP74_16710	JQGB01000029	2.66
	855	JP74_22585	JQGB01000059	2.66
	856	JP74_00650	JQGB01000001	2.66
	857	JP74_01810	JQGB01000002	2.66
	858	JP74_15290	JQGB01000026	2.66
	859	JP74_02670	JQGB01000003	2.66
	860	JP74_21955	JQGB01000052	2.66
	861	JP74_04105	JQGB01000006	2.66
	862	JP74_14595	JQGB01000024	2.66
	863	JP74_20785	JQGB01000045	2.66
	864	JP74_03465	JQGB01000004	2.66
	865	JP74_11885	JQGB01000020	2.66
	866	JP74_16235	JQGB01000027	2.66
	867	JP74_07690	JQGB01000012	2.66
	868	JP74_02455	JQGB01000002	2.66
	869	JP74_17110	JQGB01000030	2.66
	870	JP74_21625	JQGB01000049	2.66
	871	JP74_03870	JQGB01000005	2.66
	872	JP74_15755	JQGB01000027	2.66
	873	JP74_11890	JQGB01000020	2.65
	874	JP74_07670	JQGB01000012	2.65
	875	JP74_07460	JQGB01000012	2.65
	876	JP74_16285	JQGB01000027	2.65
	877	JP74_19375	JQGB01000036	2.65
	878	JP74_03345	JQGB01000004	2.65
	879	JP74_02770	JQGB01000003	2.65
	880	JP74_21000	JQGB01000047	2.65
	881	JP74_04310	JQGB01000006	2.65
	882	JP74_05010	JQGB01000009	2.65
	883	JP74_06615	JQGB01000011	2.65
	884	JP74_15195	JQGB01000026	2.65
	885	JP74_22080	JQGB01000052	2.65
	886	JP74_05895	JQGB01000009	2.65
	887	JP74_10290	JQGB01000017	2.65
	888	JP74_16905	JQGB01000029	2.65
	889	JP74_08970	JQGB01000015	2.65
	890	JP74_01800	JQGB01000002	2.65
	891	JP74_12010	JQGB01000020	2.64
	892	JP74_00930	JQGB01000002	2.64
	893	JP74_01175	JQGB01000002	2.64
	894	JP74_05820	JQGB01000009	2.64
	895	JP74_03640	JQGB01000004	2.64
	896	JP74_13125	JQGB01000022	2.64
	897	JP74_05165	JQGB01000009	2.64
	898	JP74_21690	JQGB01000049	2.64
	899	JP74_20615	JQGB01000045	2.64
	900	JP74_04555	JQGB01000006	2.64
	901	JP74_10135	JQGB01000016	2.64
	902	JP74_23415	JQGB01000108	2.64
	903	JP74_20130	JQGB01000041	2.64
	904	JP74_01070	JQGB01000002	2.63
	905	JP74_05290	JQGB01000009	2.63
	906	JP74_10920	JQGB01000018	2.63
	907	JP74_17980	JQGB01000034	2.63
	908	JP74_22755	JQGB01000063	2.63
	909	JP74_09295	JQGB01000015	2.63
	910	JP74_09580	JQGB01000015	2.63
	911	JP74_01825	JQGB01000002	2.63
	912	JP74_17740	JQGB01000034	2.63
	913	JP74_15855	JQGB01000027	2.63
	914	JP74_19320	JQGB01000036	2.63
	915	JP74_16725	JQGB01000029	2.63
	916	JP74_14520	JQGB01000024	2.63
	917	JP74_03525	JQGB01000004	2.62
	918	JP74_14855	JQGB01000025	2.62
	919	JP74_10280	JQGB01000017	2.62
	920	JP74_21295	JQGB01000048	2.62
	921	JP74_21695	JQGB01000049	2.62
	922	JP74_08310	JQGB01000013	2.62
	923	JP74_00765	JQGB01000002	2.62
	924	JP74_01465	JQGB01000002	2.62
	925	JP74_01445	JQGB01000002	2.62
	926	JP74_04750	JQGB01000007	2.62
	927	JP74_05625	JQGB01000009	2.61
	928	JP74_15070	JQGB01000025	2.61
	929	JP74_12015	JQGB01000020	2.61
	930	JP74_16075	JQGB01000027	2.61
	931	JP74_04815	JQGB01000007	2.61
	932	JP74_21715	JQGB01000050	2.61
	933	JP74_08005	JQGB01000012	2.61
	934	JP74_22470	JQGB01000056	2.61
	935	JP74_09220	JQGB01000015	2.61
	936	JP74_23130	JQGB01000081	2.61
	937	JP74_07255	JQGB01000012	2.61
	938	JP74_03655	JQGB01000004	2.61
	939	JP74_12400	JQGB01000021	2.61
	940	JP74_08440	JQGB01000013	2.61
	941	JP74_11480	JQGB01000020	2.61
	942	JP74_09435	JQGB01000015	2.6
	943	JP74_20945	JQGB01000047	2.6
	944	JP74_09660	JQGB01000015	2.6
	945	JP74_19185	JQGB01000036	2.6
	946	JP74_22170	JQGB01000052	2.6
	947	JP74_00985	JQGB01000002	2.6
	948	JP74_00530	JQGB01000001	2.6
	949	JP74_02555	JQGB01000002	2.6
	950	JP74_21920	JQGB01000052	2.6
	951	JP74_06195	JQGB01000010	2.6
	952	JP74_19400	JQGB01000036	2.6
	953	JP74_20585	JQGB01000045	2.6
	954	JP74_17255	JQGB01000031	2.6
	955	JP74_19550	JQGB01000037	2.6
	956	JP74_07080	JQGB01000012	2.6
	957	JP74_03230	JQGB01000004	2.6
	958	JP74_19410	JQGB01000036	2.6
	959	JP74_12675	JQGB01000021	2.6
	960	JP74_19835	JQGB01000039	2.6
	961	JP74_22055	JQGB01000052	2.6
	962	JP74_14010	JQGB01000022	2.59
	963	JP74_13115	JQGB01000021	2.59
	964	JP74_15580	JQGB01000027	2.59
	965	JP74_03820	JQGB01000004	2.59
	966	JP74_03515	JQGB01000004	2.59
	967	JP74_12610	JQGB01000021	2.59
	968	JP74_00535	JQGB01000001	2.59
	969	JP74_04550	JQGB01000006	2.59
	970	JP74_04580	JQGB01000006	2.59
	971	JP74_21130	JQGB01000047	2.59
	972	JP74_01450	JQGB01000002	2.59
	973	JP74_16370	JQGB01000027	2.59
	974	JP74_17715	JQGB01000034	2.59
	975	JP74_02655	JQGB01000003	2.59
	976	JP74_05445	JQGB01000009	2.59
	977	JP74_17855	JQGB01000034	2.59
	978	JP74_19240	JQGB01000036	2.58
	979	JP74_03675	JQGB01000004	2.58
	980	JP74_05690	JQGB01000009	2.58
	981	JP74_12290	JQGB01000021	2.58
	982	JP74_04120	JQGB01000006	2.58
	983	JP74_22100	JQGB01000052	2.58
	984	JP74_05795	JQGB01000009	2.58
	985	JP74_05805	JQGB01000009	2.58
	986	JP74_00340	JQGB01000001	2.58
	987	JP74_00870	JQGB01000002	2.58
	988	JP74_01760	JQGB01000002	2.58
	989	JP74_06670	JQGB01000011	2.58
	990	JP74_07040	JQGB01000012	2.58
	991	JP74_07055	JQGB01000012	2.58
	992	JP74_07740	JQGB01000012	2.58
	993	JP74_09235	JQGB01000015	2.58
	994	JP74_10815	JQGB01000018	2.58
	995	JP74_11015	JQGB01000018	2.58
	996	JP74_11535	JQGB01000020	2.58
	997	JP74_11925	JQGB01000020	2.58
	998	JP74_13675	JQGB01000022	2.58
	999	JP74_14025	JQGB01000022	2.58
	1000	JP74_14275	JQGB01000023	2.58
	1001	JP74_15185	JQGB01000026	2.58
	1002	JP74_15795	JQGB01000027	2.58
	1003	JP74_16660	JQGB01000028	2.58
	1004	JP74_16925	JQGB01000029	2.58
	1005	JP74_18845	JQGB01000035	2.58
	1006	JP74_19710	JQGB01000038	2.58
	1007	JP74_20200	JQGB01000041	2.58
	1008	JP74_20240	JQGB01000041	2.58
	1009	JP74_21050	JQGB01000047	2.58
	1010	JP74_21125	JQGB01000047	2.58
	1011	JP74_22270	JQGB01000054	2.58
	1012	JP74_23030	JQGB01000075	2.58
	1013	JP74_22570	JQGB01000059	2.58
	1014	JP74_09715	JQGB01000015	2.57
	1015	JP74_20645	JQGB01000045	2.57
	1016	JP74_17525	JQGB01000033	2.57
	1017	JP74_06760	JQGB01000011	2.57
	1018	JP74_04230	JQGB01000006	2.57
	1019	JP74_07135	JQGB01000012	2.57
	1020	JP74_15995	JQGB01000027	2.57
	1021	JP74_11520	JQGB01000020	2.57
	1022	JP74_08340	JQGB01000013	2.57
	1023	JP74_01335	JQGB01000002	2.57
	1024	JP74_05530	JQGB01000009	2.57
	1025	JP74_08335	JQGB01000013	2.56
	1026	JP74_20420	JQGB01000043	2.56
	1027	JP74_22375	JQGB01000055	2.56
	1028	JP74_02650	JQGB01000003	2.56
	1029	JP74_04965	JQGB01000009	2.56
	1030	JP74_14425	JQGB01000024	2.56
	1031	JP74_04740	JQGB01000007	2.56
	1032	JP74_20635	JQGB01000045	2.56
	1033	JP74_16990	JQGB01000029	2.56
	1034	JP74_20280	JQGB01000042	2.56
	1035	JP74_12490	JQGB01000021	2.56
	1036	JP74_21560	JQGB01000049	2.56
	1037	JP74_10320	JQGB01000017	2.56
	1038	JP74_03680	JQGB01000004	2.56
	1039	JP74_02270	JQGB01000002	2.56
	1040	JP74_18195	JQGB01000034	2.56
	1041	JP74_12215	JQGB01000021	2.56
	1042	JP74_20655	JQGB01000045	2.56
	1043	JP74_06675	JQGB01000011	2.56
	1044	JP74_13085	JQGB01000021	2.56
	1045	JP74_13780	JQGB01000022	2.56
	1046	JP74_03095	JQGB01000004	2.56
	1047	JP74_19350	JQGB01000036	2.55
	1048	JP74_17200	JQGB01000031	2.55
	1049	JP74_08660	JQGB01000014	2.55
	1050	JP74_11335	JQGB01000020	2.55
	1051	JP74_11100	JQGB01000019	2.55
	1052	JP74_20375	JQGB01000043	2.55
	1053	JP74_16740	JQGB01000029	2.55
	1054	hrcA	JQGB01000009	2.55
	1055	JP74_17155	JQGB01000030	2.55
	1056	JP74_18810	JQGB01000035	2.55
	1057	JP74_02725	JQGB01000003	2.55
	1058	JP74_05370	JQGB01000009	2.55
	1059	JP74_07310	JQGB01000012	2.55
	1060	JP74_13195	JQGB01000022	2.55
	1061	JP74_12340	JQGB01000021	2.55
	1062	JP74_19755	JQGB01000038	2.55
	1063	JP74_07180	JQGB01000012	2.55
	1064	JP74_08820	JQGB01000014	2.55
	1065	JP74_09275	JQGB01000015	2.55
	1066	JP74_09860	JQGB01000015	2.54
	1067	JP74_04680	JQGB01000007	2.54
	1068	JP74_00085	JQGB01000001	2.54
	1069	JP74_02860	JQGB01000003	2.54
	1070	JP74_11450	JQGB01000020	2.54
	1071	JP74_16800	JQGB01000029	2.54
	1072	JP74_20395	JQGB01000043	2.54
	1073	JP74_18140	JQGB01000034	2.54
	1074	JP74_19145	JQGB01000036	2.54
	1075	JP74_14005	JQGB01000022	2.54
	1076	JP74_19695	JQGB01000038	2.54
	1077	JP74_01880	JQGB01000002	2.54
	1078	JP74_17800	JQGB01000034	2.54
	1079	JP74_11350	JQGB01000020	2.54
	1080	JP74_02525	JQGB01000002	2.54
	1081	JP74_09495	JQGB01000015	2.54
	1082	JP74_05875	JQGB01000009	2.54
	1083	JP74_20400	JQGB01000043	2.54
	1084	JP74_16865	JQGB01000029	2.53
	1085	JP74_19690	JQGB01000038	2.53
	1086	JP74_08985	JQGB01000015	2.53
	1087	JP74_08955	JQGB01000015	2.53
	1088	JP74_12870	JQGB01000021	2.53
	1089	JP74_14705	JQGB01000025	2.53
	1090	JP74_15340	JQGB01000026	2.53
	1091	JP74_21780	JQGB01000050	2.53
	1092	JP74_06705	JQGB01000011	2.53
	1093	JP74_04785	JQGB01000007	2.53
	1094	JP74_12670	JQGB01000021	2.53
	1095	JP74_04175	JQGB01000006	2.53
	1096	JP74_08400	JQGB01000013	2.53
	1097	JP74_08900	JQGB01000014	2.53
	1098	JP74_00750	JQGB01000002	2.53
	1099	JP74_00050	JQGB01000001	2.53
	1100	JP74_14465	JQGB01000024	2.53
	1101	JP74_22265	JQGB01000054	2.53
	1102	JP74_06560	JQGB01000010	2.53
	1103	JP74_21660	JQGB01000049	2.53
	1104	JP74_22135	JQGB01000052	2.53
	1105	JP74_12965	JQGB01000021	2.53
	1106	JP74_01025	JQGB01000002	2.52
	1107	JP74_16640	JQGB01000028	2.52
	1108	JP74_00285	JQGB01000001	2.52
	1109	JP74_17205	JQGB01000031	2.52
	1110	JP74_12830	JQGB01000021	2.52
	1111	JP74_10580	JQGB01000018	2.52
	1112	JP74_17055	JQGB01000029	2.52
	1113	JP74_13885	JQGB01000022	2.52
	1114	JP74_17600	JQGB01000033	2.52
	1115	JP74_20710	JQGB01000045	2.52
	1116	JP74_01135	JQGB01000002	2.52
	1117	JP74_02855	JQGB01000003	2.52
	1118	JP74_22540	JQGB01000058	2.52
	1119	cpsB	JQGB01000022	2.52
	1120	JP74_01535	JQGB01000002	2.52
	1121	rbcL	JQGB01000004	2.52
	1122	JP74_16975	JQGB01000029	2.51
	1123	cpdB	JQGB01000020	2.51
	1124	JP74_01945	JQGB01000002	2.51
	1125	JP74_11430	JQGB01000020	2.51
	1126	JP74_16550	JQGB01000027	2.51
	1127	JP74_03425	JQGB01000004	2.51
	1128	JP74_06625	JQGB01000011	2.51
	1129	JP74_02505	JQGB01000002	2.51
	1130	JP74_09835	JQGB01000015	2.51
	1131	JP74_12910	JQGB01000021	2.51
	1132	JP74_15300	JQGB01000026	2.51
	1133	JP74_00250	JQGB01000001	2.51
	1134	JP74_12890	JQGB01000021	2.51
	1135	JP74_14550	JQGB01000024	2.51
	1136	JP74_09465	JQGB01000015	2.51
	1137	JP74_09820	JQGB01000015	2.51
	1138	JP74_16775	JQGB01000029	2.51
	1139	JP74_02350	JQGB01000002	2.51
	1140	JP74_09645	JQGB01000015	2.51
	1141	JP74_12755	JQGB01000021	2.5
	1142	JP74_12995	JQGB01000021	2.5
	1143	JP74_06890	JQGB01000011	2.5
	1144	JP74_09240	JQGB01000015	2.5
	1145	JP74_13685	JQGB01000022	2.5
	1146	JP74_14360	JQGB01000024	2.5
	1147	JP74_05125	JQGB01000009	2.5
	1148	JP74_07490	JQGB01000012	2.5
	1149	JP74_20455	JQGB01000043	2.5
	1150	JP74_21830	JQGB01000050	2.5
	1151	JP74_09620	JQGB01000015	2.5
	1152	JP74_12510	JQGB01000021	2.5
	1153	JP74_07505	JQGB01000012	2.5
	1154	JP74_14555	JQGB01000024	2.5
	1155	JP74_00745	JQGB01000002	2.5
	1156	JP74_21685	JQGB01000049	2.5
	1157	JP74_15020	JQGB01000025	2.5
	1158	JP74_07025	JQGB01000012	2.5
	1159	JP74_00440	JQGB01000001	2.5
	1160	JP74_08450	JQGB01000013	2.49
	1161	JP74_05310	JQGB01000009	2.49
	1162	JP74_11075	JQGB01000019	2.49
	1163	JP74_09915	JQGB01000015	2.49
	1164	pepN	JQGB01000047	2.49
	1165	JP74_08150	JQGB01000012	2.49
	1166	JP74_07140	JQGB01000012	2.49
	1167	JP74_18775	JQGB01000035	2.49
	1168	JP74_05460	JQGB01000009	2.49
	1169	JP74_03365	JQGB01000004	2.49
	1170	JP74_21075	JQGB01000047	2.49
	1171	JP74_20985	JQGB01000047	2.49
	1172	JP74_05420	JQGB01000009	2.49
	1173	JP74_04100	JQGB01000006	2.48
	1174	JP74_22340	JQGB01000054	2.48
	1175	JP74_21020	JQGB01000047	2.48
	1176	JP74_00225	JQGB01000001	2.48
	1177	JP74_09305	JQGB01000015	2.48
	1178	JP74_18755	JQGB01000035	2.48
	1179	JP74_12465	JQGB01000021	2.48
	1180	JP74_09695	JQGB01000015	2.48
	1181	JP74_06725	JQGB01000011	2.48
	1182	eno	JQGB01000027	2.48
	1183	JP74_17730	JQGB01000034	2.48
	1184	JP74_23025	JQGB01000074	2.48
	1185	JP74_22140	JQGB01000052	2.48
	1186	JP74_00140	JQGB01000001	2.48
	1187	JP74_17290	JQGB01000031	2.48
	1188	JP74_12840	JQGB01000021	2.48
	1189	JP74_10105	JQGB01000016	2.48
	1190	JP74_23020	JQGB01000074	2.48
	1191	JP74_16030	JQGB01000027	2.48
	1192	JP74_18315	JQGB01000034	2.48
	1193	JP74_07105	JQGB01000012	2.48
	1194	JP74_13260	JQGB01000022	2.48
	1195	JP74_05040	JQGB01000009	2.48
	1196	JP74_00480	JQGB01000001	2.47
	1197	JP74_10695	JQGB01000018	2.47
	1198	JP74_00310	JQGB01000001	2.47
	1199	JP74_00760	JQGB01000002	2.47
	1200	JP74_03575	JQGB01000004	2.47
	1201	JP74_03815	JQGB01000004	2.47
	1202	JP74_07045	JQGB01000012	2.47
	1203	JP74_07130	JQGB01000012	2.47
	1204	JP74_09320	JQGB01000015	2.47
	1205	JP74_09485	JQGB01000015	2.47
	1206	JP74_16940	JQGB01000029	2.47
	1207	JP74_21070	JQGB01000047	2.47
	1208	JP74_21555	JQGB01000049	2.47
	1209	JP74_21835	JQGB01000050	2.47
	1210	JP74_22900	JQGB01000068	2.47
	1211	JP74_03955	JQGB01000005	2.47
	1212	JP74_04150	JQGB01000006	2.47
	1213	JP74_08560	JQGB01000014	2.47
	1214	JP74_15225	JQGB01000026	2.47
	1215	JP74_22625	JQGB01000060	2.47
	1216	JP74_04810	JQGB01000007	2.47
	1217	JP74_11345	JQGB01000020	2.47
	1218	JP74_11855	JQGB01000020	2.47
	1219	JP74_13850	JQGB01000022	2.47
	1220	JP74_19200	JQGB01000036	2.47
	1221	JP74_08865	JQGB01000014	2.47
	1222	JP74_04840	JQGB01000008	2.47
	1223	JP74_15705	JQGB01000027	2.47
	1224	JP74_17820	JQGB01000034	2.47
	1225	JP74_10365	JQGB01000017	2.47
	1226	gabD (JQGB01000033 43894..45349)	JQGB01000033	2.46
	1227	JP74_07375	JQGB01000012	2.46
	1228	JP74_17815	JQGB01000034	2.46
	1229	JP74_18160	JQGB01000034	2.46
	1230	JP74_02565	JQGB01000002	2.46
	1231	JP74_21505	JQGB01000049	2.46
	1232	JP74_00190	JQGB01000001	2.46
	1233	JP74_20705	JQGB01000045	2.46
	1234	JP74_02620	JQGB01000002	2.46
	1235	JP74_19060	JQGB01000036	2.46
	1236	JP74_04110	JQGB01000006	2.46
	1237	JP74_08425	JQGB01000013	2.46
	1238	JP74_20020	JQGB01000040	2.46
	1239	JP74_05740	JQGB01000009	2.46
	1240	JP74_18275	JQGB01000034	2.46
	1241	JP74_04485	JQGB01000006	2.46
	1242	JP74_07030	JQGB01000012	2.46
	1243	JP74_14860	JQGB01000025	2.46
	1244	JP74_16845	JQGB01000029	2.46
	1245	JP74_17985	JQGB01000034	2.46
	1246	JP74_03740	JQGB01000004	2.46
	1247	JP74_15900	JQGB01000027	2.45
	1248	JP74_17305	JQGB01000031	2.45
	1249	JP74_02115	JQGB01000002	2.45
	1250	JP74_04035	JQGB01000005	2.45
	1251	JP74_17945	JQGB01000034	2.45
	1252	JP74_03950	JQGB01000005	2.45
	1253	JP74_04690	JQGB01000007	2.45
	1254	JP74_05425	JQGB01000009	2.45
	1255	JP74_10505	JQGB01000018	2.45
	1256	JP74_22605	JQGB01000060	2.45
	1257	JP74_05955	JQGB01000009	2.45
	1258	JP74_06300	JQGB01000010	2.45
	1259	JP74_22920	JQGB01000070	2.45
	1260	JP74_01330	JQGB01000002	2.45
	1261	JP74_06590	JQGB01000010	2.45
	1262	JP74_06600	JQGB01000011	2.45
	1263	JP74_15430	JQGB01000026	2.45
	1264	JP74_18460	JQGB01000035	2.45
	1265	JP74_10490	JQGB01000018	2.45
	1266	JP74_15240	JQGB01000026	2.45
	1267	JP74_17125	JQGB01000030	2.45
	1268	pgk (JQGB01000004 75160..76375)	JQGB01000004	2.45
	1269	JP74_21480	JQGB01000049	2.45
	1270	JP74_14460	JQGB01000024	2.44
	1271	JP74_17910	JQGB01000034	2.44
	1272	JP74_01275	JQGB01000002	2.44
	1273	JP74_16380	JQGB01000027	2.44
	1274	JP74_06585	JQGB01000010	2.44
	1275	JP74_08635	JQGB01000014	2.44
	1276	JP74_04905	JQGB01000008	2.44
	1277	JP74_15820	JQGB01000027	2.44
	1278	JP74_12735	JQGB01000021	2.44
	1279	JP74_14450	JQGB01000024	2.44
	1280	JP74_10330	JQGB01000017	2.44
	1281	JP74_02820	JQGB01000003	2.44
	1282	JP74_08390	JQGB01000013	2.44
	1283	JP74_02870	JQGB01000003	2.44
	1284	JP74_04875	JQGB01000008	2.44
	1285	JP74_05430	JQGB01000009	2.44
	1286	JP74_11380	JQGB01000020	2.44
	1287	JP74_15415	JQGB01000026	2.44
	1288	JP74_15420	JQGB01000026	2.44
	1289	JP74_18115	JQGB01000034	2.43
	1290	JP74_15750	JQGB01000027	2.43
	1291	JP74_00125	JQGB01000001	2.43
	1292	JP74_06805	JQGB01000011	2.43
	1293	JP74_21255	JQGB01000048	2.43
	1294	JP74_08270	JQGB01000013	2.43
	1295	JP74_18805	JQGB01000035	2.43
	1296	JP74_04140	JQGB01000006	2.43
	1297	JP74_10180	JQGB01000016	2.43
	1298	JP74_09175	JQGB01000015	2.43
	1299	JP74_21570	JQGB01000049	2.43
	1300	JP74_02700	JQGB01000003	2.43
	1301	JP74_05680	JQGB01000009	2.43
	1302	JP74_19340	JQGB01000036	2.43
	1303	JP74_21260	JQGB01000048	2.43
	1304	JP74_10100	JQGB01000016	2.43
	1305	JP74_16130	JQGB01000027	2.43
	1306	JP74_11080	JQGB01000019	2.43
	1307	JP74_17735	JQGB01000034	2.43
	1308	JP74_17535	JQGB01000033	2.42
	1309	JP74_13355	JQGB01000022	2.42
	1310	JP74_13110	JQGB01000021	2.42
	1311	JP74_13900	JQGB01000022	2.42
	1312	JP74_09800	JQGB01000015	2.42
	1313	JP74_17405	JQGB01000033	2.42
	1314	JP74_04180	JQGB01000006	2.42
	1315	JP74_21230	JQGB01000047	2.42
	1316	JP74_04790	JQGB01000007	2.42
	1317	JP74_19165	JQGB01000036	2.42
	1318	JP74_08815	JQGB01000014	2.42
	1319	JP74_18950	JQGB01000036	2.42
	1320	JP74_22720	JQGB01000062	2.42
	1321	JP74_15585	JQGB01000027	2.42
	1322	JP74_20990	JQGB01000047	2.42
	1323	JP74_07610	JQGB01000012	2.42
	1324	JP74_23245	JQGB01000090	2.42
	1325	JP74_15775	JQGB01000027	2.42
	1326	JP74_22030	JQGB01000052	2.42
	1327	JP74_10335	JQGB01000017	2.42
	1328	JP74_21035	JQGB01000047	2.42
	1329	JP74_21925	JQGB01000052	2.42
	1330	JP74_04850	JQGB01000008	2.42
	1331	JP74_23145	JQGB01000081	2.42
	1332	JP74_08220	JQGB01000012	2.42
	1333	JP74_00790	JQGB01000002	2.42
	1334	JP74_20800	JQGB01000045	2.42
	1335	JP74_03585	JQGB01000004	2.41
	1336	JP74_08790	JQGB01000014	2.41
	1337	JP74_07035	JQGB01000012	2.41
	1338	JP74_19615	JQGB01000038	2.41
	1339	JP74_08655	JQGB01000014	2.41
	1340	JP74_14320	JQGB01000024	2.41
	1341	JP74_08905	JQGB01000014	2.41
	1342	JP74_00160	JQGB01000001	2.41
	1343	JP74_09395	JQGB01000015	2.41
	1344	JP74_15910	JQGB01000027	2.41
	1345	JP74_17925	JQGB01000034	2.41
	1346	JP74_17615	JQGB01000033	2.41
	1347	JP74_12630	JQGB01000021	2.41
	1348	JP74_11540	JQGB01000020	2.4
	1349	JP74_14280	JQGB01000023	2.4
	1350	JP74_19770	JQGB01000038	2.4
	1351	JP74_03570	JQGB01000004	2.4
	1352	JP74_06165	JQGB01000010	2.4
	1353	JP74_07815	JQGB01000012	2.4
	1354	JP74_08520	JQGB01000014	2.4
	1355	JP74_09735	JQGB01000015	2.4
	1356	JP74_09920	JQGB01000015	2.4
	1357	JP74_10065	JQGB01000016	2.4
	1358	JP74_13090	JQGB01000021	2.4
	1359	JP74_13300	JQGB01000022	2.4
	1360	JP74_15555	JQGB01000026	2.4
	1361	JP74_21615	JQGB01000049	2.4
	1362	JP74_22295	JQGB01000054	2.4
	1363	JP74_22980	JQGB01000072	2.4
	1364	JP74_09285	JQGB01000015	2.4
	1365	JP74_11485	JQGB01000020	2.4
	1366	JP74_14105	JQGB01000023	2.4
	1367	JP74_03250	JQGB01000004	2.4
	1368	JP74_17375	JQGB01000033	2.4
	1369	JP74_03790	JQGB01000004	2.4
	1370	JP74_13015	JQGB01000021	2.4
	1371	JP74_17960	JQGB01000034	2.4
	1372	JP74_13275	JQGB01000022	2.4
	1373	JP74_12435	JQGB01000021	2.39
	1374	JP74_18020	JQGB01000034	2.39
	1375	JP74_12030	JQGB01000020	2.39
	1376	JP74_21160	JQGB01000047	2.39
	1377	JP74_18035	JQGB01000034	2.39
	1378	JP74_10405	JQGB01000017	2.39
	1379	JP74_20390	JQGB01000043	2.39
	1380	JP74_06915	JQGB01000011	2.39
	1381	JP74_00430	JQGB01000001	2.39
	1382	JP74_05210	JQGB01000009	2.39
	1383	JP74_11930	JQGB01000020	2.39
	1384	JP74_08275	JQGB01000013	2.39
	1385	JP74_03660	JQGB01000004	2.39
	1386	JP74_16565	JQGB01000028	2.39
	1387	JP74_18920	JQGB01000035	2.39
	1388	JP74_09140	JQGB01000015	2.39
	1389	JP74_01050	JQGB01000002	2.39
	1390	JP74_10160	JQGB01000016	2.39
	1391	JP74_10955	JQGB01000018	2.39
	1392	JP74_06770	JQGB01000011	2.39
	1393	JP74_07515	JQGB01000012	2.39
	1394	JP74_04340	JQGB01000006	2.39
	1395	JP74_22165	JQGB01000052	2.38
	1396	JP74_17115	JQGB01000030	2.38
	1397	JP74_16910	JQGB01000029	2.38
	1398	JP74_21535	JQGB01000049	2.38
	1399	JP74_19330	JQGB01000036	2.38
	1400	JP74_18150	JQGB01000034	2.38
	1401	JP74_12865	JQGB01000021	2.38
	1402	JP74_09745	JQGB01000015	2.38
	1403	JP74_22260	JQGB01000054	2.38
	1404	JP74_16875	JQGB01000029	2.38
	1405	JP74_16040	JQGB01000027	2.38
	1406	JP74_17640	JQGB01000034	2.38
	1407	JP74_18105	JQGB01000034	2.38
	1408	JP74_00825	JQGB01000002	2.38
	1409	JP74_02640	JQGB01000003	2.38
	1410	JP74_04695	JQGB01000007	2.38
	1411	JP74_05135	JQGB01000009	2.38
	1412	JP74_11120	JQGB01000019	2.38
	1413	JP74_12690	JQGB01000021	2.38
	1414	JP74_13475	JQGB01000022	2.38
	1415	JP74_19455	JQGB01000037	2.38
	1416	JP74_05130	JQGB01000009	2.38
	1417	JP74_05580	JQGB01000009	2.38
	1418	JP74_14975	JQGB01000025	2.38
	1419	JP74_18905	JQGB01000035	2.37
	1420	JP74_14510	JQGB01000024	2.37
	1421	JP74_16540	JQGB01000027	2.37
	1422	JP74_00895	JQGB01000002	2.37
	1423	JP74_13250	JQGB01000022	2.37
	1424	JP74_07735	JQGB01000012	2.37
	1425	JP74_00630	JQGB01000001	2.37
	1426	JP74_01835	JQGB01000002	2.37
	1427	JP74_05360	JQGB01000009	2.37
	1428	JP74_01530	JQGB01000002	2.37
	1429	JP74_13655	JQGB01000022	2.37
	1430	JP74_03560	JQGB01000004	2.37
	1431	JP74_09910	JQGB01000015	2.37
	1432	JP74_15890	JQGB01000027	2.37
	1433	JP74_13080	JQGB01000021	2.37
	1434	JP74_00095	JQGB01000001	2.37
	1435	JP74_00800	JQGB01000002	2.37
	1436	JP74_04195	JQGB01000006	2.37
	1437	JP74_07335	JQGB01000012	2.37
	1438	JP74_20880	JQGB01000047	2.37
	1439	JP74_21600	JQGB01000049	2.37
	1440	JP74_22075	JQGB01000052	2.37
	1441	JP74_09805	JQGB01000015	2.37
	1442	JP74_19610	JQGB01000038	2.37
	1443	JP74_03845	JQGB01000005	2.37
	1444	JP74_00555	JQGB01000001	2.37
	1445	JP74_03530	JQGB01000004	2.37
	1446	JP74_10430	JQGB01000017	2.37
	1447	JP74_17705	JQGB01000034	2.37
	1448	JP74_12955	JQGB01000021	2.37
	1449	JP74_08935	JQGB01000014	2.37
	1450	JP74_09575	JQGB01000015	2.37
	1451	JP74_16045	JQGB01000027	2.37
	1452	JP74_20345	JQGB01000043	2.37
	1453	JP74_06025	JQGB01000010	2.36
	1454	JP74_08550	JQGB01000014	2.36
	1455	JP74_09090	JQGB01000015	2.36
	1456	JP74_16050	JQGB01000027	2.36
	1457	JP74_06130	JQGB01000010	2.36
	1458	JP74_21135	JQGB01000047	2.36
	1459	JP74_02430	JQGB01000002	2.36
	1460	JP74_06775	JQGB01000011	2.36
	1461	JP74_20055	JQGB01000040	2.36
	1462	JP74_10260	JQGB01000017	2.36
	1463	JP74_17040	JQGB01000029	2.36
	1464	JP74_01360	JQGB01000002	2.36
	1465	JP74_04755	JQGB01000007	2.36
	1466	JP74_05705	JQGB01000009	2.36
	1467	JP74_05145	JQGB01000009	2.36
	1468	JP74_08830	JQGB01000014	2.36
	1469	JP74_08050	JQGB01000012	2.35
	1470	JP74_12140	JQGB01000021	2.35
	1471	JP74_12220	JQGB01000021	2.35
	1472	JP74_18450	JQGB01000035	2.35
	1473	JP74_06515	JQGB01000010	2.35
	1474	JP74_08405	JQGB01000013	2.35
	1475	JP74_09075	JQGB01000015	2.35
	1476	JP74_10710	JQGB01000018	2.35
	1477	JP74_15990	JQGB01000027	2.35
	1478	JP74_21670	JQGB01000049	2.35
	1479	JP74_15955	JQGB01000027	2.35
	1480	JP74_06660	JQGB01000011	2.35
	1481	JP74_15735	JQGB01000027	2.35
	1482	JP74_04500	JQGB01000006	2.35
	1483	JP74_08610	JQGB01000014	2.35
	1484	JP74_08650	JQGB01000014	2.35
	1485	JP74_16620	JQGB01000028	2.35
	1486	JP74_17660	JQGB01000034	2.35
	1487	JP74_18370	JQGB01000035	2.35
	1488	JP74_02780	JQGB01000003	2.35
	1489	JP74_16635	JQGB01000028	2.35
	1490	JP74_01105	JQGB01000002	2.35
	1491	JP74_21280	JQGB01000048	2.35
	1492	JP74_22010	JQGB01000052	2.35
	1493	JP74_17835	JQGB01000034	2.35
	1494	JP74_17620	JQGB01000033	2.35
	1495	JP74_16455	JQGB01000027	2.35
	1496	JP74_18180	JQGB01000034	2.35
	1497	flhA	JQGB01000001	2.34
	1498	JP74_01955	JQGB01000002	2.34
	1499	JP74_04655	JQGB01000006	2.34
	1500	JP74_04735	JQGB01000007	2.34
	1501	JP74_22645	JQGB01000062	2.34
	1502	JP74_11670	JQGB01000020	2.34
	1503	JP74_22630	JQGB01000060	2.34
	1504	JP74_07615	JQGB01000012	2.34
	1505	JP74_11760	JQGB01000020	2.34
	1506	JP74_23305	JQGB01000093	2.34
	1507	JP74_15400	JQGB01000026	2.34
	1508	JP74_09685	JQGB01000015	2.34
	1509	JP74_21620	JQGB01000049	2.34
	1510	JP74_08375	JQGB01000013	2.34
	1511	JP74_14585	JQGB01000024	2.34
	1512	JP74_02385	JQGB01000002	2.34
	1513	JP74_07875	JQGB01000012	2.34
	1514	JP74_10985	JQGB01000018	2.34
	1515	JP74_13285	JQGB01000022	2.34
	1516	JP74_20600	JQGB01000045	2.34
	1517	JP74_20850	JQGB01000047	2.34
	1518	JP74_05950	JQGB01000009	2.34
	1519	JP74_16065	JQGB01000027	2.34
	1520	JP74_21325	JQGB01000048	2.34
	1521	JP74_05280	JQGB01000009	2.34
	1522	JP74_07120	JQGB01000012	2.34
	1523	JP74_20310	JQGB01000043	2.34
	1524	JP74_21385	JQGB01000048	2.34
	1525	pdxA	JQGB01000018	2.34
	1526	JP74_13095	JQGB01000021	2.33
	1527	JP74_08600	JQGB01000014	2.33
	1528	JP74_05225	JQGB01000009	2.33
	1529	JP74_08840	JQGB01000014	2.33
	1530	JP74_19460	JQGB01000037	2.33
	1531	JP74_18615	JQGB01000035	2.33
	1532	JP74_04185	JQGB01000006	2.33
	1533	JP74_07010	JQGB01000012	2.33
	1534	JP74_16115	JQGB01000027	2.33
	1535	JP74_13020	JQGB01000021	2.33
	1536	JP74_03595	JQGB01000004	2.33
	1537	JP74_17225	JQGB01000031	2.33
	1538	JP74_07225	JQGB01000012	2.33
	1539	JP74_13270	JQGB01000022	2.33
	1540	JP74_08735	JQGB01000014	2.33
	1541	JP74_15380	JQGB01000026	2.33
	1542	JP74_11280	JQGB01000020	2.33
	1543	JP74_09335	JQGB01000015	2.33
	1544	JP74_00395	JQGB01000001	2.33
	1545	JP74_01160	JQGB01000002	2.33
	1546	JP74_03310	JQGB01000004	2.33
	1547	JP74_03765	JQGB01000004	2.33
	1548	JP74_17915	JQGB01000034	2.33
	1549	JP74_03795	JQGB01000004	2.32
	1550	JP74_15860	JQGB01000027	2.32
	1551	JP74_18230	JQGB01000034	2.32
	1552	JP74_02815	JQGB01000003	2.32
	1553	JP74_02775	JQGB01000003	2.32
	1554	JP74_04615	JQGB01000006	2.32
	1555	flbT	JQGB01000002	2.32
	1556	JP74_04660	JQGB01000006	2.32
	1557	JP74_07285	JQGB01000012	2.32
	1558	JP74_08120	JQGB01000012	2.32
	1559	JP74_08365	JQGB01000013	2.32
	1560	JP74_10885	JQGB01000018	2.32
	1561	JP74_12800	JQGB01000021	2.32
	1562	JP74_15600	JQGB01000027	2.32
	1563	JP74_07845	JQGB01000012	2.32
	1564	JP74_10275	JQGB01000017	2.32
	1565	JP74_14200	JQGB01000023	2.32
	1566	JP74_16095	JQGB01000027	2.32
	1567	JP74_16645	JQGB01000028	2.32
	1568	JP74_20175	JQGB01000041	2.32
	1569	JP74_21330	JQGB01000048	2.32
	1570	JP74_20900	JQGB01000047	2.32
	1571	JP74_12000	JQGB01000020	2.32
	1572	JP74_18280	JQGB01000034	2.31
	1573	JP74_03770	JQGB01000004	2.31
	1574	JP74_06115	JQGB01000010	2.31
	1575	JP74_19345	JQGB01000036	2.31
	1576	JP74_17745	JQGB01000034	2.31
	1577	JP74_02715	JQGB01000003	2.31
	1578	JP74_05140	JQGB01000009	2.31
	1579	JP74_18185	JQGB01000034	2.31
	1580	JP74_02485	JQGB01000002	2.31
	1581	JP74_11865	JQGB01000020	2.31
	1582	JP74_17950	JQGB01000034	2.31
	1583	JP74_12635	JQGB01000021	2.31
	1584	JP74_08250	JQGB01000012	2.31
	1585	JP74_13815	JQGB01000022	2.31
	1586	JP74_09345	JQGB01000015	2.31
	1587	JP74_04570	JQGB01000006	2.31
	1588	JP74_08370	JQGB01000013	2.31
	1589	JP74_22935	JQGB01000071	2.31
	1590	JP74_06610	JQGB01000011	2.3
	1591	JP74_06335	JQGB01000010	2.3
	1592	JP74_02300	JQGB01000002	2.3
	1593	JP74_00170	JQGB01000001	2.3
	1594	JP74_08245	JQGB01000012	2.3
	1595	JP74_08445	JQGB01000013	2.3
	1596	JP74_22255	JQGB01000054	2.3
	1597	fabG	JQGB01000015	2.3
	1598	JP74_01325	JQGB01000002	2.3
	1599	JP74_05825	JQGB01000009	2.3
	1600	JP74_00325	JQGB01000001	2.3
	1601	JP74_14130	JQGB01000023	2.3
	1602	JP74_14240	JQGB01000023	2.3
	1603	JP74_19775	JQGB01000038	2.3
	1604	clpA	JQGB01000002	2.3
	1605	JP74_01905	JQGB01000002	2.3
	1606	JP74_03205	JQGB01000004	2.3
	1607	JP74_07165	JQGB01000012	2.3
	1608	JP74_00215	JQGB01000001	2.3
	1609	JP74_06185	JQGB01000010	2.3
	1610	JP74_00040	JQGB01000001	2.3
	1611	JP74_15830	JQGB01000027	2.3
	1612	JP74_06905	JQGB01000011	2.3
	1613	JP74_20965	JQGB01000047	2.3
	1614	JP74_03300	JQGB01000004	2.29
	1615	JP74_06955	JQGB01000012	2.29
	1616	JP74_07990	JQGB01000012	2.29
	1617	JP74_15015	JQGB01000025	2.29
	1618	JP74_22670	JQGB01000062	2.29
	1619	JP74_07590	JQGB01000012	2.29
	1620	JP74_08080	JQGB01000012	2.29
	1621	JP74_20195	JQGB01000041	2.29
	1622	JP74_20125	JQGB01000041	2.29
	1623	JP74_06180	JQGB01000010	2.29
	1624	JP74_15825	JQGB01000027	2.29
	1625	JP74_16735	JQGB01000029	2.29
	1626	JP74_19405	JQGB01000036	2.29
	1627	JP74_12760	JQGB01000021	2.29
	1628	JP74_09265	JQGB01000015	2.29
	1629	JP74_01790	JQGB01000002	2.29
	1630	JP74_00375	JQGB01000001	2.29
	1631	JP74_14755	JQGB01000025	2.28
	1632	JP74_03290	JQGB01000004	2.28
	1633	JP74_12845	JQGB01000021	2.28
	1634	JP74_20935	JQGB01000047	2.28
	1635	JP74_10785	JQGB01000018	2.28
	1636	JP74_03405	JQGB01000004	2.28
	1637	JP74_00900	JQGB01000002	2.28
	1638	JP74_15390	JQGB01000026	2.28
	1639	JP74_01515	JQGB01000002	2.28
	1640	JP74_18465	JQGB01000035	2.28
	1641	JP74_00390	JQGB01000001	2.28
	1642	JP74_02010	JQGB01000002	2.28
	1643	JP74_03270	JQGB01000004	2.28
	1644	JP74_22890	JQGB01000068	2.28
	1645	JP74_00585	JQGB01000001	2.28
	1646	JP74_00105	JQGB01000001	2.28
	1647	JP74_02755	JQGB01000003	2.28
	1648	JP74_03545	JQGB01000004	2.28
	1649	JP74_21790	JQGB01000050	2.28
	1650	JP74_14370	JQGB01000024	2.28
	1651	JP74_15495	JQGB01000026	2.28
	1652	JP74_06720	JQGB01000011	2.28
	1653	JP74_18290	JQGB01000034	2.28
	1654	JP74_08290	JQGB01000013	2.28
	1655	JP74_07125	JQGB01000012	2.28
	1656	JP74_10210	JQGB01000016	2.28
	1657	JP74_15270	JQGB01000026	2.28
	1658	JP74_21665	JQGB01000049	2.28
	1659	JP74_00305	JQGB01000001	2.28
	1660	JP74_01015	JQGB01000002	2.28
	1661	JP74_08135	JQGB01000012	2.27
	1662	JP74_15525	JQGB01000026	2.27
	1663	JP74_21965	JQGB01000052	2.27
	1664	JP74_08870	JQGB01000014	2.27
	1665	JP74_09210	JQGB01000015	2.27
	1666	JP74_00220	JQGB01000001	2.27
	1667	JP74_04565	JQGB01000006	2.27
	1668	JP74_07425	JQGB01000012	2.27
	1669	JP74_10835	JQGB01000018	2.27
	1670	JP74_12245	JQGB01000021	2.27
	1671	JP74_16930	JQGB01000029	2.27
	1672	JP74_04370	JQGB01000006	2.27
	1673	JP74_01355	JQGB01000002	2.27
	1674	JP74_07305	JQGB01000012	2.27
	1675	JP74_20160	JQGB01000041	2.27
	1676	JP74_09010	JQGB01000015	2.27
	1677	JP74_23220	JQGB01000088	2.27
	1678	JP74_08530	JQGB01000014	2.27
	1679	JP74_15230	JQGB01000026	2.27
	1680	JP74_06780	JQGB01000011	2.27
	1681	JP74_10475	JQGB01000018	2.27
	1682	JP74_09380	JQGB01000015	2.27
	1683	JP74_19045	JQGB01000036	2.27
	1684	JP74_23070	JQGB01000079	2.27
	1685	JP74_12695	JQGB01000021	2.27
	1686	JP74_16955	JQGB01000029	2.27
	1687	JP74_18795	JQGB01000035	2.27
	1688	JP74_22565	JQGB01000059	2.27
	1689	JP74_05970	JQGB01000009	2.26
	1690	JP74_14560	JQGB01000024	2.26
	1691	JP74_19195	JQGB01000036	2.26
	1692	JP74_05745	JQGB01000009	2.26
	1693	JP74_18235	JQGB01000034	2.26
	1694	JP74_07440	JQGB01000012	2.26
	1695	JP74_08535	JQGB01000014	2.26
	1696	JP74_06470	JQGB01000010	2.26
	1697	JP74_07415	JQGB01000012	2.26
	1698	JP74_10615	JQGB01000018	2.26
	1699	JP74_17300	JQGB01000031	2.26
	1700	JP74_10270	JQGB01000017	2.26
	1701	JP74_11600	JQGB01000020	2.26
	1702	JP74_06550	JQGB01000010	2.26
	1703	JP74_00915	JQGB01000002	2.26
	1704	JP74_01040	JQGB01000002	2.26
	1705	JP74_04685	JQGB01000007	2.26
	1706	JP74_08505	JQGB01000014	2.26
	1707	JP74_21190	JQGB01000047	2.26
	1708	pleD	JQGB01000002	2.26
	1709	JP74_18830	JQGB01000035	2.26
	1710	JP74_20410	JQGB01000043	2.26
	1711	flgI	JQGB01000002	2.26
	1712	purE	JQGB01000019	2.26
	1713	JP74_22325	JQGB01000054	2.26
	1714	JP74_02135	JQGB01000002	2.26
	1715	JP74_15140	JQGB01000026	2.26
	1716	JP74_15870	JQGB01000027	2.26
	1717	JP74_22460	JQGB01000056	2.26
	1718	JP74_07560	JQGB01000012	2.26
	1719	JP74_03805	JQGB01000004	2.26
	1720	JP74_04280	JQGB01000006	2.26
	1721	JP74_15155	JQGB01000026	2.26
	1722	JP74_20590	JQGB01000045	2.26
	1723	JP74_08480	JQGB01000013	2.26
	1724	JP74_10890	JQGB01000018	2.26
	1725	JP74_11735	JQGB01000020	2.25
	1726	JP74_12020	JQGB01000020	2.25
	1727	JP74_19100	JQGB01000036	2.25
	1728	lldD	JQGB01000038	2.25
	1729	JP74_03455	JQGB01000004	2.25
	1730	JP74_03800	JQGB01000004	2.25
	1731	JP74_01950	JQGB01000002	2.25
	1732	JP74_21425	JQGB01000049	2.25
	1733	JP74_10255	JQGB01000017	2.25
	1734	JP74_04630	JQGB01000006	2.25
	1735	JP74_08915	JQGB01000014	2.25
	1736	JP74_08920	JQGB01000014	2.25
	1737	JP74_13000	JQGB01000021	2.25
	1738	JP74_02590	JQGB01000002	2.25
	1739	JP74_17700	JQGB01000034	2.25
	1740	JP74_01430	JQGB01000002	2.24
	1741	JP74_03325	JQGB01000004	2.24
	1742	JP74_10315	JQGB01000017	2.24
	1743	JP74_21485	JQGB01000049	2.24
	1744	JP74_15025	JQGB01000025	2.24
	1745	JP74_10325	JQGB01000017	2.24
	1746	JP74_11770	JQGB01000020	2.24
	1747	JP74_15305	JQGB01000026	2.24
	1748	JP74_21310	JQGB01000048	2.24
	1749	JP74_20430	JQGB01000043	2.24
	1750	JP74_09755	JQGB01000015	2.24
	1751	JP74_19875	JQGB01000040	2.24
	1752	JP74_18660	JQGB01000035	2.24
	1753	JP74_00580	JQGB01000001	2.24
	1754	JP74_07870	JQGB01000012	2.24
	1755	JP74_03335	JQGB01000004	2.24
	1756	fumC	JQGB01000036	2.24
	1757	JP74_08360	JQGB01000013	2.24
	1758	JP74_21515	JQGB01000049	2.24
	1759	JP74_17215	JQGB01000031	2.24
	1760	JP74_03885	JQGB01000005	2.24
	1761	JP74_13835	JQGB01000022	2.24
	1762	JP74_16365	JQGB01000027	2.24
	1763	JP74_13730	JQGB01000022	2.24
	1764	JP74_05990	JQGB01000009	2.24
	1765	JP74_18410	JQGB01000035	2.24
	1766	JP74_05505	JQGB01000009	2.23
	1767	JP74_17385	JQGB01000033	2.23
	1768	JP74_12790	JQGB01000021	2.23
	1769	JP74_09025	JQGB01000015	2.23
	1770	JP74_00575	JQGB01000001	2.23
	1771	JP74_06450	JQGB01000010	2.23
	1772	JP74_07350	JQGB01000012	2.23
	1773	JP74_08845	JQGB01000014	2.23
	1774	JP74_04065	JQGB01000005	2.23
	1775	JP74_08485	JQGB01000013	2.23
	1776	JP74_15740	JQGB01000027	2.23
	1777	JP74_15985	JQGB01000027	2.23
	1778	JP74_17275	JQGB01000031	2.23
	1779	JP74_18170	JQGB01000034	2.23
	1780	JP74_22000	JQGB01000052	2.23
	1781	JP74_23350	JQGB01000098	2.23
	1782	JP74_12775	JQGB01000021	2.23
	1783	JP74_16120	JQGB01000027	2.23
	1784	JP74_15275	JQGB01000026	2.23
	1785	JP74_17970	JQGB01000034	2.23
	1786	JP74_12195	JQGB01000021	2.23
	1787	JP74_10440	JQGB01000017	2.23
	1788	JP74_23095	JQGB01000079	2.23
	1789	JP74_07765	JQGB01000012	2.23
	1790	JP74_00610	JQGB01000001	2.23
	1791	JP74_12935	JQGB01000021	2.23
	1792	glyA (JQGB01000021 105788..107069)	JQGB01000021	2.22
	1793	JP74_00350	JQGB01000001	2.22
	1794	JP74_13075	JQGB01000021	2.22
	1795	JP74_11580	JQGB01000020	2.22
	1796	JP74_01305	JQGB01000002	2.22
	1797	JP74_08800	JQGB01000014	2.22
	1798	JP74_17870	JQGB01000034	2.22
	1799	JP74_15425	JQGB01000026	2.22
	1800	oppB	JQGB01000026	2.22
	1801	JP74_02630	JQGB01000003	2.22
	1802	JP74_06640	JQGB01000011	2.22
	1803	JP74_21580	JQGB01000049	2.22
	1804	JP74_14930	JQGB01000025	2.22
	1805	JP74_15280	JQGB01000026	2.22
	1806	JP74_19840	JQGB01000040	2.22
	1807	JP74_21870	JQGB01000050	2.22
	1808	JP74_23000	JQGB01000073	2.22
	1809	JP74_16670	JQGB01000029	2.22
	1810	JP74_08645	JQGB01000014	2.22
	1811	JP74_10185	JQGB01000016	2.22
	1812	JP74_09390	JQGB01000015	2.22
	1813	JP74_16535	JQGB01000027	2.22
	1814	JP74_20340	JQGB01000043	2.22
	1815	JP74_00315	JQGB01000001	2.22
	1816	JP74_02380	JQGB01000002	2.22
	1817	JP74_08170	JQGB01000012	2.22
	1818	JP74_01260	JQGB01000002	2.21
	1819	JP74_20220	JQGB01000041	2.21
	1820	JP74_03265	JQGB01000004	2.21
	1821	JP74_11030	JQGB01000019	2.21
	1822	JP74_11790	JQGB01000020	2.21
	1823	JP74_17805	JQGB01000034	2.21
	1824	JP74_13120	JQGB01000022	2.21
	1825	JP74_10425	JQGB01000017	2.21
	1826	JP74_11000	JQGB01000018	2.21
	1827	JP74_18990	JQGB01000036	2.21
	1828	JP74_09885	JQGB01000015	2.21
	1829	JP74_02200	JQGB01000002	2.21
	1830	JP74_09550	JQGB01000015	2.21
	1831	JP74_17810	JQGB01000034	2.21
	1832	JP74_02295	JQGB01000002	2.21
	1833	JP74_12730	JQGB01000021	2.21
	1834	JP74_13255	JQGB01000022	2.21
	1835	JP74_15110	JQGB01000026	2.21
	1836	JP74_15460	JQGB01000026	2.21
	1837	JP74_16995	JQGB01000029	2.21
	1838	JP74_04545	JQGB01000006	2.21
	1839	JP74_07090	JQGB01000012	2.21
	1840	JP74_18205	JQGB01000034	2.21
	1841	JP74_20950	JQGB01000047	2.2
	1842	JP74_05320	JQGB01000009	2.2
	1843	JP74_00425	JQGB01000001	2.2
	1844	JP74_06350	JQGB01000010	2.2
	1845	JP74_05930	JQGB01000009	2.2
	1846	mraY	JQGB01000012	2.2
	1847	JP74_22925	JQGB01000070	2.2
	1848	JP74_09170	JQGB01000015	2.2
	1849	JP74_03865	JQGB01000005	2.2
	1850	JP74_17220	JQGB01000031	2.2
	1851	JP74_06175	JQGB01000010	2.2
	1852	JP74_01115	JQGB01000002	2.2
	1853	JP74_22830	JQGB01000067	2.2
	1854	JP74_06860	JQGB01000011	2.2
	1855	JP74_01080	JQGB01000002	2.2
	1856	JP74_08940	JQGB01000014	2.2
	1857	JP74_16580	JQGB01000028	2.2
	1858	JP74_08675	JQGB01000014	2.2
	1859	JP74_18535	JQGB01000035	2.2
	1860	JP74_08500	JQGB01000014	2.2
	1861	JP74_06120	JQGB01000010	2.2
	1862	JP74_22465	JQGB01000056	2.2
	1863	JP74_10120	JQGB01000016	2.2
	1864	JP74_13845	JQGB01000022	2.2
	1865	JP74_15785	JQGB01000027	2.2
	1866	JP74_20190	JQGB01000041	2.2
	1867	JP74_17505	JQGB01000033	2.2
	1868	JP74_18525	JQGB01000035	2.2
	1869	JP74_11710	JQGB01000020	2.2
	1870	pyrB	JQGB01000002	2.2
	1871	JP74_03275	JQGB01000004	2.19
	1872	JP74_14795	JQGB01000025	2.19
	1873	JP74_00120	JQGB01000001	2.19
	1874	JP74_10010	JQGB01000016	2.19
	1875	JP74_14140	JQGB01000023	2.19
	1876	JP74_07160	JQGB01000012	2.19
	1877	JP74_09565	JQGB01000015	2.19
	1878	JP74_07705	JQGB01000012	2.19
	1879	JP74_01030	JQGB01000002	2.19
	1880	JP74_09035	JQGB01000015	2.19
	1881	JP74_14960	JQGB01000025	2.19
	1882	JP74_18240	JQGB01000034	2.19
	1883	JP74_04595	JQGB01000006	2.19
	1884	JP74_15760	JQGB01000027	2.19
	1885	JP74_03940	JQGB01000005	2.19
	1886	JP74_19335	JQGB01000036	2.18
	1887	JP74_01405	JQGB01000002	2.18
	1888	JP74_18120	JQGB01000034	2.18
	1889	JP74_04170	JQGB01000006	2.18
	1890	JP74_11250	JQGB01000020	2.18
	1891	JP74_16855	JQGB01000029	2.18
	1892	JP74_00490	JQGB01000001	2.18
	1893	JP74_11385	JQGB01000020	2.18
	1894	JP74_03785	JQGB01000004	2.18
	1895	JP74_04845	JQGB01000008	2.18
	1896	JP74_14820	JQGB01000025	2.18
	1897	JP74_09650	JQGB01000015	2.18
	1898	JP74_18175	JQGB01000034	2.18
	1899	JP74_05180	JQGB01000009	2.18
	1900	JP74_14515	JQGB01000024	2.18
	1901	JP74_19510	JQGB01000037	2.18
	1902	JP74_19750	JQGB01000038	2.18
	1903	JP74_20370	JQGB01000043	2.18
	1904	JP74_00755	JQGB01000002	2.18
	1905	JP74_00205	JQGB01000001	2.18
	1906	JP74_06960	JQGB01000012	2.18
	1907	JP74_08990	JQGB01000015	2.18
	1908	JP74_00805	JQGB01000002	2.18
	1909	JP74_04220	JQGB01000006	2.18
	1910	JP74_02610	JQGB01000002	2.18
	1911	JP74_05510	JQGB01000009	2.18
	1912	JP74_07085	JQGB01000012	2.18
	1913	JP74_19265	JQGB01000036	2.18
	1914	JP74_20325	JQGB01000043	2.18
	1915	JP74_13375	JQGB01000022	2.17
	1916	JP74_04365	JQGB01000006	2.17
	1917	JP74_02480	JQGB01000002	2.17
	1918	JP74_03520	JQGB01000004	2.17
	1919	JP74_19250	JQGB01000036	2.17
	1920	JP74_01965	JQGB01000002	2.17
	1921	JP74_23290	JQGB01000093	2.17
	1922	JP74_06265	JQGB01000010	2.17
	1923	JP74_11210	JQGB01000019	2.17
	1924	JP74_21495	JQGB01000049	2.17
	1925	JP74_14790	JQGB01000025	2.17
	1926	JP74_22845	JQGB01000067	2.17
	1927	JP74_05070	JQGB01000009	2.17
	1928	JP74_20630	JQGB01000045	2.17
	1929	JP74_22085	JQGB01000052	2.17
	1930	JP74_01010	JQGB01000002	2.17
	1931	JP74_03600	JQGB01000004	2.17
	1932	JP74_16815	JQGB01000029	2.17
	1933	JP74_06595	JQGB01000010	2.17
	1934	JP74_10575	JQGB01000018	2.17
	1935	JP74_13265	JQGB01000022	2.17
	1936	JP74_15055	JQGB01000025	2.17
	1937	JP74_20895	JQGB01000047	2.17
	1938	JP74_03000	JQGB01000004	2.16
	1939	JP74_00820	JQGB01000002	2.16
	1940	JP74_08350	JQGB01000013	2.16
	1941	JP74_14365	JQGB01000024	2.16
	1942	JP74_16805	JQGB01000029	2.16
	1943	JP74_19930	JQGB01000040	2.16
	1944	JP74_05065	JQGB01000009	2.16
	1945	JP74_17890	JQGB01000034	2.16
	1946	JP74_06230	JQGB01000010	2.16
	1947	JP74_18880	JQGB01000035	2.16
	1948	JP74_19800	JQGB01000038	2.16
	1949	JP74_20650	JQGB01000045	2.16
	1950	JP74_02425	JQGB01000002	2.16
	1951	JP74_20380	JQGB01000043	2.16
	1952	JP74_03320	JQGB01000004	2.16
	1953	JP74_11370	JQGB01000020	2.16
	1954	JP74_00935	JQGB01000002	2.16
	1955	JP74_02080	JQGB01000002	2.16
	1956	JP74_13495	JQGB01000022	2.16
	1957	JP74_17500	JQGB01000033	2.16
	1958	JP74_15765	JQGB01000027	2.16
	1959	JP74_00785	JQGB01000002	2.16
	1960	JP74_12745	JQGB01000021	2.16
	1961	JP74_10360	JQGB01000017	2.16
	1962	JP74_05695	JQGB01000009	2.16
	1963	JP74_18110	JQGB01000034	2.15
	1964	JP74_21860	JQGB01000050	2.15
	1965	JP74_17645	JQGB01000034	2.15
	1966	JP74_19850	JQGB01000040	2.15
	1967	JP74_22760	JQGB01000063	2.15
	1968	JP74_03105	JQGB01000004	2.15
	1969	JP74_05485	JQGB01000009	2.15
	1970	JP74_10025	JQGB01000016	2.15
	1971	cysW	JQGB01000029	2.15
	1972	JP74_10770	JQGB01000018	2.15
	1973	JP74_07175	JQGB01000012	2.15
	1974	JP74_04510	JQGB01000006	2.15
	1975	JP74_13695	JQGB01000022	2.15
	1976	JP74_08215	JQGB01000012	2.15
	1977	JP74_10045	JQGB01000016	2.15
	1978	JP74_21760	JQGB01000050	2.15
	1979	JP74_14600	JQGB01000024	2.15
	1980	JP74_04895	JQGB01000008	2.14
	1981	JP74_21335	JQGB01000048	2.14
	1982	JP74_11215	JQGB01000019	2.14
	1983	JP74_22200	JQGB01000054	2.14
	1984	JP74_00360	JQGB01000001	2.14
	1985	JP74_11685	JQGB01000020	2.14
	1986	JP74_03070	JQGB01000004	2.14
	1987	JP74_10420	JQGB01000017	2.14
	1988	JP74_04270	JQGB01000006	2.14
	1989	JP74_12530	JQGB01000021	2.14
	1990	JP74_00055	JQGB01000001	2.14
	1991	JP74_14195	JQGB01000023	2.14
	1992	JP74_11680	JQGB01000020	2.14
	1993	JP74_03540	JQGB01000004	2.14
	1994	ureC	JQGB01000012	2.14
	1995	JP74_14430	JQGB01000024	2.14
	1996	JP74_08395	JQGB01000013	2.14
	1997	JP74_04210	JQGB01000006	2.14
	1998	JP74_09870	JQGB01000015	2.13
[truncated: 2,014 more rows]
